# Supplementary material
Source: PubMed Central journal article supplement (PMC2238196)
Supplement: jbacter_190_4_1401__1.pdf [file jbacter_190_4_1401__1.pdf]

**Figure S1. Multiple sequence alignments.** (A) CRISPR repeats; (B) concatenated Cas protein sequences; (C) Cas1 sequences. Lin, *Listeria innocua* Clip11262 (AL592022); Mbo, *Mycobacterium bovis* BCG Pasteur 1173P2 (AM408590); Mtu, *Mycobacterium tuberculosis* F11 (CP000717); Sag, *Streptococcus agalactiae* A909 (CP000114); Sep, *Staphylococcus epidermidis* RP62A (CP000029); Smu, *Streptococcus mutans* UA159 (AE014133); Spy, *Streptococcus pyogenes* MGAS5005 (CP000017); Ssa, *Streptococcus sanguinis* SK36 (CP000387); *Streptococcus suis* 89/1591 (AAFA00000000); Sth, *Streptococcus thermophilus* LMD-9 (CP000419). CR1, CRISPR1; CR2, CRISPR2; CR3, CRISPR3; CRa, CRb, two CRISPR loci in *S. pyogenes*.

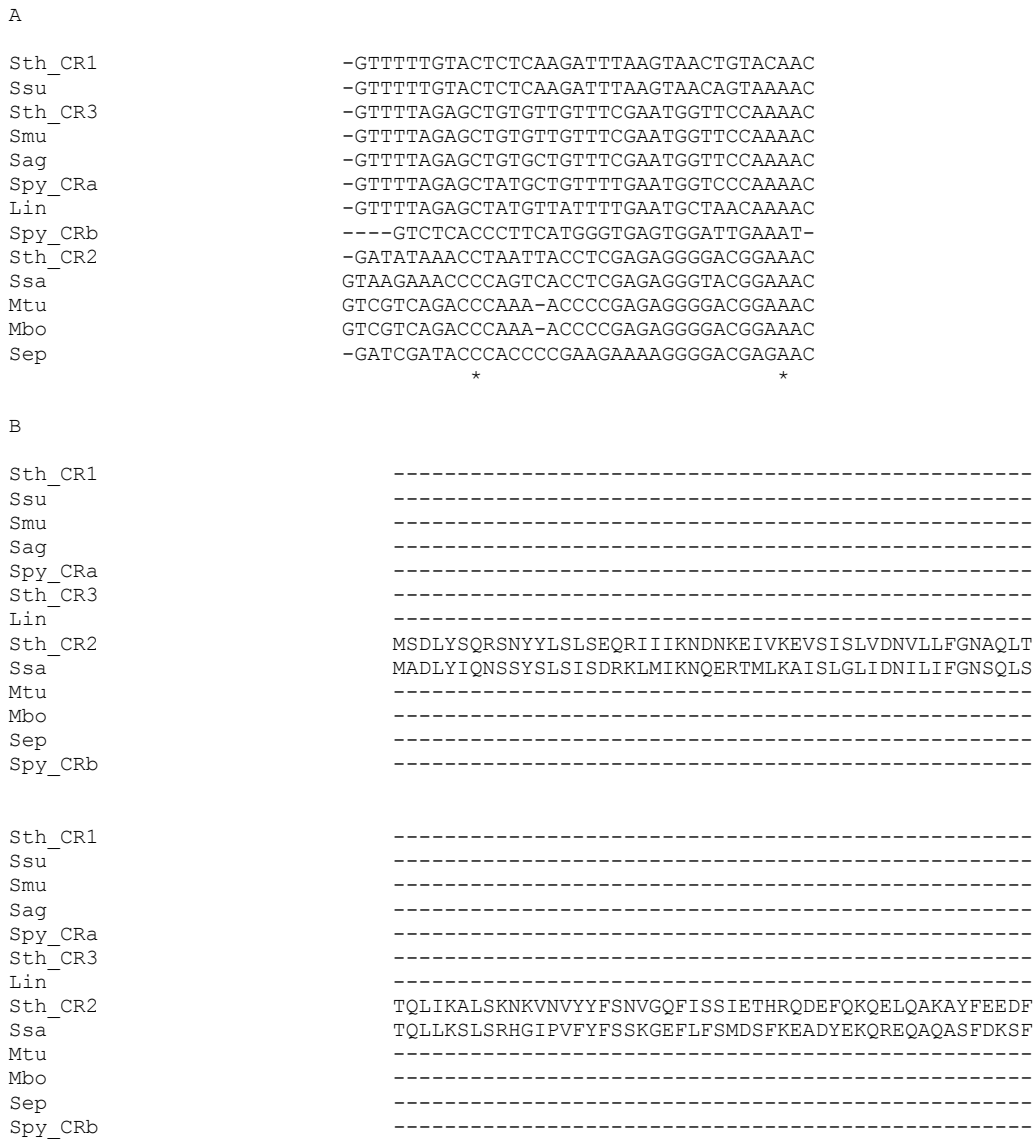

Sth\_CR1 -----  
Ssu -----  
Smu -----  
Sag -----  
Spy\_CRa -----  
Sth\_CR3 -----  
Lin -----  
Sth\_CR2 RLEVARSIATTKVRHQIALLREFDTDGLLDTSDYSRFEDSVNDIQKAYSI  
Ssa CLKMSKRIASAKIMNQLNLLKAYDEQGLFDEEDFKRFSACESLESAKSI  
Mtu -----  
Mbo -----  
Sep -----  
Spy\_CRb -----MILAHYDCKKDKKQSLDEHLWHVACSS

Sth\_CR1 -----  
Ssu -----  
Smu -----  
Sag -----  
Spy\_CRa -----  
Sth\_CR3 -----  
Lin -----  
Sth\_CR2 TEIMGYEGRLAKSYFYLNLLVPDDFHFNGRSRRTAEDCFNSALNFGYSI  
Ssa SEIMGIEGRIAKSYFYLNLLVEEDFQFYSRNRSPSLDRFNALLNFGYSI  
Mtu -----  
Mbo -----  
Sep ----MKDVIYVENHYFVTAKENSIKFRNVIDKSEKFYLFEEIEAIIFDH  
Spy\_CRb RQEASIIIGQGDVLFLLIGLYHDLGKADRTFQDKLLNPNRHVDHSYAGAKY

Sth\_CR1 -----  
Ssu -----  
Smu -----  
Sag -----  
Spy\_CRa -----  
Sth\_CR3 -----  
Lin -----  
Sth\_CR2 LYSCLMGLIKKNGLSLGFGVIHKKHQHATLASDLMEWRPIIVDNTLME  
Ssa LYSCFIGLIRKNGLSAGFGVTHQPHTHHAVLASDLMEWRPVIIVDDTVMS  
Mtu -----  
Mbo -----  
Sep YKSYFSHKLVIKCIENDIAIIFCDKKHSP-----  
Spy\_CRb LCSIIIGPHLKNRGVDKNERMTFN-----

Sth\_CR1 -----  
Ssu -----  
Smu -----  
Sag -----  
Spy\_CRa -----  
Sth\_CR3 -----  
Lin -----  
Sth\_CR2 LIRNG-----KLLLS--HFENKDQDFILTDEGREIFAWALRSRILEVH  
Ssa LIKHGDIRGGAFMVLGGEHFEKMGDEMHLTSEGIEVFSRAMRERILEIH  
Mtu -----  
Mbo -----  
Sep -----VTQLISSYGMVNRKRIQSQ  
Spy\_CRb -----EMVGYVISAHHGMYDLCYFDDAE

Sth\_CR1 -----  
Ssu -----  
Smu -----  
Sag -----  
Spy\_CRa -----  
Sth\_CR3 -----  
Lin -----  
Sth\_CR2 RYIELDKKRYSFLYTADRQIKSLIRAFRELDPSLYETSYTGGHMGLYFNL  
Ssa HYVELDKNRYTFLYMADQQVKS LIRCFKSRNADDYISSYTGEVKMTFYNL  
Mtu -----  
Mbo -----

Sep FQLSGRTKDRIVKWKIVNKKIFNQTRCLENNLHNENVKMLG-----FAKE  
Spy\_CRb YYGFNKFKNRINRDLDDGYHYHEDIKGYALKLEKLCYGYKDLRELIDKA

Sth\_CR1 -----MSD-LVLGLDIGIGSVGVGI  
Ssu -----MSNGKILGLDIGIASVGVGV  
Smu -----MKKPYSIGLDIGTNSVGWAV  
Sag -----MNKPYSIGLDIGTNSVGSWI  
Spy\_CRa -----MDKKYSIGLDIGTNSVGWAV  
Sth\_CR3 -----MTKPYSIGLDIGTNSVGWAV  
Lin -----MKKPYTIGLDIGTNSVGWAV  
Sth\_CR2 SEEEREFKQKTMFCLIIYDIRSNKRRLKLSKLLLEGYGVVRQKSCFEVNL  
Ssa DSVSKEFARKKTKFCLVIYDIVSNKRRLKLALELEGYGTRVQRSCFEVDI  
Mtu -----LAARRGGIRRTDLLRRSQPRGRHRASAAE  
Mbo -----LAARRGGIRRTDLLRRSQPRGRHRASAAE  
Sep VSSGDKSNKEAHATRIYFKDLFGKQFKRGRYNDVINSGLNYGYSILRSFI  
Spy\_CRb FDNYQQAMSSLNWQDKSEWYYQSCMVRLYLSLLKNADILDTVNAYGLKI

Sth\_CR1 LN-----KVTGE-----  
Ssu ID-----AQTGE-----  
Smu VTDDYKVPAKMKVVLGNTDKSH-----  
Sag ITDDYKVPAKMVRVLGNTDKEY-----  
Spy\_CRa ITDDYKVPSSKFKVVLGNTDRHS-----  
Sth\_CR3 TTDNYKVPSSKMKVVLGNTSKKY-----  
Lin LTDQYDLVKKMKIAGDSEKKQ-----  
Sth\_CR2 SRNDYQSLKLDIEGFYKADEEDSIIVYVTTKEEVTFSFPHYSAEKLDDIL  
Ssa EKLNFELLIKDIRDFYQADEGDNIIVYVGHK-----  
Mtu SGLTWISPTLILVGFSHRGDRRMTEHLSRLT-----  
Mbo SGLTWISPTLILVGFSHRGDRRMTEHLSRLT-----  
Sep NKELAIHGFEMSLGIKHQSKEN-----  
Spy\_CRb SPMDKTERSFLKHSYLAIEQKYASFGQP-----

Sth\_CR1 --I IHKNSRI FPAQAENNLVRRTNRQGRRLARRKKHRRVRLNRLFEESE  
Ssu --I HASRI FPSANAANNAERTRFRGSRRLIRRKKHRIKRLDDLFN--D  
Smu --IEKNLLGALLFDSGNTAEDRRLKRTARRRYTRRRNRILYLQEIFSEEM  
Sag --IKKNLIGALLFDGGNTAADRRLKRTARRRYTRRRNRILYLQEIFAEEM  
Spy\_CRa --IKKNLIGALLFDSGETAEATRLKRTARRRYTRRKNRICYLQEIFSNEM  
Sth\_CR3 --IKKNLLGVLLFDSGITAEGRLKRTARRRYTRRRNRILYLQEIFSTEM  
Lin --IKKNFWGVRLFDEGQTAADRRMARTARRRIERRNRISYLGQIFAEEM  
Sth\_CR2 FFMKKLVFTFKRIDHPAQDLAVKFHGFLEQLDSYVDYLHQQTNPYAT  
Ssa --VKKIRLHLSKVSLKDDDLVCKLQGFLEKLSDDFASFLHQQTNPYSM  
Mtu --LTLEVDAPLERARVATLGPHLHGVLMESIPADYVQTLHTVFPVNPYSQ  
Mbo --LTLEVDAPLERARVATLGPHLHGVLMESIPADYVQTLHTVFPVNPYSQ  
Sep ----PFNLADDIEVFRPFVDNIVYEIVFKKNI DTFDINEKKLLLNVLVE  
Spy\_CRb --NNQLNTRTEIAERVKERGRDSDKGIYRLDLPTGAGKTNLSMRYAFHQ

Sth\_CR1 LITDFTKISINLNYPQLRVKGLTDELSNEELFIALKNMVKGHRGISYLD  
Ssu FHINLDGEMSTDNYPVLRVKGSLQKLTVEELYISIKNIMKRRGISYLD  
Smu GKVDDSFHRLLEDVFLVTEDKRGERHPIFGNLEEEVKYHENFPTIYHLRQ  
Sag SKVDDSFHRLLEDVFLVEEDKRGSKYPIFATLQEEKDYHEKFSSTIYHLRK  
Spy\_CRa AKVDDSFHRLLEDVFLVEEDKHERHPIFGNIVDEVAYHEKYPTIYHLRK  
Sth\_CR3 ATLDDAFFQRLDDVFLVDDKRDVSKYPIFGNIVVEEKAYHDEFPTIYHLRK  
Lin SKTDANFFCRLSDSFYVNEKRNRSRHPFATIEEEVEYHKNYPTIYHLRE  
Sth\_CR2 KVIQ-GKENTQWVHLLTDDIEDKVFMFL--LQIKEVSLN-DLPKLSVEK  
Ssa NLRS-ERESIWTVNLLSEEAEQQILPQL--LSLEMIKLETYSEEILVKN  
Mtu YALARSTTSLEWKISTLTNEARQQIVGPIINDAAFAGFRLRASGIATQVTS  
Mbo YALARSTTSLEWKISTLTNEARQQIVGPIINDAAFAGFRLRASGIATQVTS  
Sep RCIIDKKVVRLLDSVKIYIQLIRCYEENTPTYLLLPKMIENSDVVKLF  
Spy\_CRb LVHHDKSRFFYITPFLSVLEQNASEIRKVTGDLGVLEHHSNVVKQANEDD

Sth\_CR1 SDDGNSSVGDYAIQVKNESK----QLETKTPGQIQLERYQT-----Y  
Ssu ESDNEAGRSDYAKAIERNRQ----LLTSKTPGEIQLEK-----Y  
Smu YLADNPEKVDLRLVYLALAH----IKFRGHFLIEG-KFDTRNNDVQRLF  
Sag ELADKKEKADLRLIYIALAH----IKFRGHFLIEDDSFDVRNTDISKQY  
Spy\_CRa KLVDDSTDKADLRLIYIALAH----MIKFRGHFLIEG-DLNPDSNDVVKLF  
Sth\_CR3 YLADSTKKADLRLVYLALAH----MIKYRGHFLIEG-EFNSKNNDIQKNF  
Lin ELVNSSEKADLRLVYLALAH----IKYRGNFLIEG-ALDTQNTSVDGII

Sth\_CR2 VEIQELGTDKLLLEIFNSEENQTYFSIIIFETPTGFKSQGSYVIFPSMRLIF  
Ssa IEIQSLSSQSLLLEVFQGDASHLISLNFYPTPTFKRQQFVLFPPDTRLIF  
Mtu RSLEQNPLSQFARIFYARPETRKFRVEFLTPTAFKQSGEYVFWPDPRLV  
Mbo RSLEQNPLSQFARIFYARPETRKFRVEFLTPTAFKQSGEYVFWPDPRLV  
Sep FDLPRDTKLERRIASKYRLR-----LIELGFSMKQFSLYERVSVNQKK  
Spy\_CRb DDKDSLLSAYLSDSWDSQVVLTT--SMVQFFQTLFKTKSANLRRFSSLINS

::

Sth\_CR1 GQLRGDFTVE-KDGKK-----HRLINVFPTSAYRSEALRILQTOQ  
Ssu GQLRGNFTIIDEEQS-----QQIINVFSTSDYVKEVEKILDCQK  
Smu QEFLAVYDNTFENSS-----LQEQNVQVEEILTDKISKSAKKDRVLK  
Sag QDFLEIFNFTFENND-----LLSQNVQVEEILTDKISKSAKKDRILA  
Spy\_CRa IQLVQTYNQLFEEENP-----INASGVDAKAILSARLSKSRRLLENLIA  
Sth\_CR3 QDFLDITYNAIFESDL-----SLENSKQLEEVKDKISKLEKKDRILK  
Lin KQFIQTYNQVFASGIEDGS--LKKLEDNKDVAKILVEKVTRKEKLERILK  
Sth\_CR2 QSLMQKYGRLEVENQPEIEEDTLDYLSHSTITNYRLETSYFRVHRQRI  
Ssa QSLMQKYSRLVEGKAEIEEETLEFLAEHSQISSYRLKSHYFPIHGRKYP  
Mtu QSLAQKYGAIVDGE-EPDPGLIAEFGQSVRLSAFRVASAPFAVGAARVPG  
Mbo QSLAQKYGAIVDGE-EPDPGLIAEFGQSVRLSAFRVASAPFAVGAARVPG  
Sep DKILEILKQEIPTDGSITLYILPDEVNSNQITILGKEVKLAVNKEPKLIF  
Spy\_CRb VVILDEVQSLPIEVTTLFNLTMNFLNKVMDTTIVLCTATQPAYDSSEIDH

:

Sth\_CR1 EFNQITDEFINRYLEILTGKRKYHGPNEKSRDY-----  
Ssu MYHKFISDEFCDKLIELREKRKYVGPNEKSRDY-----  
Smu LFPNEKSNGRFAEFLKLI VGNQADFKKHFELEEKAPL-----  
Sag QYPNQKSTGIFAELFLKLI VGNQADFKKYFNLEDKTPLE-----  
Spy\_CRa QLPGEKKNLFGNLIASLGLTPNFKSNFDLAEDAKL-----  
Sth\_CR3 LFPGEKNSGIFSEFLKLI VGNQADFRKCFNLDEKASL-----  
Lin LYPGKESAGMFAQFISLIVGSKGNFQKPFDLIEKSDI-----  
Sth\_CR2 FRGKLTFKVQGAKTLLKAYVKMLLTFGEYSGLGMKTSGLMGGIKLE----  
Ssa FEGRVTIRIQGASTLKAYAQMMLRFGYSGVGAKCSLGMGGMRIE----  
Mtu FTGSATFTVRGVDTFASYIAALLWFGEFSGCGIKASMGMAIRVQPLAPR  
Mbo FTGSATFTVRGVDTFASYIAALLWFGEFSGCGIKASMGMAIRVQPLAPR  
Sep IMNKNILMYGSLLDHIGKIIYRSGDHTFSRGTSHSKLGHQFLS-----  
Spy\_CRb RICYGGNLGELAEIVELTIEEKQIFSRTELKRFDDSD-----

Sth\_CR1 --GRYR-TSGETLDNIFGILIGKC-----  
Ssu --GIYR-TDGTTLLENLFGILIGKC-----  
Smu --QFSKDTYEEELVLLAQIG-----  
Sag --QFAKDSYDEDLENLLGQIG-----  
Spy\_CRa --QLSKDTYDDDLNLLAQIG-----  
Sth\_CR3 --HFSKESYDEDELTLGIG-----  
Lin --ECAKDSYEEDESLLALIG-----  
Sth\_CR2 ---ERKDLKKEKIDLFYGALLHDIGKVIQ-RATGERKKHALVGADWFEI  
Ssa ---ERKTLKKEKIDLIYQALFYNLGRVVS-RSDGQ-SDDIDLKAWLKKQ  
Mtu EKCVPKMNPQLIEAIIIGCLLHDIGKPVQRAALGYPGRHSAIGRAFMKKV  
Mbo EKCVPKMNPQLIEAIIIGCLLHDIGKPVQRAALGYPGRHSAIGRAFMKKV  
Sep --QFSEFKDNEVLNDVAYHHYKELAKAN-----  
Spy\_CRb ---QKVHLTDVINLILGEENSVLAI FN-----

::

Sth\_CR1 -----  
Ssu -----  
Smu -----  
Sag -----  
Spy\_CRa -----  
Sth\_CR3 -----  
Lin -----  
Sth\_CR2 ADNQ-----VISDQIRYHMANYSNKLGN  
Ssa LP-----QLDFGGN  
Mtu WLRDSRNPQSFTDEVDEADIGVSDRRILDAYSYHHSSALRTAAENGRILAA  
Mbo WLRDSRNPQSFTDEVDEADIGVSDRRILDAYSYHHSSALRTAAENGRILAA  
Sep -----LDN  
Spy\_CRb -----

Sth\_CR1 -----TFYPDEFRAAKASYTAQEFN-LLNDLNNL--TVPTETKKLSKEQ  
Ssu -----TFYPDQYRSSRASYTAQEFN-FLNDLNNL--TVPTETKKLSQEQ  
Smu -----DNYAELFLSAKKLYDSILLSGILTVTDVG--TKAPLSASMIQRY

Sag -----DEFADLFSAAKKLYDSVLLSGILTVIDL--TKAPLSASMIQRY  
Spy\_CRa -----DQYADLFLAAKNLSDAILLSDILRVNTEI--TKAPLSASMIKRY  
Sth\_CR3 -----DQYSDVFLKAKKLYDAILLSGFLTVDNE--TEAPLSASMIKRY  
Lin -----DEYAEFLVAAKNAYSAVVLSIITVAETE--TNAKLSASMIERF  
Sth\_CR2 DHLAYITYIADNIAAGVDRRQSNESDEEDASAKIW--DTYTNQADIFNIF  
Ssa CRAEKI IALANNIASGS--LDENEVSKE-----QLFKPLADIFNFAF  
Mtu DAPAYIAYIADNIAAGTDRRKAD--SDDGHGASTW--DPDTPLYSMFNRF  
Mbo DAPAYIAYIADNIAAGTDRRKAD--SDDGHGASTW--DPDTPLYSMFNRF  
Sep DNTAYITYIADNIAAGIDRRDIIEEGDEEYEQQLFNFDKYTPLYSVFNIV  
Spy\_CRb --TKKTVHNCYTMLKDMTDRPVYQLSTNMCAQHRLD-LIAKIKTELQNNI

: :

Sth\_CR1 KNQIINYVKNEKAMG-----PAKLFKYIAKLLSCDVADIKG-Y  
Ssu KEFLVNYAKETSVLG-----AGKILQQIAKLADCKVEDIRG-Y  
Smu NEHQMDLAQLKQFIR-----QKLSDKYNEVFSVSKDGYAG-Y  
Sag DEHREDLKQLKQFVK-----ASLPEKYQEIFADSSKDNGELAG-Y  
Spy\_CRa DEHHQDLTLLKALVR-----QQLPEKYKEIFDQSKNGYAG-Y  
Sth\_CR3 NEHKEDLALLKEYIR-----NISLKYNEVFKDDTPKNGYAG-Y  
Lin DTHEEDLGELKAFIK-----LHLPKHYYEIEFSNTEKHGYAG-Y  
Sth\_CR2 GAQTDKRYFKPTVNLKSKPNFASATYEPFSKGDYAAIATRIKNEELAE-F  
Ssa KKKEESRYQKFEVLTDEIELNIAAGHEAVDISQDCYEELNLVNEKLQ-L  
Mtu GSGTANLAFAPMLDDRKPINIPSPRRIEFDKDRYAAIVNKLKAILVD-L  
Mbo GSGTANLAFAPMLDDRKPINIPSPRRIEFDKDRYAAIVNKLKAILVD-L  
Sep NSEKLLQNTNGKFKFSNESNIEYPKTENIQYSSGNYTTMLKMDMSHDLHL  
Spy\_CRb PICISTQLIEAGVDVDFHRVIRSYSGIDSIVQAAGRCNREGKRDKGQVT

Sth\_CR1 RIDKSGKAEIHTFEAYRKM-K-TLETLDIEQMDRETLDKLAYVLTNTERE  
Ssu RLDNKDKPELHTFETYRAMKGLVPLVDIGVLSREQLDILADILTLNTDFE  
Smu IDGKTNQEAIFYKYLKGLLNKIEGSGYFLDKIERE-----DFLRKQRTFD  
Sag IEGKTNQEAIFYKYLKGLLNKIEGSGYFLDKIERE-----DFLRKQRTFD  
Spy\_CRa IDGGASQEEFYKFIKPILEKMDGTEELLVKNRE-----DILLRQRTFD  
Sth\_CR3 IDGKTNQEDFYVYLKLLAEFEGADYFLEKIDRE-----DFLRKQRTFD  
Lin IDGKTKQADFYKYMKMTLENIEGADYFIAKIEKE-----NFLRQRTFD  
Sth\_CR2 EFNQAQIDSLNLFPEATLSFVPSSTNTKEIADIS----LSEHSRLTAafa  
Ssa SLEESLPSFFNLWRTLFSKVPLLPGDKELGDLS----LAEHSRLTVafa  
Mtu ERSPTYLASLLNVLEATLSFVPSSTDASEVVDVS----LFDHLKLTGALG  
Mbo ERSPTYLASLLNVLEATLSFVPSSTDASEVVDVS----LFDHLKLTGALG  
Sep SIKEGTFPSLLQWTESLWQYVPSSTNKNQLIDIS----LYDHSRITCAIA  
Spy\_CRb LVNLTNEENISRLTEIKTKKEATESILHKIGSP-----IDISTLNRDFF

Sth\_CR1 GIQEALEHEFADGFSFSQKQVDELV---QFRKANSSIFGKGWHNFSVKLMM  
Ssu GIREALKKQLPN-VFDEKQVKGLA---SFRKSKSQLFAGKWHNLSQKIML  
Smu NGSIPHQIHLQEMRAIIRRQAEFY---PFLADNQDRIEK-----LLTFRI  
Sag NGSIPHQVHLTELKAIIRRQSEYY---PFLKENQDRIEK-----ILTFRI  
Spy\_CRa NGSIPHQIHLGELHAILRRQEDFY---PFLKDNREKIEK-----ILTFRI  
Sth\_CR3 NGSIPYQIHLQEMRAILDQAKFY---PFLAKNKERIEK-----ILTFRI  
Lin NGAIIPHQLHLELEAILHQQAKY---PFLKENYDKIKS-----LVTFRI  
Sth\_CR2 LAIYDYLEDKGRHNYKEDLFTKAS---AFYEEEAFLLAS-----FDLSGI  
Ssa TAIYDYLENQG---QDSSLDDDES---KFYRESAFLLAS-----FDLSGI  
Mtu ACIWHYLQATGQSDFKSALFDKQD---TFYNEKAFLLTT-----FDVSGI  
Mbo ACIWHYLQATGQSDFKSALFDKQD---TFYNEKAFLLTT-----FDVSGI  
Sep SCIFDYLNENNIHNYKDELFSKYENTKSFYQKEAFLLS-----MDMSGI  
Spy\_CRb EYYYANNQGLMDYPLEDNLSIYDYLSLNIYQTANKKFKGKQLQAFKTAGA

: :

Sth\_CR1 EL-----IPELYETSEEQMTILTRLGKQKTSSSNKTKYIDEKLLT  
Ssu EV-----IPELYATSDEQMTILTRLGKFEKSSVAEYPPSSINVDEIT  
Smu PY-----YVGPLARGKSDFAWLSRKSADKITPWNFDEIVDKESSA  
Sag PY-----YIGPLAREKSDFAWMTRKTD-DSIRPWNFEDLVDKESSA  
Spy\_CRa PY-----YVGPLARGNSRFAMWTRKSE-ETITPWNFEEVVDKGASA  
Sth\_CR3 PY-----YVGPLARGNSDFAWSIRKRN-EKITPWNFEDVIDKESSA  
Lin PY-----FVGPLANGQSEFAWLTRKAD-GEIRPWNIEEKVDFGKSA  
Sth\_CR2 QD-----FIYNIATSGAAKQLKARSLYLDFMSEYIADSLDKLGLN  
Ssa QD-----FIYNIASKGAAKQLKARSLYLEFMSENIIVDSLLEKLALS  
Mtu QD-----FIYTIHSSGAAKMLRARSFYLEMLTEHLIDELLARVGLS  
Mbo QD-----FIYTIHSSGAAKMLRARSFYLEMLTEHLIDELLARVGLS  
Sep QD-----FIYNISSGALKSLRSRFSYLEMLLEIVDQLLERLELA  
Spy\_CRb KMNLINNDMIGILVYPYGAEKKLAYLEELGVSHFLSAKDYQTIKSLKEL

Sth\_CR1 EEIYNPVVAKSVRQAIIKIVNAAIKEYGDFDNIVIEMARETNEDEKKAIQ  
Ssu DEIYNPVVAKSIRQTIKLIINASIKKWGEFDQIVIEMPRDRNEDEEKKRIA  
Smu EAFINRMTNYDLYLPNQKVLPHKSLLYEKFTVYNELTKVKYKTE--QGKTA  
Sag EAFIHRMTNDFYLPPEEKVLPKHSLIYEKFTVYNELTKVRYKNE--QGKTY  
Spy\_CRa QSFIERMTNFDKLNLPNEKVLPHKSLLYEYFTVYNELTKVKYVTEGMRKPA  
Sth\_CR3 EAFINRMTSFDLYLPPEEKVLPKHSLLYEYFTVYNELTKVRFIAESMRDYQ  
Lin VDFIEKMTNKDTYLPKENVLPKHSLCYQKYLIVYNELTKVRYIND--QGKTS  
Sth\_CR2 RANLLYVSGGHAYFVLANTTEKTVE TLVQFEKDFNQFLLANFQTRLYVAFG  
Ssa RANVLYVGGGHAYFVLPNTEVTVAVLEQFEMEFNSFLLKHFQTGLYVAFG  
Mtu RANLNYSGGGHAYLLLNPNTESARKSVEQFEREANDWLENFATRLFIATG  
Mbo RANLNYSGGGHAYLLLNPNTESARKSVEQFEREANDWLENFATRLFIATG  
Sep RANLLYTGGGHAYLLVSNNTDKVKKKITQFNNELKKWFMSEFTTDLSLSMA  
Spy\_CRb QPFTVNVRENDPLFETTKSYLNGQILVLTSEYYDTERGVKYDSASFYFLY

Sth\_CR1 KIQKANKDEKDA-----MLKAANQYNGKAELPHSVFHGHKQL  
Ssu DGQKANAKEKADS-----ILRAAELYCAGKVLDPVYVYNGHNQL  
Smu FFDANMKQEIFDG-----VFKVYRKVTKDKLMDFLKFEKDFEFR  
Sag FFDNLIKQEIFDG-----VFKHRKVSKKLLDFLAKEYBEFR  
Spy\_CRa FLSGEQKKAIVDL-----LFKTRNKVTVKQLKEDYFKKIECFD  
Sth\_CR3 FLDKSKQKDIVRL-----YFKDKRKVTDKDIIEYLHAIYG--YD  
Lin YFSGQEKEQIFND-----LFKQKRKVK--KKDLELFLRNMSHVE  
Sth\_CR2 WGSFAAKDIMFELNSSES-----YRQVYQKASRMISEKKSQGMIIKP  
Ssa WAPFAAEQIMKYRYGSVASYL---QHYREIYQETS RMISEKKISRYDATT  
Mtu SVPLAANDLMRRPNESASQASNRALRYSGLYRELSEQLSAKKLARYSADQ  
Mbo SVPLAANDLMRRPNESASQASNRALRYSGLYRELSEQLSAKKLARYSADQ  
Sep FEKCSGDDLMNTSG-----NYRTIWRNVSSKLSDIKAKHYS AED  
Spy\_CRb RSRDFYVRVSGQRALFTNPATKGGSSERSYSVPTRQALNGIVDAIYYKPT

Sth\_CR1 ATKIR-----LWHQQGERCLYTGKTI SIHD-----  
Ssu ATKIR-----LWYQQGERCIYTGQPI SIHD-----  
Smu IVDLTGLDKENKVFNASYGTYHDLCKIL--DKD-----  
Sag IVDVIGLDKENKAFNASLGTYHDLKIL--DKD-----  
Spy\_CRa SVEISGVEDR---FNASLGTYHDLKIIKDKD-----  
Sth\_CR3 GIELKGIEKQ---FNSSLSTYHDLNIIINDKE-----  
Lin SPTIEGLEDS---FNSSYSTYHDLKVGIKQE-----  
Sth\_CR2 LCCM--LLNRGGKSSERECEI CHSVENLVSYHD----QKVCDCIRGLYQF  
Ssa LR---ELNKGKQSERECEI CHAVGDIKELRIGGEDVQNLCPICREL RGF  
Mtu LRELNSRDHDGQKGDRECSVCHTVNRTVSADD----EPKCSLCQAL TAA  
Mbo LRELNSRDHDGQKGDRECSVCHTVNRTVSADD----EPKCSLCQAL TAA  
Sep I LKLNHFHSYG---DRECKECLRSIDIDINDG-----LCSICEGINI  
Spy\_CRb FTNIVTEVKVINQIQTE LQGV RALLHDYSADLS-----

Sth\_CR1 -----LINNSNQFEVDHILPLSITFDD-----  
Ssu -----LIHNQNYEIDHILPLSLTFDD-----  
Smu -----FLDNSKNEKILEDIVLTLTLFE-----  
Sag -----FLDNPDNESI LEDIVQTLTLFE-----  
Spy\_CRa -----FLDNEENEDI LEDIVLTLTLFE-----  
Sth\_CR3 -----FLDSSNEAIEEIIHTLTIFE-----  
Lin -----ILDNPVNTEMLENIVKILTVFE-----  
Sth\_CR2 SKETIAHD-----HFIIIE--NEGLPIGPNACLK GVA----FEKL  
Ssa AAKIHTFNNDTENPEREDY YFQIVEGEEGLPIGPGAVLLAVD----GDDI  
Mtu SSQIQSESRR-----FLLISDGATKGLPLPFGATLTFCSRADADKAL  
Mbo SSQIQSESRR-----FLLISDGATKGLPLPFGATLTFCSRADADKAL  
Sep SNDLRDKS-----FFVLSETGKLMKPFNKFISVIDYEEAEMLV  
Spy\_CRb -----YVSYLSDVVYLIKHFVWNE DRKDLNSDR LPA

Sth\_CR1 SLANKVLVYATANQEKGQRTPYQALDSMDDAWSFRELKAFVRESKT----  
Ssu SLSNKVLVLATANQEKAQRTPYNYLKSATSAWSYREFKDYVTKRKG----  
Smu DREMIRKRLLENYSDLLTKEQVKKLERRHYTGWGRLSAELIHGIRNK----  
Sag DREMIKKRLENYKDLFTESQLKKLYRRHYTGWGRLSAKLINGIRDK----  
Spy\_CRa DREMIEERLKYTAHLFDDKVMKQLKRRRYTGWGRLSRKLINGIRDK----  
Sth\_CR3 DREMIKQRLSKFENIFDKSVLKKLSRRHYTGWGRLSAKLINGIRDK----  
Lin DKRMIKEQLQQFSDVLDGVVLLKLERHYTGWGRLSAKLLMGI RDK----  
Sth\_CR2 SQEAFSRVYVKNYKAGTVKATHVFGDYQCD EIIYNYAALS KNENG----  
Ssa PTSG--RLYVKNKFST--NNAAIHVYIGDRQAANIEDYAGLSQKEIEGNEG  
Mtu QQPQTRRRYAKNKFFAGECLGTGLWVG DYVAQMEFGDYVKR-----

Mbo QQPQTRRRYAKNKFFAGECLGTGLWVG DYVAQMEFGDYVKR-----  
Sep QNNQVRIYSKNKPYIGIGISTNLWMC DYDASQNQDMREKIGISYVD--  
Spy\_CRb KHEAIMERSIRKGGRRDVFLGTRECLGLVDDISQEEYETT VSYNGVNI

Sth\_CR1 --LSNKKKEYLLTEEDISKFDVRKKFIERNLVDTRYASRVV LNALQEHFR  
Ssu --IGKKKCEYLTFEEDINGFEVRSKFIQRNLVDTRYASKVILNALQDYFK  
Smu --ESRKTILDYLI DDGNSNRNFMQLINDDALSFKEEI IAKAQVIGETD--N  
Sag --ESQKTILDYLI DDGRSNRNFMQLINDDGLSFKSII SKAQAGSHSD--N  
Spy\_CRa --QSGKTI LDFLKS DGFANRNF MQLIHDDSLTFKEDI QKAQVSGQGD--S  
Sth\_CR3 --KSGNTILDYLI DDGINSNRNFMQLIHDDALSFKKKIQKAQIIGDEDKGN  
Lin --QSHLTI LDYLMNDDGLNRNLMQLINDSNLSFKSII EKEQVTTADK--D  
Sth\_CR2 --LGIKRLAVVRLD VDDLGA AFMAGFSQQGNGQYSTLSRSATFSRSMSLF  
Ssa ETRGIKRLAVLRLD VDNLGA AFMAGFSQAAGSYNTLARS AVFSQQMSLF  
Mtu -ASGIARLGVLR LRDV DNLGQA FTHGFMEQNGKFNTI SR TAAF SRMLS L  
Mbo -ASGIARLGVLR LRDV DNLGQA FTHGFMEQNGKFNTI SR TAAF SRMLS L  
Sep REEGVKRLGVVRADIDNLGATFISGIPEK----YNSISRTATLSRQLSLF  
Spy\_CRb LGIMFHSFAYPKDKKTP LKSYFTKTVMKNGVITFKAQSECDIVNTLSSYA

Sth\_CR1 AHKIDTKVSV-----VRGQFTS QLRHHWGIEKTRD TYHHHA  
Ssu ISGIQTKVSV-----VRGQFTS QLRHKWGIEKTR ETYHHHA  
Smu LNQVVS DIAG-----SPA I KKGILQSLKIVDEL VKIMG-HQ  
Sag LKEVVGELAG-----SPA I KKGILQSLKIVDEL VKVMG-YE  
Spy\_CRa LHEHIANLAG-----SPA I KKGILQTVKVVDEL VKVMGRHK  
Sth\_CR3 IKEVVKSLPG-----SPA I KKGILQSLKIVDEL VKVMGGRK  
Lin IQSIVADLAG-----SPA I KKGILQSLKIVDEL VSVMG-YP  
Sth\_CR2 FKVYINQFAS-----DKKLSII YAGGDDVFAIGSWQD  
Ssa FKFHINHFAE-----GKNLTII YAGGDDVFAIGSWQD  
Mtu FRQHINYVLARPKLRPITGD----DPA RPREATII YSGGDDV FVVGAWDD  
Mbo FRQHINYVLARPKLRPITGD----DPA RPREATII YSGGDDV FVVGAWDD  
Sep FKYELNHLEN-----YQITAI YSGGDDLFLIGAWDD  
Spy\_CRb FKAPEEIKSVNDECM EYDAMEKGENMDFFTSLKTYEKAELADLV DHQKR

Sth\_CR1 VDALIIAASSQLNLWKKQKNTLVS-YSEDQLLDIETGE-----LIS---  
Ssu VDALIIAASSQLRLWKKQESPLVVDYQEGRQVDLETGE-----ILELT-  
Smu PENIVVEMARENQFTNQGRRNSQORL KGLTDSIKEFGS----QILKEHP-  
Sag PEQIVVEMARENQFTNQGRRNSRQRYKLLDDGVKNLADLNGN ILKEYP-  
Spy\_CRa PENIVVEMARENQFTNQGKNSRERMKRIE EGIKELGS----QILKEHP-  
Sth\_CR3 PESIVVEMARENQFTNQGKNSQORLKRLEKSLKELGS----KILKENIP  
Lin PQTIVVEMARENQFTGKGNNSRPRYKSLEKAIKEFGS----QILKEHP-  
Sth\_CR2 IIAFTVELRENFIKWTNGKLTLSAGIGLFADKTPIRLMAHQ TGELEEA  
Ssa VIDFAVDIRQKFI AFTNGKLTLSAGVGLYPDKTPIHLMALDAGQLEEA  
Mtu VIEFGIELRERFHEFTQGKLTVSAGIGMFPDKYPI SVMAREVGDLEDA  
Mbo VIEFGIELRERFHEFTQGKLTVSAGIGMFPDKYPI SVMAREVGDLEDA  
Sep IIEASIIYINDKFKEFTLDKLTLSAGVGMFSGKYPVSKMAFETGRLEEA  
Spy\_CRb NNEPVLPIYHTSLKSNKNIISVKLDKDGQFHKAEFMADKQMIIFPVTA

Sth\_CR1 -----DDEYKESVFKAPYQH FVDTLKSKEFEDSILFSYQVDSKFN RKI  
Ssu -----DEQYKELVYQPPYQGFVNTISSAFDNEILFSYQVDSKVN RKI  
Smu -----VENSQ LQNDRLFLY YLQNGRDMYTGEELDI DLSQYDIDHII  
Sag -----TDNQALQNERLFLY YLQNGRDMYTGEALDIDNLSQYDIDHII  
Spy\_CRa -----VENTQLQNEKLYLY YLQNGRDMYVDQELDINRLSDYDVHIV  
Sth\_CR3 AKLS---KIDNNALQNDRLYLY YLQNGKDMYTGDLDIDRLSNYDIDHII  
Lin -----TDNQELRNNRLYLY YLQNGKDMYTGDLDIHNL SNYDIDHIV  
Sth\_CR2 GN-----EKDSISLFS SDYTFKFRFITNVYDDKLEQIRYFFNHQDERGK  
Ssa SN-----GKDSISL FNERYTF SFDDFIDEIYKGLKDIRRYFSGQKERGI  
Mtu SLP-----GKNVALFDREFTFGWDELLSKVIEEKYRHIADYFSGNEERGM  
Mbo SLP-----GKNVALFDREFTFGWDELLSKVIEEKYRHIADYFSGNEERGM  
Sep TG-----EKNQISLWLQEKVYNWDEFKKNILEEKLLVLQGFQSTDEHGK  
Spy\_CRb DSVARS GSHPAHPPLVDFAYYSAEMGQIQYDSFHKQLNNWIDYCEE G DV

Sth\_CR1 SDATIYATRQAKVGK-----DKADETYVLGKIKD  
Ssu SDATIYATR NAQLGK-----DKTEGIYVLGKIKD  
Smu PQA--FIKDNSIDNR-----VLTSSKENRGKSDD  
Sag PQA--FIKDNSIDNR-----VLTSSAKNRGKSDD  
Spy\_CRa PQS--FLKDDSIDNK-----VLT RSDKNRGKSDN  
Sth\_CR3 PQA--FLKDNSIDNK-----VLTSSASNRGKSDD

Lin PQS--FITDNSIDNL-----VLTSSAGNREKGGD  
Sth\_CR2 NFIYKLIPELLRNYDR-----MNMARLAYYLTRLEELTRETDR  
Ssa NFLYRLVELLQLNDKTMKYGYGPEDDRRMNVARLAYLLARMEDEAGKEGK  
Mtu AFYKLELLAERDD-----RITKARWVYFLTRMRNPTG--DT  
Mbo AFYKLELLAERDD-----RITKARWVYFLTRMRNPTG--DT  
Sep AFYKMLALLRNNEA-----INARLAYLLARS  
Spy\_CRb KKFLTFVQQFILKPEFLTLILDLSLIG-----PDYQHNQLKVTFCDA

Sth\_CR1 IYTDQGYDAFMKIYK-----DKSKFLMYRHDPQT-----  
Ssu IYQAGYEAFMKRYTK-----DKTSFLMYHKDLDT-----  
Smu VPSKDVVVRKMSYWSK-----LLSAKLITQRKFDN-----  
Sag VPSLEIVKDCVKVFWKK-----LLDAKLMSQRKYDN-----  
Spy\_CRa VPSEEVVKKMKNYWRQ-----LLNAKLITQRKFDN-----  
Sth\_CR3 VPSLEVVKRKRFTWYQ-----LLKSKLISQRKFDN-----  
Lin VPPLEIVRKRKVFWEK-----LYQGNLMSKRKFDY-----  
Sth\_CR2 DKFKTFKNLFYSWYTNKDDKDRKEAELALLLYIYEIRKDMTILTD----  
Ssa EHFREFKNAFWNWYKS--SSKTQREAEFALIYYLYEIRKAMKLERHKMMAP  
Mtu APFQQFANRLHQWFQD--PTDAKQLKTALHLYIYRTRKEE-----  
Mbo APFQQFANRLHQWFQD--PTDAKQLKTALHLYIYRTRKEE-----  
Sep KMNEDFTSKI FNWAQN--DKDKNQLITALEYYYIQIREADLT-----  
Spy\_CRb TGKEKLIDLSACFLEFSIDQFQGFKNESVSTFKALHQSYIS-----

..

Sth\_CR1 -----FEKVI  
Ssu -----WEKVI  
Smu -----LTKAE  
Sag -----LTKAE  
Spy\_CRa -----LTKAE  
Sth\_CR3 -----LTKAE  
Lin -----LTKAE  
Sth\_CR2 -----ENYVDIAE  
Ssa YEKNRNRNRTNGRNQFQNNRSKGSYSSQSNKQKFFKLDPPILTDYVVKAD  
Mtu -----SEMSVIQ  
Mbo -----SEMSVIQ  
Sep -----FAHEVV  
Spy\_CRb -----FVEAN

Sth\_CR1 EPILENYPNKQINEKGKEVPCNPFLKYKEEHGYIRKYSKKGNGPE-----  
Ssu EIIIRDY--REYDEKGEIG--NPFERYRRENGYVKKYSRKGNGTA-----  
Smu RGGLTDDDKAGFIKRQLVETRQITKHVARILDERFNTEEDENNKK-----  
Sag RGGLTSDDKARFIQRQLVETRQITKHVARILDERFNNELDSKGR-----  
Spy\_CRa RGGLSELDKAGFIKRQLVETRQITKHVAQILD SRMNTKYDENDKL-----  
Sth\_CR3 RGGLSPEDKAGFIQRQLVETRQITKHVARLLDEKFNKKDENNRA-----  
Lin RGGLTEADKARFIHRQLVETRQITKNVANILHQRFNYEKDDHGNT-----  
Sth\_CR2 KAILKLERNTRNRKN--PDAFFLTTSKLRNLLSTLSTLFDESKVK---EY  
Ssa LVIHTLSDDKQLNNGKIKFKLTSTQIRNLAALTSNLFDESKTKN---DI  
Mtu DDYVKQAEVIRGLPKKNGFELTTQLRVLLSLTAQLFDEAQQSANPTLP  
Mbo DDYVKQAEVIRGLPKKNGFELTTQLRVLLSLTAQLFDEAQQSANPTLP  
Sep KSNVKNVKDRKGEKQVLFNGLTTSKLRNLMQVNRLYTIAFNSNEDQLN  
Spy\_CRb RENLGICNISGREQLTDKHRGLMGNAKII SVSNKREAYKGRFREREDVF

Sth\_CR1 -IKSLKYYSKLGNHIDITPKDSNNKVVLSVSPWRADVYFNK--TTGKY  
Ssu -IKSLKYDNLGNHIDITPENSNAVVLQSLKFWRTDVYFNK--ETGKY  
Smu -IRQVKIVTLKSNLVSFRKEFELYKVREINDYHHAHDAYLNA--VIGKA  
Sag -IRKVKIVTLKSNLVSFRKEFGFYKIREVNNYHHAHDAYLNA--VVAKA  
Spy\_CRa -IREVKVITLKSCLVDFRKFDFQFYKIREVNNYHHAHDAYLNA--VVGTA  
Sth\_CR3 -VRTVKIITLKSTLVSQFRKDFELYKVREINDYHHAHDAYLNA--VVASA  
Lin -MKQVRIVTLKSALVSQFRKQFQLYKVRDVNDYHHAHDAYLNG--VVANT  
Sth\_CR2 DDLDRIAYLVRVQFVYQAGREIAVKDLIEKAQILEALKEIKD---RETLO  
Ssa EELREKISYLRIFVYQSGREPAVEDFVKKAGLLEALTEIQD---IPSLQ  
Mtu RQLKEKVQYLRVRFVYQSGREDAVKT FVRNAKLEALEGIGDS--RDGLL  
Mbo RQLKEKVQYLRVRFVYQSGREDAVKT FVRNAKLEALEGIGDS--RDGLL  
Sep EEFIDELEYLKI FYEAGREKSVDEFLLKKTLMFPPIIDRVIKKESKFFL  
Spy\_CRb SVGYETSEKIHMLKYLLENKNTSTWLGSSQYLINWFSDDLTN--DSRLD

..

Sth\_CR1 EILGLKYADLQFEKGTGYKISQEKYNDIKKKEGVDSDFEKFPLYKNDL  
Ssu EFLGIKYSDLSEFEKGTGEYGISQEKYDSIKIAEGVAKKSIFKFTLYKQDL



Smu LLG--VYPQLEPEFVYGDYPHFH-GHKENK-----ATAKFFYSNIM  
Sag ILT--KYPQLEPEFVYGDYPKYN-SYKTRKS-----ATEKLFYYSNIM  
Spy\_CRa LIK--KYPKLESEFVYGDYKVD--VRKMIKSEQEIGKATAKYFFYSNIM  
Sth\_CR3 LLK--KYPKLEPEFVYGDYPKYN-SFRERKS-----ATEKVYFYSNIM  
Lin LLK--VYPQLEPEFVYGDYHQFD-WFKANK-----ATAKQFYTNIM  
Sth\_CR2 RFCRYMEALVAYFKFYG--GKD-MTFAKIKFSAQIRLETGLHIGGSDAFA  
Ssa RFCRYMEALVAYFKFYG--GRDQMTYSKVKISGIELKSGLHIGTSNAFA  
Mtu RFCRYMEALVAYFKFYG--GRDQMTYSKVKISGIELKSGLHIGGAGDGF  
Mbo RFCRYMEALVAYFKFYG--GRDQMTYSKVKISGIELKSGLHIGGAGDGF  
Sep DYCKYFEALVAYAKYYQ---KEDMYSKIKISGTIEVVTGLHIGGGESS  
Spy\_CRb IVSFI FDDGLEEDDDDDT P P VITLATEDNKRIGKSF IKGQKLFANDATYY

Sth\_CR1 LLVKDTETKEQQLF RFLSRTMPKQKHVELKPYDKQKFE GGEALIKVLGN  
Ssu LFIKDIENNFGLLRFTSKND-TSKHYVELKPYDKNKFGTEEP LLPVLGN  
Smu NFFK-----KDDVRTD-KNGEIIWKKDEHISNKKKQVQV  
Sag NFFKTKVT LADGT VVVKDDIEVNNDTGEIVWDK KKH FAVR KVL SYPQNN  
Spy\_CRa NFFKTEITLANGEIRKRPLIETNGETGEIVWDKGRDFATVRK VLSMPQVN  
Sth\_CR3 NIFKKSISLADGRVIERPLIEVNEETGESVWNKESDLATVRRVLSYPQVN  
Lin LFFAQK-----DRIIDENGEILWDK-KYLDTVKVMYSYRQMN  
Sth\_CR2 AIGAIDSPVIKDPITNIP IIPGSS LKGMRTLLAK---VYNEKVAEKPSD  
Ssa AIGATNNPI IKDPLTNLPYIPGSTLKGKMRSLLYRT--DYN SNTTEKLSK  
Mtu AIGAVDKPVVRDPLSRLPMIPGTS LKGVRTLLSRQYGADTETFYRKPNE  
Mbo AIGAVDKPVVRDPLSRLPMIPGTS LKGVRTLLSRQYGADTETFYRKPNE  
Sep MIGAIDSPVVRDLQTKLP IIPGSS IKGMRNLLAKHFLKMKQESHNQDD  
Spy\_CRb VAILNKTSNGRIALKYFRQLQASQLLTNLNKWQETYSWESRSKFGKSRRL

Sth\_CR1 VANSQCCKKG-LGK-----SNIS IYKVRTDVLGNQHI-----  
Ssu VAKSGQCIKG-LNK-----SNIS IYKVRTDILGYRHF-----  
Smu IVKKVEEQTGGFSK-----ESILPKGNSDKLI PRKTKKFY---  
Sag IVKKTEIQTGGFSK-----ESILAHGNSDKLI PRKTKDIY--  
Spy\_CRa IVKKTEVQTGGFSK-----ESILPKRNSDKLI ARKKD-----  
Sth\_CR3 VVKKVEEQNHGLDRG-----KPKGLFNANLSSKPKPNSNENLVG-  
Lin IVKKTEIQKGEFSK-----ATIKPKGNSSKLI PRKTN-----  
Sth\_CR2 DSDILSRLFGNSKDK-----RFKMGRLIFRDAFLSNADELDSL G-  
Ssa DSLEISRLFGNSE-----TYKIGRLVFRDAFLNNKEELGKR--  
Mtu DHAHIRRLFGDTE-----EYMTGRLVFRDTKLTNKKDLEARG-  
Mbo DHAHIRRLFGDTE-----EYMTGRLVFRDTKLTNKKDLEARG-  
Sep E--RVLRFLFGSSEK G-----NIQRARLQISDAFFSEKTEKHFQON  
Spy\_CRb TPTFFHDILNVS YGVD RDRFLELDNDNFKSDQIQKLVASLIDGK PMPQSIV

Sth\_CR1 -----IKNEGDKPKLDF--MTWRVVHVSQSEKMR LKLDNLLVQ-----  
Ssu -----IKQEGEHPQLKFKMTWRIVHIHQSEKMR LKLDNLLVIK-----  
Smu -----WDTKKYGGFDSPIVAYSILVIADIEKGKSKKLTVKALVG-----  
Sag -----LDPKKYGGFDSPIVAYSVLVADIKKGAQKLTVTTELLG-----  
Spy\_CRa -----WDPKKYGGFDSPTVAYSVLVAVKVEKSKKLSVKELLG-----  
Sth\_CR3 AKEYLDPKKYGGYAGISNSFTVLVKGTEIEGAKKKITNVLEFQG-----  
Lin -----WPMKYGGLDSPNMAYAVVIEYAKGK---NKL VFEKKIIR-----  
Sth\_CR2 VRSYTEVKFENTIDRI TAEANPRQIERAIRNSTFD FELIYEITD-----  
Ssa VSTYTEVKFENTINRITAEATPRQVERAIRESEFAFELIYSIQE-----  
Mtu AKTLTEVKFENAINRVTAKANLRQMERVIPGSEFAFSLVYEVSGFTPGEE  
Mbo AKTLTEVKFENAINRVTAKANLRQMERVIPGSEFAFSLVYEVSGFTPGEE  
Sep DIAYTETKFENTINRLTAVANPRQIERVTRGSEFDFVFIYNVDE-----  
Spy\_CRb KKLGNVVKERHRYRKHVYQVEQVCLAILHKQNGEEFSPMLDHTN-----

:

Sth\_CR1 -----KMQEFTVPLSDISIIVAEGGDTVVTLRLLSALS  
Ssu -----KQGEFTIPLSDISIIVAEGGDTVVTLRLLSALS  
Smu -----VTIMEKMTFERDFVAFLEKGYRNVQEEENIKLP  
Sag -----ITIMERSRFEKNPSAFLESKGYLNIRADKLIILP  
Spy\_CRa -----ITIMERSRFEKNPIDFLEAKGYKEVKKDLIKLP  
Sth\_CR3 -----ISILDRINRYRDKLNFLEKGYKDI--ELIIELP  
Lin -----VTIMERKAFKDEKAFLEEQYRQP--KVLAKLP  
Sth\_CR2 -----ENENQVEEDFKVIRDGLKLELDYLGSGSRGYGKVAFEKLLKATT  
Ssa -----KELTEVEKDMEILKAGFELLEWDYIGSGSRGYGKVCFKNFVKT  
Mtu QKASLPSSDEI IEDFNAIARGLKLELDYLGSGSTRGYGQVKF SNLKARA  
Mbo QKASLPSSDEI IEDFNAIARGLKLELDYLGSGSTRGYGQVKF SNLKARA  
Sep -----ESQVEDDFENIEKAIHLLENDYLGSGSTRGNRIQFKDNTNIET  
Spy\_CRb -----QNRSYLFGRLLAIFELIETLRYGLDGNNDRITNAERYWTAY

Sth\_CR1 KYNIALVVCNEHLPTG-----IYHSQNGHFRAYKRLKEQ-L  
Ssu KYNIALIVCDNHHLPTG-----IYHSQNGHFRAYKRLQEQ-L  
Smu KYSLFKLENGRKRLLAS-----ARELQKGNELVLPNHLGT-L  
Sag KYSLFELENGRRRLLAS-----AGELQKGNELALPTQFMK-F  
Spy\_CRa KYSLFELENGRRRLLAS-----AGELQKGNELALPSKYVN-F  
Sth\_CR3 KYSLFELENGRRRLLAS-----AGELQKGNELALPSKYVN-F  
Lin KYTLYECEEGRRRLLAS-----ANEAQKGNQOVLPHLVT-L  
Sth\_CR2 VFGNYDVKTLNELLT-----AEVMTYKLYIMTFQN-A  
Ssa VFGFDEYRIKALKPFTNDES DGGGSTE SPDSEIKMAYQLYKLDKFS-A  
Mtu AVGALDGSLLLEKLNH-----ELAAVMNSRLFRFDFDR-T  
Mbo AVGALDGSLLLEKLNH-----ELAAVMNSRLFRFDFDR-T  
Sep VVGEYDSTNLK-----IKMTLATKVKFLSFKTPV  
Spy\_CRb TGQPTKLMMLLENKIKPYEPLKLNRRGSWMKLEKEKEEILELLNPLET

Sth\_CR1 DWSQKQKD-----KAWQIVTYKINNQEDV--LAMFEKSLDNIRLL  
Ssu SWAPLQKD-----KLWQIIIFKITNQQDV--LAMQEKSLSTIQLL  
Smu LYHAKNIHKVDE-----PKHLDYVDKHKDEFKEL--LDVVSFNFKYTLA  
Sag LYLASRYNESKGPKEIEKKQEFVNQHVSYFDDI--LQLINDFSKRVLILA  
Spy\_CRa LYLASHYEKLLKSPEDNEQKQLFVEQHKHYLDEI--IEQISEFSKRVLILA  
Sth\_CR3 LYHAKRISNTIN-----ENHRKYVENHKKFEEL--FYIILEFNENYVGA  
Lin LHHAANCEVSDG-----KSLDYIESNREMFael--LAHVSEFAKYTLA  
Sth\_CR2 HFGSGTLDSSKLTFSADRIFSA LVLES LKMGKLD--AFLAEANQDKFTLT  
Ssa HFGEGHLDSDVMTFTAARLYSALVLEAIKAGVLD--EFENLSRQDEFVLT  
Mtu HFGDHGLESSTISCPADTLYSALCVEALRMGGQQ--LLGELVACSTLRLT  
Mbo HFGDHGLESSTISCPADTLYSALCVEALRMGGQQ--LLGELVACSTLRLT  
Sep HFGKRLSDGEMTITADTLFSALFIETLQLGKTDWLLNDLIISDTFPYE  
Spy\_CRb ETMEKPLDYRFIFGYAENKYYTKQNTTEVTESEEMLEHKIDFMVTLEVK

Sth\_CR1 SDYKEQIEPGDRTNREGHAAKVYFNELEFG-----KQFVRVTQ  
Ssu SDYREHIELGDRTNREGHAAKVYFNELEFG-----KQFVRLTQ  
Smu EGNLEKIKELYAQQN-GEDLKE LASSFIN-----LFTFTA  
Sag DANLEKINKLYQDNKENISVDELANNIIN-----LFTPTS  
Spy\_CRa DANLDKVL SAYNKHR-DKPIREQAENIIH-----LFTLTN  
Sth\_CR3 KKNKGLLNSAFQSWQ-NHSIDELCSSF IGPTG-----SERKGLFELTS  
Lin EANLNKINQLFEQNK-EGDIKAI AQSFVD-----LMAFNA  
Sth\_CR2 DAFPPQFGFFLP-KPIGYPKHDQIDQSV DVKEVRRQAKLSKQLFLALEN  
Ssa DAFPPMGAPYLP-KPIGYPLLDKVNREDIIKQREEAKKAKKLAFLIKLGD  
Mtu DLLPYPVGPDYLYPKPLHSVRS DGS SMQKLAKKIGFLPAAQLGSFLDGT  
Mbo DLLPYPVGPDYLYPKPLHSVRS DGS SMQKLAKKIGFLPAAQLGSFLDGT  
Sep NELYYLPKPLIKLDSKEDNHKAFKLLKYVPVHHYNYLNGELSAEDATD  
Spy\_CRb EANANGDPLNGNMPRTDAKGYGVMSDVS IKRKRIRNRLQDMGKISFVQANE

Sth\_CR1 KEADVINA GLNYGYAIMR--AQMARIVAGYGLNGLLGI FHKNEYNQFNLV  
Ssu QETDAVNAGLNYGYTIFR--AQMARI IAGYGLNALIGIFHKNEYNQFNLA  
Smu IGAPATFKFFDKNIDRKR-YTSTTEILNATLIHQ SITGLYETRIDLNLKLG  
Sag LGAPAAFKFFDKIVDRKR-YTSTKEVLNSTLIHQ SITGLYETRIDLGLKLG  
Spy\_CRa LGAPAAFKYFDTTIDRKR-YTSTKEVL DATLIHQ SITGLYETRIDLSQLG  
Sth\_CR3 RGSAADFEFLGKIPRYRDYTPSSLLKDATLIHQSVTGLYETRIDLAKLG  
Lin MGAPASFKFFETTIERKR-YNNLKELLNSTIIYQSITGLYESRKRLLDDMG  
Sth\_CR2 VDDYLNGLFENEHVAIDTVTKNQPHKDG NLYQVATFRFSNDTSLYVIA  
Ssa FDCFLSGNSIVGESLATSINTKNQPFQDGNLYQVAVHFD-KSSLYFIA  
Mtu DLKELAAQTKIGVHAVSAKAAIHNGKADADPYRVGYFRFELDAGLWLLA  
Mbo DLKELAAQTKIGVHAVSAKAAIHNGKADADPYRVGYFRFELDAGLWLLA  
Sep LNDIFNIGYFSLQT-KVSLIAQETDSSADSEPY SVGTFTFPEAGLYFIA  
Spy\_CRb RIEDDFRSLEKRF SQHFTAKTPDKEIEEKANALWFDVRAFGQVFTYLKKS

Sth\_CR1 DDLMEPFRQIVDVVV-----YDNLRDQEFK---YEYRLGLTDLNNAKIK  
Ssu DDLMEPFRQIVDVVV-----YMNLRADFLT---YQHRLELTNLLNAKIR  
Smu GDMG-WRTVVVNTHS-----KLSYKNNHLIFKDAYQTEMIHLSEIDILL  
Sag EDMAGWRTVVVNTHS-----KLSYKNNHLIFKDSYQTEMIHLSEIDILIM  
Spy\_CRa GDMAGWRTVVVNTHS-----KLSYKNNHLIFKDAYKTEMIHLSEIDILL  
Sth\_CR3 EGMAGWRTVVVNTHS-----KLSYKNNHLIFRNSYKTEMIHLSEIDILL  
Lin -----WRTVVVNTHS-----KLSYKNNHLIFKDAYQTEMIHLSEIDVLL  
Sth\_CR2 NESDLLNELMSSIQY---SGLGGKRSSGFRFELD-IQNIPELSDRLT  
Ssa NQSDLLDRLLESIQF---SGIGGKRSSGYGGFTLDKTVQQPLDFFKRLT

Mtu TGSESELGLLTRLLKGI--SALGGERTSGFGAFNLTESEAP----AALTP  
Mbo TGSESELGLLTRLLKGI--SALGGERTSGFGAFNLTESEAP----AALTP  
Sep KGSEETLDHLNNTALQYSGLGGRNAGYQGFEYEIINNQQ--LSKLL  
Spy\_CRb IGVIRGPVSI SAKSLEPIVISSLQITRSTNGMEAKNNSGRSSDTMGTKHF

Sth\_CR1 YGKETCSVTVMADKYVKGFYKIKYISEKDS-----SKFHCPVVSSLEWRK  
Ssu YGKENCSTVMADKFKVGFIRCIEDKDT-----NQFFCPVVSSLEMEK  
Smu ETTDIVLSTMLIKRLVDENILVIFCDDKRLPTAMLMPYARHDSLSLQLSH  
Sag ETTDIVLSTMLIKRLVDENILVIFCDDKRLPTAMLMPYARHDSLSLQLSR  
Spy\_CRa ETTDIVLSTMLVKRLVDENVLVI FCDDKRLPTAMLMPYGRHDSLSLQLGK  
Sth\_CR3 ETTDIVLSTMLVKRLVDENILVIFCDDKRLPTAFLTPYARHDSLSLQIAR  
Lin ETTDITLSTMLINCLVAENILILFCDDKRLPIGKVLPHYGRHDSLSLQLS-  
Sth\_CR2 KNHSDKVMSLTALPVADLEEAMEDGHYLLTKSSGFAF'SHATNEN-YRK  
Ssa VKYTGKVMALTTSLPVSELKVAMNEGRYLLKKSSGFAFSEETESN-YRK  
Mtu TVDAASLMTLTTSLPTDDELEAALAGATYRLVKRSGFVASSTYADMPLRK  
Mbo TVDAASLMTLTTSLPTDDELEAALAGATYRLVKRSGFVASSTYADMPLRK  
Sep NQNGKHSILLSTAMAKKEEIESALKEARYILTKRSGFVQSTNYSEMVLVK  
Spy\_CRb VDYGVYVLKGSINAYFAEKTGFSQEDAEAIKEVLVSLFENDASSARPEGS

Sth\_CR1 -MRYEALR-----LLCFFDLPMESKDEKRIYRNF  
Ssu LMRYDAMR-----LLCFFDLPMETTQEKQRYLRF  
Smu QISWTEEVKCDVWTTIIAQKILNQSCYLGECFYFEKSQSIMDLYHDLPEFF  
Sag QMSWIEDVKADVWTSIIAQKILNQSFYLGECSEFEKSQSIMNLYHDLPEFF  
Spy\_CRa QMSWSETVKSQVWTTIIAQKILNQSCYLGACSYFEKSQSIMDLYHGLENF  
Sth\_CR3 QIAWKENVKCEVWTAIIAQKILNQSYLLGECSEFEKSQSIMELYHGLERF  
Lin -----  
Sth\_CR2 QDLYKFASGSTFSKTFEGQIVDVRPLD-FPHAVLNYAKPLFFKLEV--MK  
Ssa QNLYTFKAGSTFSKTYNGQICDVKPSDEFPHSVWHYAKPLFYILEESKMK  
Mtu RDIYKFAAGSVFSRPFQGGILDVSLGG--NHPVYSYARPLFLALPESAA  
Mbo RDIYKFAAGSVFSRPFQGGILDVSLGG--NHPVYSYARPLFLALPESAA  
Sep SDFYSFSSGVSFKNIFNGDIFNVGHNG--KHPVYRYAKPLWLEVMTIKN-  
Spy\_CRb MRVCEVFWFTHSSKLGNVSSARVFDLLEYHQSIEEKSTYDAYQIHLNQEK

Sth\_CR1 RKELISNGFEMLQFSVYVRTCPNRSFANKFYKCLK--MSNLPAGNVRLLA  
Ssu RKELIANGFEMLQFSVYVRTCPNRSFATKFKYKCLK--QSHLPAGNVRLLA  
Smu DPSNREGHSARIYFNTLFGNVFSREQDNDINAGLD--YGYTLLLSMFARE  
Sag DPSNREGHAARIYFNTLFGNDFSREQDNPINAGLD--YGSLLLSMFARE  
Spy\_CRa DPSNREGHAARIYFNTLFGNDFSRLDLEHPINAGLD--YGYTLLLSMFARE  
Sth\_CR3 DPSNREGHSARIYFNTLFGNDFTRSDNDINAALD--YGYTLLLSMFARE  
Lin -----  
Sth\_CR2 NDYRT-FKLSLLTLAPIHIGNGEKYTSREFIYENK--KFYFPDMGKIFYNK  
Ssa TKYRK-FKLTWLTLGPVHIGSGQLHTAREYILEGD--EYFFPDMTLLYDE  
Mtu NTYLKPFELTLRCLGPVFIGSGEKRTSKEYHVVEGD--RVYFPDMELLYAD  
Mbo NTYLKPFELTLRCLGPVFIGSGEKRTSKEYHVVEGD--RVYFPDMELLYAD  
Sep -----YEVVIKTLGPIHIGSGQVMKKQDYIYDFYNSKVYMINTKLVKF  
Spy\_CRb LAKYEAKGLTLEILEGLMVYAEDDYLMLSGIQHFQFCKRQWALIHIEQQW

Sth\_CR1 VTEKQFSEMTEIIGGKTKQEEIVSDNKLVAIMKF----FVRHPYKDRIEL  
Ssu VTEKQFSEMVLIVGGKTRQEEAISDRKLVIMKW----LITHVVLNPIPI  
Smu VVVGCMQTQFGLKHANQFNQFNASDIMEPFRPI----VDRIYVENRNNS  
Sag VVKCGCMTQFGLKHANQFNQFNASDIMEPFRPI----VDRIYENRQSD  
Spy\_CRa VVVGCMQTQFGLKHANQFNQFNASDIMEPFRPL----VDKIYVENRNQP  
Sth\_CR3 VVVGCMQTQIGLKHANQFNQFNASDIMEPFRPI----IDRIYQNRHNN  
Lin -----KIRPY----LQVRVFAN----  
Sth\_CR2 MVEKRLAEKFEAFLIQTRPNARNNRLISFLNDNR----IAER--SFGGYS  
Ssa LIKRGIDEKFKQFLIDS--DNKTNRISDFLAEHG----ITKR--NFGGYR  
Mtu IPAH-KRKSFEAFVMNTDGAQATAPLKEWVEPNA----VKLDPAKHRYE  
Mbo IPAH-KRKSFEAFVMNTDGAQATAPLKEWVEPNA----VKLDPAKHRYE  
Sep LKRKNLLYTYQNFLRYPKPNPRENGLKDYLDQON----VKQSEWEAFVSY  
Spy\_CRb LDNEATAHGQVHLTKADNPYIKEKRKELLVSRAMPISAEGLGSGIMDVV

Sth\_CR1 NIGAITQIVGQNNELKYYILQILSWYFGGKYSREDSLIFDYEEPTILDE  
Ssu HVGQFTQIVGQNYELKYYIWQILIWYFGGKYSSEDLILFNQEEPVISQD  
Smu FIKIKRELFSMFSDTYLYNNKEMYLNTNIVSDYTKKVIKALNNDGKGVPEF  
Sag FVKMKRELFSMFSSETYSYNGKEMYLNTNIVSDYTKKVIKALNSDNGNGIPEF  
Spy\_CRa FPKIKRELFTLFSDTFSYNGKEMYLNTNIVSDYTKKVIKALNNEGKGVPEF

Sth\_CR3 FVKIKKELFSIFSETYLYNGKEMYSNIVSDYTKKVIKALNQLGEEIPEF  
Lin -----  
Sth\_CR2 ISETGLES DRPNPS-----AGAINVKNKFI RDAFGNPIY PGSSSLKGA  
Ssa LKATGLEKPKGENVPRNQETTDPEINGVHQFMRDCYGNPYVPGSSSLKGA  
Mtu VKIGSIEPRRASRGRGGRMTRKKLTLNEIHAFIKDPLGRPYVPGSTVKGM  
Mbo VKIGSIEPRRASRGRGGRMTRKKLTLNEIHAFIKDPLGRPYVPGSTVKGM  
Sep SEKVNQGGKYGNTN-----PKPLNDLHLMVRDQGNKVYLPGSSIKGA  
Spy\_CRb EFYKDDQGVSLRGRKRWLPKVVEYKRKPKKDRDITVQLVAQTMCLEET

Sth\_CR1 AREIVKRSSYHYIDISTFKDLLEQMEYKKGTLAHGYLRKIVNQVDIVGH-  
Ssu S-EAIKRNAFKIIISIAEVDILEQISYKKGTTIGFSYLSLKMQNIIEIIEE-  
Smu RIM-----RMILMFDMPDTAEERKAYRKRFRKFLLESGFIMHQFSVYSK-  
Sag RIMSRYRMRMILMFDMPDTAEERKAYRKRFRKFLLESGFIMHQFSVYSK-  
Spy\_CRa RIMSRYRMRMILMFDMPDTAEERKAYRKRFRKFLLESGFIMHQFSVYSK-  
Sth\_CR3 RIMSRYRMRMILMFDMPDTAEERKAYRKRFRKFLLESGFIMHQFSVYSK-  
Lin -----  
Sth\_CR2 IRTILMNTTPKWNENAVNDFGRFPKENKNLIPWGPCKG-----  
Ssa IRTILMNTHHWSTDFKQENKKGKIVE-NKKAIPWGPTRRQRHE-----  
Mtu LRSIYQLQSLVHKRTAQPVVRVPGHQTRHRQYGERFERKELRKSGRPNTR-  
Mbo LRSIYQLQSLVHKRTAQPVVRVPGHQTRHRQYGERFERKELRKSGRPNTR-  
Sep IKTTLVSKYNNENKNDIYSKIKVSDSKPIDESNLAIYQKIDINKSEKSM  
Spy\_CRb LDCDINEGCLLYHSVNQRVIVPMTSALRQEVKELAAEMHEVYQSOMLPKA

Sth\_CR1 LEKINEQVELIEEAMNRHINLNCGQVEYHLENLPLTLDQLLT-----  
Ssu LEILNYHLHKIAQKVNSSISLINDEIEYEVGTTDLLPEQILT-----  
Smu LLLNNSANTAMIARLKENNPKKGNITLLTVTEKQFARMYILNGERDTSIA  
Sag LLLNNTANNAMIGRLKVNPNKGNITLLTVTEKQFARMVYLHGERNTSVA  
Spy\_CRa LLLNNTANNAMIGRLREHNPKNITLLTVTEKQFARMYILHGERNNCIA  
Sth\_CR3 LLLNNTANKAMIGRLKANNPKKGNITLLTVTEKQFARMYILYGDKNTSIA  
Lin -----  
Sth\_CR2 --KEYDDLFNAI RVS DSKPFDNKSLILVQKWDYSAKTNKAKPLPLYRESI  
Ssa KIKPFDDIFNEIRVSDSQPLTNDLILVQKWDFTPDDTKPHLSIYREAL  
Mtu PQDAVNDFLQAI RVTDS PALRTSDLLICQKMDMNVHG-KPDGLPLFRECL  
Mbo PQDAVNDFLQAI RVTDS PALRTSDLLICQKMDMNVHG-KPDGLPLFRECL  
Sep LYRECIDVNTIEIKFKLTIEDEIYSINEIEQSIQDFYKNYDKWLVGFKET  
Spy\_CRb AYFKNCQLCSLVDICKPRLSKKTRSVSRVINEAMTSEEMDLMKLLNTLY

Sth\_CR1 -----KN  
Ssu -----KQ  
Smu NSDSRLVFLGEAFPD-----ETMVR  
Sag NSDSRLVFLGDSYDQDMIKINFPILDEPLVLSNATILTIEDVSVYSSLVK  
Spy\_CRa NSDERLVFLGEAFDES MN-LNFSLLDEPIPLRGGTILVLEDVCVFSKIVQ  
Sth\_CR3 NSDERLVFLGENYCDEHMNINFSLLDEPLEINQGTVLVIEDVSVFAQLVK  
Lin -----VTK  
Sth\_CR2 SPLTKIEFEITTTT-----DEAGR-----LIEELGK  
Ssa RPKGKMEFEIITALGFKG----GRAGE-----LVASLGE  
Mtu APGTSISHRVVDTSP TARGGWREGER-----FLETIAE  
Mbo APGTSISHRVVDTSP TARGGWREGER-----FLETIAE  
Sep KGGRRFALEGGIPDVLNQNILFLGAGTG-----FVSKTTH  
Spy\_CRb LTQEDFYVTKEGDNIVIKQEGKVLKRF-----FRIID

Sth\_CR1 FSPFFTI-----ENKNLSFEWVSNIDKLSLFLLEMLDHLHLQTTTE  
Ssu LTPHFKK-----SRDEIAIEFISNEKKLCFLQLMLNAIMQEQTK  
Smu NLYQYDE-----DSELKFFNRKFKSLKPSSEMLVTDILGYDVNA  
Sag HFYQYDV-----DEHLKLFDDKQKSLKATEMLVTDILGYDVNS  
Spy\_CRa YCYQYEE-----DSELKFFDHKMKTIKESSEIMLVTDILGFDVNS  
Sth\_CR3 EFYQYDE-----QSNLTI FDSKIRSRSELLELITDILGFDINT  
Lin WLYQYDE-----TEELTIFGAKQQPLKSSELMLITDVLGHDINS  
Sth\_CR2 RAQAFYK-----DYKAFFLSEFPDDKI QANLQYPIYL GAGSGA  
Ssa YAQKFYFGVTEDEGYEGYEGYKDFFLKFPNHLIQNNLSYPLYLGGGSGA  
Mtu TAASVNQ-----ARYAEYRAMYPG--VNAIVGPIVYLGGGGAGY  
Mbo TAASVNQ-----ARYAEYRAMYPG--VNAIVGPIVYLGGGGAGY  
Sep YQLKNRKQAKQ-----DSFEILT KFRGTYGKMKI P SNVVALKGT  
Spy\_CRb GIVCFSYLG-----VSSALVKLCTENQINLSFHTPQGRFCGRYIGS

Sth\_CR1 KYLIVLKNIDGFI SEESYTI-----FYRQICHLVKYPNL

Ssu PILLVLKLNDDYLTYSFVR-----IAQYLEELS NKYPYF  
Smu PSLKLVHADLENQFNEKPE-----VKSMVEKLAN TIT--  
Sag APILKLIHGDLENQFNEKPE-----VKSMVEKLAATIT--  
Spy\_CRa STILKLIHADLESQFNEKPE-----VKS MIDKL VATIT--  
Sth\_CR3 SQVLKLLHTDIVSQLNDKPE-----VRSEIDSLVSLIT--  
Lin LATLKLTYADLEQQLNKPE-----VKS MIDKLTATIS--  
Sth\_CR2 WTKTLFKQADGILQRRYSRM-----KTKMVKKGVLKLT KAPL  
Ssa WTKTVFRQADGEVQKRHK-----KMSER GALKLT KAPF  
Mtu RSKTFVTDQDDMAKVLD AQFGKVVK-----HVDKTREL RVSP LVKRTKI  
Mbo RSKTFVTDQDDMAKVLD AQFGKVVK-----HVDKTREL RVSP LVKRTKI  
Sep NQSRHTSYQQGMCKV SFQELN-----NEVLMKILFSPIGNS  
Spy\_CRb TNGNVLLRREHYRLSDREESLEYAKRFILAKISNSRKYLLRFRKDRHQI

:

Sth\_CR1 TFI LFP SQGYL KIDEENS R FVNILSDQ-VEHLYDVEFMYERVMKYPS-  
Ssu NTILFP SQEGYLYL TEATLET VNI VSDR-IEHYPAFTFLYTRYQQSYPS-  
Smu ELIAYECL ENELD LEYDEITILEL IKALGVKIETQSDTIFEKMF EVLQV-  
Sag ELIAYECL ENELD LEYDEITILEL IKALGVKIETQSDTIFEKCFEIIQV-  
Spy\_CRa ELIVFECL ENELD LEYDEITILEL IKSLGVK VETQSDTIFEKCLEILQI-  
Sth\_CR3 DI IMAECIENELDI EYDEITLLEL IKALGVRIETK SCTVFEKIFDILQI-  
Lin ELIGYELLEHELDLE EDEITVIELFKALGIK IETKSDTVFEKLEIIVQV-  
Sth\_CR2 KTVKIPSGNHSLVKNHESFYEMGKANFMKEID-KMRVLISAVGDTDFP-  
Ssa LTV---DGEIELINNAENFYEMGKTCFTITEVATRMKTLITFISQYDPIG  
Mtu DNICYEMGQCELSIRRAEMILFSPIGTADPITALGDGPMLHIVRHYRPV  
Mbo DNICYEMGQCELSIRRAEMILFSPIGTADPITALGDGPMLHIVRHYRPV  
Sep DPWRNDRD GAMLHIVRHYNLDKV VLYFTRTIWEGNENRKGHKIYEWEKII  
Spy\_CRb DTKLFEAVNDEL IWALEMVQAADNKDSL RGI EGQAANQYFRIFNDLV LTD

\*

Sth\_CR1 -----  
Ssu -----  
Smu -----  
Sag -----  
Spy\_CRa -----  
Sth\_CR3 -----  
Lin -----  
Sth\_CR2 -----  
Ssa VKFKHPTKKDETGREKTDNFRRALSIGDIHTYEHDGYQ-----  
Mtu VVLFLSAEIAAFENADRRYSAAITRLAPETDVRIVTYTNPSVHRFDL FVP  
Mbo VVLFLSAEIAAFENADRRYSAAITRLAPETDVRIVTYTNPSVHRFDL FVP  
Sep QTVSPNTEVEII IENVDNAQDYDV FKEKFHKYLKIIEDS-----  
Spy\_CRb KKT-----

Sth\_CR1 -----  
Ssu -----  
Smu -----  
Sag -----  
Spy\_CRa -----  
Sth\_CR3 -----  
Lin -----  
Sth\_CR2 -----RNFHDG-ALIH IKQEY-----RSLK  
Ssa -----QEISDGPALVIKDEL PDKLIVISDEMVKVQENFERTVK  
Mtu VFRNHLVELSAEFPDR TILLNTSSGTPAMQAALVAINVFGIPRTTAVQVS  
Mbo VFRNHLVELSAEFPDR TILLNTSSGTPAMQAALVAINVFGIPRTTAVQVS  
Sep -----YEDCEIILNVTSGTPQME STLCL EYIVYPENK KCVQVS  
Spy\_CRb -----

Sth\_CR1 -----  
Ssu -----  
Smu -----  
Sag -----  
Spy\_CRa -----  
Sth\_CR3 -----  
Lin -----  
Sth\_CR2 KTAR-----  
Ssa TVYR-----  
Mtu TPARALSKPGDRESPDAYDLELMWDANDDNQPGAPNRCFEATS AALGALL  
Mbo TPARALSKPGDRESPDAYDLELMWDANDDNQPGAPNRCFEATS AALGALL  
Sep TPTK-----

Spy\_CRb -----  
  
Sth\_CR1 -----  
Ssu -----  
Smu -----  
Sag -----  
Spy\_CRa -----  
Sth\_CR3 -----  
Lin -----  
Sth\_CR2 -----  
Ssa -----DFIEKFDYKAALDILDQLSDFPN--LKSLREEIRD---  
Mtu -----KKAVQIPVIQNEYVTEGVHEFEA--MYKFVEKILDRED  
Mbo ERANLKQLIVSYDYSAAVTIAADSRLPDQVSNLIRGAMHRSRLEHLVAPK  
Sep ERANLKQLIVSYDYSAAVTIAADSRLPDQVSNLIRGAMHRSRLEHLVAPK  
Spy\_CRb -----DSNAGIEYSNPKDKVEFEIVNEVEKKSEKRCKEINIL-----

Sth\_CR1 -----  
Ssu -----  
Smu -----  
Sag -----  
Spy\_CRa -----  
Sth\_CR3 -----  
Lin -----  
Sth\_CR2 -----  
Ssa -----MSGNDYILNITSGTAQCQAAMYFINFIKDYHTRLARVDSPNGKKTNRSNQ  
Mtu -----FFKDTAFTYDPANKVAEYISALALLAKREQWAEFARSATPAITIVLRAAV  
Mbo -----FFKDTAFTYDPANKVAEYISALALLAKREQWAEFARSATPAITIVLRAAV  
Sep -----SFREAMIRSQILGLIDNYDYEGALNLVSNQ-----  
Spy\_CRb -----

Sth\_CR1 -----NDFPTREGFRMSLET-----  
Ssu -----TSPLGEKEFLNSLRK-----  
Smu -----YKYLNKKKLLVFIN-----  
Sag -----YHYLTKKNLLVFN-----  
Spy\_CRa -----FKYLTKKKLLIFVN-----  
Sth\_CR3 -----FKYLVKKRILVFN-----  
Lin -----YKYLKSKKLLVFIN-----  
Sth\_CR2 -----VVNCLSKKKIAYIREK-----  
Ssa -----GAPYFEEVVLDDLLKKQTAEKEDERKPEIETGEKLNLLQRTYKDFILK  
Mtu -----AKHLPEDRYLDDMGRVDRRKLEREPEIRCALKHPPKSPNAEWYLYTKDWL  
Mbo -----AKHLPEDRYLDDMGRVDRRKLEREPEIRCALKHPPKSPNAEWYLYTKDWL  
Sep -----KSFNRGKLLRKKLLSLTKQIKTHEVFPEINEKYRDDALKKSLFHY  
Spy\_CRb -----FYFQGRSKRPLDCVNALLSFG-----

Sth\_CR1 -----  
Ssu -----  
Smu -----  
Sag -----  
Spy\_CRa -----  
Sth\_CR3 -----  
Lin -----  
Sth\_CR2 -----  
Ssa -----YEYK-----  
Mtu -----ALLRQFAPDRVGALEVLGRFESRVRNTAAHEIVSISEDRIKDGGLPEQ  
Mbo -----ALLR-----  
Sep -----LLLN-----  
Spy\_CRb -----

Sth\_CR1 -----  
Ssu -----  
Smu -----  
Sag -----  
Spy\_CRa -----  
Sth\_CR3 -----  
Lin -----  
Sth\_CR2 -----

Ssa -----AALDILK  
Mtu LLKILARETGADLTLYDRLNDEIRQIDMAPLGMVQLYVSDSVSRISFAD  
Mbo -----MVQLYVSDSVSRISFAD  
Sep -----MRYNRLDVAETLIRVKS  
Spy\_CRb -----

Sth\_CR1 -----  
Ssu -----  
Smu -----  
Sag -----  
Spy\_CRa -----  
Sth\_CR3 -----  
Lin -----  
Sth\_CR2 -----LYDFSRVFKNQSIKSDILS-----  
Ssa ANPDIISNKDDQEKSKKALENMISSVFQKQKVLKELAADSK-----  
Mtu GRVIVWSEELGESQYPIETLDGITLFGFRPTMTTFFIVEMLKRELDIQLFT  
Mbo GRVIVWSEELGESQYPIETLDGITLFGFRPTMTTFFIVEMLKRELDIQLFT  
Sep IAEFILKTYIEIHWPTLIEKDGKPYLNDEDNLSFVYKYN-----  
Spy\_CRb -----

Sth\_CR1 -----VTPYLLT-KMLRQPS  
Ssu -----ISSYLFSSDINRVVS  
Smu -----TLSYFKREEIAQILE  
Sag -----SGAYLTKDEVIKLCE  
Spy\_CRa -----SGAFLTKDEVASIQE  
Sth\_CR3 -----SLSYFSKDEIYQILE  
Lin -----VCAYLTEDELLELRR  
Sth\_CR2 -----FPLDDS--QEKALNYYL  
Ssa -----LKYNDTGEFQKVLNYYL  
Mtu TDGHYQGRISTPDVSYAPRLRQQVHRTDDPAFCLSLSKRIVSRKILNQQA  
Mbo TDGHYQGRISTPDVSYAPRLRQQVHRTDDPAFCLSLSKRIVSRKILNQQA  
Sep -----LLEKRRQNFDVSRILGLPA  
Spy\_CRb -----YSLLTFFECQSALEAVGLDSYVG

Sth\_CR1 LSLVDSVILNINLQLFHFSYRIRYLQK-SDEKLLQKFLESKD-----  
Ssu LADIDLVTLKIVNSLYQYDIKVMYMK-GISKLEENYLS-----  
Smu YIHLSDMVVFLEPRKIDGFAQYILDE-DYFLITESNN-----  
Sag YINLMQKSVLFLEPRRLYDLPQYVIDK-DYFLIGENMV-----  
Spy\_CRa YISLTNLTVLFLEPRELYDFPQYILDE-DYFLITKNMV-----  
Sth\_CR3 YTKLSQADVLFLEPRQIEGIIQQFILDK-DYIILMPYNN-----  
Lin YVSLNQVKVLFVEPRKTEGFSQVILDS-DYFLQVEKGM-----  
Sth\_CR2 MIDVLKEREHIADVLIKAKSLAEFVIE-ETIKKDHEGLIVFDGN-----  
Ssa MIDILNRRGQVTDVLVKAKSFAEFVIG-NYLFRKYERYVKTTSKGFKLNL  
Mtu LIRAHTSGQDVAESIRTMKHS LAWVDR-SGSLAELNGFEGNAAKAYFTAL  
Mbo LIRAHTSGQDVAESIRTMKHS LAWVDR-SGSLAELNGFEGNAAKAYFTAL  
Sep FIDILTILEPNSQLLKEVNAVNDINGLRNSIAHNLDTLNLDKNKNYKIM  
Spy\_CRb FFHTDRPGRASLALDLVEEFRSYIVDRFVFSLINKGQLQKKHFVVKENG

Sth\_CR1 -----  
Ssu -----  
Smu -----  
Sag -----  
Spy\_CRa -----  
Sth\_CR3 -----  
Lin -----  
Sth\_CR2 -----LPKLNPF-----  
Ssa ESLNNDIEISEICDYITQEIKKVNPKGSGFRKSDLM-----  
Mtu GHLVPQEFQGRSTRPPLDAFNSMVSLGYSLLYKNIIGAIERHSLNAYI  
Mbo GHLVPQEFQGRSTRPPLDAFNSMVSLGYSLLYKNIIGAIERHSLNAYI  
Sep LSVEAIKNMLHISFPEIEEEDYNYFEEKNKEFKELLMINKITVELDLP--  
Spy\_CRb ILLTENGRAIFIDLWQKRKHTEVEHPFTKEKVKMLMLLPYVQAQLLAKAIR

Sth\_CR1 -----  
Ssu -----  
Smu -----  
Sag -----

Spy\_CRa -----  
Sth\_CR3 -----  
Lin -----  
Sth\_CR2 -----SFPDKVAHGLSEI  
Ssa -----IHSFRHLVIFLEGRSAIVTSTQKVTELNSKRNNVAHGLAEI  
Mtu GFLHQDSRGHATLASDLMEVWRAPIIDDTVLRLIADGVVDTRAFSKNSDT  
Mbo GFLHQDSRGHATLASDLMEVWRAPIIDDTVLRLIADGVVDTRAFSKNSDT  
Sep --ESIRFQYLGSVLHGVLMDYLSDDIADQLHHEFAYSPLKQRIYHKNKKI  
Spy\_CRb GDLESYPPFMVMMVLVTYDVNTEETPAGRKRLRHVAKLCVDYQGRVQNSVF

Sth\_CR1 -----  
Ssu -----  
Smu -----  
Sag -----  
Spy\_CRa -----  
Sth\_CR3 -----  
Lin -----  
Sth\_CR2 -----DTRLLSRKK--LKQLSENQLLLVDCLG-----IDSSYFNY-YDKQNKEL  
Ssa S---VLQEE--LNELVKGLKLVIAAYSDDKKVYLYQEYFDY-YDQKNQDL  
Mtu GAVFATREA--TRSIARAFGNRIARTATYIKGDPHRYTFQYALDLQLQSL  
Mbo GAVFATREA--TRSIARAFGNRIARTATYIKGDPHRYTFQYALDLQLQSL  
Sep IWEIVCMSDNLFKEVVKLFSSKNSLLKYYQTNIDIQSFQIEKINVQNM  
Spy\_CRb ECSVTPAEFVDIKHRLTQIIDEKTD SIRFYLLGKNWQRRVETLGRSDSYD

Sth\_CR1 -----  
Ssu -----  
Smu -----  
Sag -----  
Spy\_CRa -----  
Sth\_CR3 -----  
Lin -----  
Sth\_CR2 -----TKMLE-----  
Ssa ISCLK-----  
Mtu VRVIEAGHPSRLVDIDITSEPSGAMP---TRSREEYFNLPLKVDDESSGTI  
Mbo VRVIEAGHPSRLVDIDITSEPSGAMP---TRSREEYFNLPLKVDDESSGTI  
Sep NQLLQVEDLSRYVRLNIQTPMSFKYQNSYMI FPDVKRFRS IMIQFDAFF  
Spy\_CRb PDKGVLLL-----

Sth\_CR1 -----  
Ssu -----  
Smu -----  
Sag -----  
Spy\_CRa -----  
Sth\_CR3 -----  
Lin -----  
Sth\_CR2 -----  
Ssa -----  
Mtu GKMFVLVIYDISDNRRRASLAKILAGFGYRVQESAFEAMLTKGQLAKLVA  
Mbo GKMFVLVIYDISDNRRRASLAKILAGFGYRVQESAFEAMLTKGQLAKLVA  
Sep EEYRMYDKETLNFLEKNVNIVDYKLLKSTRFNLEKVKIPSFTEIVFKIKG  
Spy\_CRb -----

Sth\_CR1 -----  
Ssu -----  
Smu -----  
Sag -----  
Spy\_CRa -----  
Sth\_CR3 -----  
Lin -----  
Sth\_CR2 -----  
Ssa -----  
Mtu RIDRFAIDCDNIRIYKIRGVAAVTFYGRGRLVSAEEFVFF  
Mbo RIDRFAIDCDNIRIYKIRGVAAVTFYGRGRLVSAEEFVFF  
Sep PLPFLQLTHFLLKFGFESGSGIKTSLGMGKYSII-----  
Spy\_CRb -----



C

```

Sth_CR1 ---MTWRVVHVQSSEKMRLLKLDNLLVQKMG---QEFTVPLSDISIIVAEGGDTVVTLLRLLS
Ssu ---MTWRIVVHIHQSEKMRLLKLDNLVKKQG---DEFTIPLSDISIIVAEGGDTVVTLLRLLS
Smu ---MGWRTVVVNTHSKLSYKNNHLIFKDAY---QTEMIHLSEIDILLETDDIVLSTMLIK
Spy_CRa ---MAGWRTVVVNTHSKLSYKNNHLIFKDAY---KTEMIHLSEIDILLETDDIVLSTMLVK
Sth_CR3 ---MAGWRTVVVNIHSHKLSYKNNHLIFRNSY---KTEMIHLSEIDILLETDDIVLSTMLVK
Sag ---MAGWRTVVVNTHSKLSYKNNHLIFKDSY---QTEMIHLSEIDILIMETDDIVLSTMLIK
Lin ---MGWRTVVVNSHSHKLSYKNNHLVFKSAY---QTEMIHLSEIDVLIETDDITLSTMLIN
Sth_CR2 ----MSDLYSQRSNYYLSLSEQR I I I KNDNKEIVKEVSI SLVDNVLLFG-NAQLTTQLIK
Ssa ----MADLYIQNSSYSLSISDRKLMIKNQERTMLKAI SLGLIDNILIFG-NSQLSTQLLK
Mtu ----MVQLYVSDSVSRISFADGRVIVWSEELGES-QYPIETLDGITLFG-RPTMTTFFIV
Mbo ----MVQLYVSDSVSRISFADGRVIVWSEELGES-QYPIETLDGITLFG-RPTMTTFFIV
Sep ----MKDVIYVENHYFVTAKENS IKFRNVIDKSEK FYLFEEIEA I I F D H Y K S Y F S H K L V I
Spy_CRb MKKLLNTLYLTQEDFVYVTKEGDNIVIKQEGK-VLKRFPFR I I D G I V C F S -Y L G V S S A L V K

```

: . . . : . . . : . . .

```

Sth_CR1 ALSKYNIALVVCNEHLPTGIYHSQNGHFRAYKRLKEQLDWSQKQKDKAWQIVTYKINN
Ssu ALSKYNIALIVCDNHHLPTGIYHSQNGHFRAYKRLQQLSWAPLQDKLWQII I YFKITN
Smu RLVDENILVIFCDDKRLPTAMLMPPYARHDSLQLSHQISWTEEVKCDVWTTIIAQKILN
Spy_CRa RLVDENVLFVIFCDDKRLPTAMLMPPYGRHDSLQLGKQMSWSETVKSQVWTTIIAQKILN
Sth_CR3 RLVDENILVIFCDDKRLPTAFILTPPYARHDSLQIARQIAWKENVKCEVWTAIIAQKILN
Sag RLVDENILVIFCDDKRLPTAMLMPPYARHDSLQLSRQMSWIEDVKADVWTSIIAQKILN
Lin CLVAENILVIFCDDKRLPIGKVLFPFYGRHDSLQLSKIRPYLQ-----
Sth_CR2 ALSKNKVNYYFYSNVGQFISSIETHRQDEFQKQELQAKAYFEEDFRLEVARSIATTKVRH
Ssa SLSRHGIPVFYFSSKGEFLFSMDSFKADYEQREQAQASFDKSFCLKMSKR IASAKIMN
Mtu EMLKREEDIQLFTTDGHYQGRISTPDVSYAPRLRQQVHRTDDPAFCLSLSKRIVSRKILN
Mbo EMLKREEDIQLFTTDGHYQGRISTPDVSYAPRLRQQVHRTDDPAFCLSLSKRIVSRKILN
Sep KCIENDIAIIFCDKHSFVPTQLISSYGMVNRKRIQSQFQLSGRTKDRIWKKIVINKIFN
Spy_CRb LCTENQINLSFHTPQGRFCGRIGSTNGNVLLRREHYRLSDREE-SLEYAKRIFILAKISN

```

: . . .

```

Sth_CR1 QEDVLAMFEK-----SLDNIRLLSDYKEQIEPGDRTNREGHAAKVYFN---
Ssu QQDVLAMQEK-----SLSTIQLLSDYREHIELGDRTNREGHAAKVYFN---
Smu QSCYLGEFCF-----YFEKSQSIMDLYHDLEPFDPNSREGHSARIYFN---
Spy_CRa QSCYLGACS-----YFEKSQSIMDLYHGLENFDPNSREGHAARIYFN---
Sth_CR3 QSYYLGECS-----FFEKSQSIMELYHGLERFDPNSREGHSARIYFN---
Sag QSFYLGACS-----FFEKSQSIMNLYHDLEPFDPNSREGHAARIYFN---
Lin -----
Sth_CR2 QIALLREFDTDG-----LLDTSYSRFEDSVNDIQKAYSITEIMGYEGR LAKSYFYLLN
Ssa QLNLLKAYDEQG-----LFDEEDFKRFSACESLESAKSISEIMGIEGRIAKSYFYLLN
Mtu QQALIRAHTS-G-----QDVAESIRTMKHS LAWVDRSGSLAELNGFEGNAAKAYFTALG
Mbo QQALIRAHTS-G-----QDVAESIRTMKHS LAWVDRSGSLAELNGFEGNAAKAYFTALG
Sep QTRCLENLH-----NENVKMLGFAKEVSSGDKSNKEAHATRIYFK---
Spy_CRb SRKYLRLFRKDRHQQIDTKLFEAVNDELIWALEMVQAADNKDSLRLGIEGQAANQYFRIFN

```

```

Sth_CR1 ELFGK---QFVR---VTQKEADV INAGLNYGYAIMRAQMARI VAGYGLNGLLGI FHKNEY
Ssu ELFGK---QFVR---LTQQUETDAVNAGLNYGYTI FRAQMARI IAGYGLNALIGI FHKNEY
Smu TLFGN---VFS-----REQDNDINAGLDYGYTL LLSMFAREV VVSGCMTQFGLKHANQF
Spy_CRa TLFGN---DFS-----RDLEHPINAGLDYGYTL LLSMFAREV VVSGCMTQFGLKHANQF
Sth_CR3 TLFGN---DFT-----RESNDINAALDYGYTL LLSMFAREV VVSGCMTQI GLKHANQF
Sag TLFGN---DFS-----REQDNPINAGLDYGYSL LLSMFAREV VVKGCMTQFGLKHANQF
Lin -----
Sth_CR2 LLVPD---DFHFNGRSRRTAEDCFNSALNFGYSILYSCLMGLIKKNGLSLGFVVIKHHQ
Ssa LLVEE---DFQFYSRNRSPLDRFNALNFGYSILYSCFIGLIRKNGLSAGFGVTHQPHT
Mtu HLV PQ---EFAFQGRSTRPPLDAFNSMVS LGYSLLYKNI IGAIERHSLNAYIGFLHQDSR
Mbo HLV PQ---EFAFQGRSTRPPLDAFNSMVS LGYSLLYKNI IGAIERHSLNAYIGFLHQDSR
Sep DLF GK---QFKR-----GRYNDVINSGLNYGYSILRSFINKELAIHGFEMLGKIKHSKE
Spy_CRb DLVLTDKKTFYFQGRSKRPP LDCVNALLSFGYSL LTFECQSALEAVGLDSYVGFHFTDRP

```

```

Sth_CR1 NQFNLVDDLMEPFRQ-IVDVVYDNLRDQEF LKYEYR-----L
Ssu NQFNLADDLMEPFRQ-IVDVVYVMNLRADFLTYQHR-----L
Smu NQFNFASDIMEPFRP-IVDRIVYENRNS---FIKIK-----R
Spy_CRa NQFNFASDIMEPFRP-LVDKIVYENRNQP---FPKIK-----R
Sth_CR3 NQFNLASDIMEPFRP-IIDRIVYQNRHNN---FVKIK-----K
Sag NQFNLASDIMEPFRP-IVDRIIYENRQSD---FVKMK-----R
Lin -----
Sth_CR2 HHATLASDLMEWRPIIVDNTLMELIRNGKLLLSHFENKQD--FILTDEGREIFAWALR
Ssa HHAVALASDLMEWRPIVDDTVMSLIKHGDIRGGAF-----

```

Mtu GHATLASDLMEVWRAPIIDDTVLRLIADGVVDTRAFSKNSDTGAVFATREATRSIARAFG  
Mbo GHATLASDLMEVWRAPIIDDTVLRLIADGVVDTRAFSKNSDTGAVFATREATRSIARAFG  
Sep NPFNLADDIEVFRP-FVDNIVYEIVFKKNIDTFDINEK-----K  
Spy\_CRb GRASLALDLVEEFRSYIVDRFVFLINKQLQKKHFEVKENG-----SILLTEN

Sth\_CR1 GLTDLLNAKIKYGKETSVTVAMDKYVKGFIKYISEKDSSKFHCPVVSLEWRK-  
Ssu ELTNLLNAKIRYKENCSTVAMDKFVKGFIKRCIEDKDTNQFFCPVVSLEMEKL  
Smu ELFSMFSDTYLYNNKEMYL TNIVSDYTKKVIKALNNDGKGVPEFRI-----  
Spy\_CRa ELFTLFSDTFSYNGKEMYL TNISDYTKKVVKALNNEGKGVPEFRI-----  
Sth\_CR3 ELFSIFSETYLYNGKEMYL SNIVSDYTKKVIKALNQLGEEIPEFRI-----  
Sag ELFSMFSETYSYNGKEMYL SNIVSDYTKKVIKSLNSDNGIPEFRI-----  
Lin -----  
Sth\_CR2 SRILEVHRYIELDKKRYSFLYTADRQIKSLIRAFRELDPSLYETSYTGGH-----  
Ssa -----  
Mtu NRIARTATYIKGDPHRYTFQYALDLQLQSLVRVIEAGHPSRLVDIDITSEPSGA-  
Mbo NRIARTATYIKGDPHRYTFQYALDLQLQSLVRVIEAGHPSRLVDIDITSEPSGA-  
Sep LLLNVLYERCIIDKKVRLLDVSVKIVIQSLIRCYEENTPTYLLLPKMIEVGN---  
Spy\_CRb GRAIFIDLWQKRKHTEVEHPFTKEKVKMLLLPYVQAQLLAKAIRGDLESYPPFMV
