# Supplementary material
Source: PubMed Central journal article supplement (PMC2238196)
Supplement: jbacter_190_4_1401__2.pdf [file jbacter_190_4_1401__2.pdf]

**Table S1. Distribution of *S. thermophilus*-like CRISPR loci in prokaryotes.**

| Locus   | Organism                           | Strain              | Accession number | BLAST score* |
|---------|------------------------------------|---------------------|------------------|--------------|
| CRISPR1 | <i>Streptococcus gordonii</i>      | Challis substr. CH1 | CP000725         | 0.0          |
|         | <i>Actinobacillus succinogenes</i> | 130Z                | CP000746         | 4e-127       |
|         | <i>Neisseria meningitidis</i>      | Z2491 (serogroup A) | AL157959         | 6e-121       |
|         | <i>Pasteurella multocida</i>       | Pm70                | AE006153         | 7e-105       |
| CRISPR2 | <i>Mycobacterium tuberculosis</i>  | F11                 | CP000717         | 0.0          |
|         | <i>Mycobacterium bovis</i>         | BCG Pasteur 1173P2  | AM408590         | 0.0          |
|         | <i>Mycobacterium tuberculosis</i>  | CDC1551             | AE000516         | 0.0          |
|         | <i>Mycobacterium bovis</i>         | AF2122/97           | BX248343         | 0.0          |
|         | <i>Mycobacterium tuberculosis</i>  | H37Ra               | CP000611         | 0.0          |
|         | <i>Mycobacterium tuberculosis</i>  | H37Rv               | BX842581         | 0.0          |
|         | <i>Mycobacterium tuberculosis</i>  | y414a               | AD000007         | 0.0          |
|         | <i>Streptococcus sanguinis</i>     | SK36                | CP000387         | 0.0          |
|         | <i>Staphylococcus epidermidis</i>  | RP62A               | CP000029         | 0.0          |
|         | <i>Syntrophomonas wolfei</i>       | Goettingen          | CP000448         | 3e-118       |
|         | <i>Kuenenia stuttgartiensis</i>    | KUST_E              | CT573071         | 2e-71        |
|         | <i>Thermotoga maritima</i>         | MSB8                | AE000512         | 2e-62        |
|         | <i>Thermotoga petrophila</i>       | RKU-1               | CP000702         | 3e-61        |
|         | <i>Mycobacterium tuberculosis</i>  | 16319               | AF189762         | 8e-60        |
|         | <i>Mycobacterium tuberculosis</i>  | 9402008             | AF189821         | 1e-59        |
|         | <i>Mycobacterium tuberculosis</i>  | TN4937              | AF189819         | 1e-59        |
| CRISPR3 | <i>Streptococcus mutans</i>        | UA159               | AE014133         | 0.0          |
|         | <i>Streptococcus agalactiae</i>    | A909                | CP000114         | 0.0          |
|         | <i>Streptococcus agalactiae</i>    | 2603V/R             | AE014232         | 0.0          |
|         | <i>Streptococcus agalactiae</i>    | NEM316              | AL766847         | 0.0          |
|         | <i>Streptococcus pyogenes</i>      | MGAS10750           | CP000262         | 0.0          |
|         | <i>Streptococcus pyogenes</i>      | MGAS5005            | CP000017         | 0.0          |
|         | <i>Streptococcus pyogenes</i>      | M1 GAS              | AE004092         | 0.0          |
|         | <i>Streptococcus pyogenes</i>      | MGAS10270           | CP000260         | 0.0          |
|         | <i>Streptococcus pyogenes</i>      | MGAS315             | AE014074         | 0.0          |
|         | <i>Streptococcus pyogenes</i>      | SSI-1               | BA000034         | 0.0          |
|         | <i>Streptococcus pyogenes</i>      | MGAS6180            | CP000056         | 0.0          |
|         | <i>Streptococcus pyogenes</i>      | MGAS2096            | CP000261         | 0.0          |
|         | <i>Streptococcus pyogenes</i>      | MGAS9429            | CP000259         | 0.0          |
|         | <i>Listeria innocua</i>            | Clip11262           | AL596173         | 0.0          |
|         | <i>Lactobacillus salivarius</i>    | UCC118              | CP000233         | 7e-157       |
|         | <i>Treponema denticola</i>         | ATCC 35405          | AE017226         | 2e-140       |

\*tblastn score obtained with *S. thermophilus* concatenated Cas protein sequences (Fig. S1).
