# Supplementary material
Source: PubMed Central journal article supplement (PMC2238196)
Supplement: jbacter_190_4_1401__3.pdf [file jbacter_190_4_1401__3.pdf]

Table S2. *S. thermophilus* CRISPR sequence analysis.

| spacer identification (strain reference in Fig. 5, CRISPR locus, and spacer position from the leader end) | spacer sequence                        | spacer length | subject accession number | subject definition                                           | bit score | % identity | alignment length | in matches | gap opens | query start | subject start | subject end | BLAST hit with <i>S. thermophilus</i> phages | BLAST hit with other viruses | BLAST hit with <i>S. thermophilus</i> plasmids | BLAST hit with other plasmids | BLAST hit with <i>S. thermophilus</i> chromosomal sequence | BLAST hit with other chromosomal sequences | No significant BLAST hit (bit score below 40.1) |  |
|-----------------------------------------------------------------------------------------------------------|----------------------------------------|---------------|--------------------------|--------------------------------------------------------------|-----------|------------|------------------|------------|-----------|-------------|---------------|-------------|----------------------------------------------|------------------------------|------------------------------------------------|-------------------------------|------------------------------------------------------------|--------------------------------------------|-------------------------------------------------|--|
| 001_1_03                                                                                                  | TGTTTGCAGCAAACTCAAGATTCGAATTTG         | 30            | AF115103                 | <i>Streptococcus thermophilus</i> bacteriophage Sf21, comp   | 48        | 96         | 28               | 2          | 0         | 3           | 30            | 3634        | 38331                                        |                              |                                                |                               |                                                            |                                            |                                                 |  |
| 001_1_02                                                                                                  | AATGACGAGGAGCTATGGCACAAGTTACA          | 30            |                          |                                                              | 32        | 100        | 16               | 0          | 0         | 1           | 18            | 910896      | 910911                                       |                              |                                                |                               |                                                            |                                            |                                                 |  |
| 001_1_03                                                                                                  | CGATTTGCAACATCGTGGACACTGTIATC          | 30            |                          |                                                              | 32        | 100        | 16               | 0          | 0         | 8           | 23            | 7418        | 7433                                         |                              |                                                |                               |                                                            |                                            |                                                 |  |
| 001_1_04                                                                                                  | ACACTTGGCAGCGCTTATCTCAACAGCGCA         | 30            |                          |                                                              | 30        | 100        | 15               | 0          | 0         | 3           | 17            | 5650        | 5664                                         |                              |                                                |                               |                                                            |                                            |                                                 |  |
| 001_1_05                                                                                                  | CTGTTCCCTTGTCTTTTGTGTATCTTTTC          | 30            |                          |                                                              | 34        | 100        | 17               | 0          | 0         | 13          | 29            | 104947      | 104931                                       |                              |                                                |                               |                                                            |                                            |                                                 |  |
| 001_1_06                                                                                                  | TTCACTTCCGTTTTTGTGGCAATCCT             | 30            |                          |                                                              | 38        | 96         | 23               | 1          | 0         | 1           | 23            | 2214        | 2236                                         |                              |                                                |                               |                                                            |                                            |                                                 |  |
| 001_1_07                                                                                                  | GCTGGCAGGAAAGCAAGCAAGGCTCAACA          | 30            |                          |                                                              | 38        | 93         | 27               | 2          | 0         | 4           | 30            | 1003        | 1029                                         |                              |                                                |                               |                                                            |                                            |                                                 |  |
| 001_1_08                                                                                                  | CATAGATGGAAAACATGAAAACAGATTCAA         | 30            | AF085222                 | <i>Streptococcus thermophilus</i> bacteriophage DT1, compl   | 46        | 100        | 23               | 0          | 0         | 8           | 30            | 24339       | 24361                                        | 1                            |                                                |                               |                                                            |                                            |                                                 |  |
| 001_1_09                                                                                                  | ATAATGCCGTTGAATACACGGCAAGGTC           | 30            |                          |                                                              | 28        | 100        | 14               | 0          | 0         | 1           | 14            | 1148        | 1135                                         |                              |                                                |                               |                                                            |                                            |                                                 |  |
| 001_1_10                                                                                                  | GAGCGAGCTCGAAATATCTTAATACAAG           | 30            | U88974                   | <i>Streptococcus thermophilus</i> temperate bacteriophage C  | 46        | 100        | 23               | 0          | 0         | 4           | 26            | 23003       | 23025                                        | 1                            |                                                |                               |                                                            |                                            |                                                 |  |
| 001_1_11                                                                                                  | GTTCCGTAGCGTCATGGTGAACGATTTA           | 30            |                          |                                                              | 30        | 100        | 15               | 0          | 0         | 10          | 24            | 912         | 898                                          |                              |                                                |                               |                                                            |                                            |                                                 |  |
| 001_1_12                                                                                                  | GGCGTCCCAATCCCTGATTAATCTAGCTCG         | 30            | AF085222                 | <i>Streptococcus thermophilus</i> bacteriophage DT1, compl   | 54        | 100        | 27               | 0          | 0         | 1           | 27            | 21704       | 21678                                        | 1                            |                                                |                               |                                                            |                                            |                                                 |  |
| 001_1_13                                                                                                  | AACACAGCAAGCAAGGATGATGCTGATG           | 30            |                          |                                                              | 34        | 100        | 17               | 0          | 0         | 11          | 27            | 19872       | 19888                                        |                              |                                                |                               |                                                            |                                            |                                                 |  |
| 001_1_14                                                                                                  | CGACACAAAAGCATGCAAGAGTTGCAAG           | 29            | AY196178                 | <i>Streptococcus thermophilus</i> bacteriophage kappa3 puta  | 58        | 100        | 29               | 0          | 0         | 1           | 29            | 1172        | 1200                                         | 1                            |                                                |                               |                                                            |                                            |                                                 |  |
| 001_1_15                                                                                                  | ACAATTCCTTCATCCGGTAACTGGTCAAGT         | 30            |                          |                                                              | 34        | 100        | 17               | 0          | 0         | 1           | 17            | 6135        | 6151                                         |                              |                                                |                               |                                                            |                                            |                                                 |  |
| 001_1_16                                                                                                  | AATTAAAGGCATAGAAAGGAGCAACATG           | 30            |                          |                                                              | 30        | 100        | 15               | 0          | 0         | 12          | 26            | 5814        | 5800                                         |                              |                                                |                               |                                                            |                                            |                                                 |  |
| 001_1_17                                                                                                  | CGATTTTAAATCAATTTTCAATCTCAT            | 30            |                          |                                                              | 38        | 100        | 19               | 0          | 0         | 3           | 21            | 1512        | 1530                                         |                              |                                                |                               |                                                            |                                            |                                                 |  |
| 001_1_18                                                                                                  | CGAGTATCAGCAAGCAAGCTGTATTACT           | 30            | AF115103                 | <i>Streptococcus thermophilus</i> bacteriophage Sf21, comp   | 52        | 97         | 30               | 1          | 0         | 1           | 30            | 5038        | 5038                                         | 1                            |                                                |                               |                                                            |                                            |                                                 |  |
| 001_1_19                                                                                                  | ATAAAGTATAAATTTTAAATTTTAAAGA           | 30            | AF145054                 | <i>Streptococcus thermophilus</i> bacteriophage 7201, comp   | 60        | 100        | 30               | 0          | 0         | 1           | 30            | 5338        | 5367                                         | 1                            |                                                |                               |                                                            |                                            |                                                 |  |
| 001_1_20                                                                                                  | AATAATTTATGGTATAGCTTAATATCAITG         | 30            |                          |                                                              | 32        | 100        | 16               | 0          | 0         | 14          | 29            | 4529        | 4514                                         |                              |                                                |                               |                                                            |                                            |                                                 |  |
| 001_1_21                                                                                                  | TGCATCGAGCAGCTGTCAGTTTACCGTTTC         | 30            | AY699705                 | <i>Streptococcus thermophilus</i> bacteriophage 2972, comp   | 42        | 93         | 29               | 2          | 0         | 2           | 30            | 16682       | 16710                                        | 1                            |                                                |                               |                                                            |                                            |                                                 |  |
| 001_1_22                                                                                                  | TCTATTCGAGTCAACTCAAAATTTATGCT          | 30            | AF115103                 | <i>Streptococcus thermophilus</i> bacteriophage Sf21, comp   | 42        | 96         | 25               | 1          | 0         | 4           | 28            | 20428       | 20452                                        | 1                            |                                                |                               |                                                            |                                            |                                                 |  |
| 001_1_23                                                                                                  | AATCGTTCAAATCTGTTTAAAGTACATTT          | 30            |                          |                                                              | 34        | 100        | 17               | 0          | 0         | 12          | 28            | 386376      | 386392                                       |                              |                                                |                               |                                                            |                                            |                                                 |  |
| 001_1_24                                                                                                  | AATCAATACAGCAAGGATTAAGTGGCTTC          | 30            | AF020798                 | <i>Streptococcus thermophilus</i> bacteriophage lysogeny mc  | 52        | 97         | 30               | 1          | 0         | 1           | 30            | 2162        | 2191                                         | 1                            |                                                |                               |                                                            |                                            |                                                 |  |
| 001_1_25                                                                                                  | GCTTAGCTGCCAATCCACCAAGCTGGATG          | 30            | AF145054                 | <i>Streptococcus thermophilus</i> bacteriophage 7201, comp   | 60        | 100        | 30               | 0          | 0         | 1           | 30            | 17818       | 17847                                        | 1                            |                                                |                               |                                                            |                                            |                                                 |  |
| 001_1_26                                                                                                  | CAACCAACGGTAAACAGCTACTTTTACAAT         | 30            |                          |                                                              | 30        | 95         | 19               | 1          | 0         | 6           | 24            | 1654290     | 1654308                                      |                              |                                                |                               |                                                            |                                            |                                                 |  |
| 001_1_27                                                                                                  | ATACTGAAGGATAGGAGCTGTAAGATCT           | 30            |                          |                                                              | 30        | 100        | 15               | 0          | 0         | 10          | 24            | 60138       | 60124                                        |                              |                                                |                               |                                                            |                                            |                                                 |  |
| 001_1_28                                                                                                  | TAATGCTACATCTCAAAGGATGATCCGACA         | 30            | AF115103                 | <i>Streptococcus thermophilus</i> bacteriophage Sf21, comp   | 58        | 100        | 29               | 0          | 0         | 2           | 30            | 19154       | 19182                                        | 1                            |                                                |                               |                                                            |                                            |                                                 |  |
| 001_1_29                                                                                                  | AAGTAGTGTAGCTACATCAATGGTTTAT           | 30            | AJ239049                 | <i>Streptococcus thermophilus</i> partial repA gene, ORF1 to | 60        | 100        | 30               | 0          | 0         | 1           | 30            | 1735        | 1764                                         |                              |                                                |                               |                                                            |                                            |                                                 |  |
| 001_1_30                                                                                                  | ACCTAGAAGCAATGGCGTATATGATTTG           | 30            |                          |                                                              | 30        | 95         | 19               | 1          | 0         | 9           | 27            | 1847        | 1865                                         |                              |                                                |                               |                                                            |                                            |                                                 |  |
| 001_1_31                                                                                                  | AATTTGCCCTTCTTGGCCCTTGGATAG            | 30            |                          |                                                              | 36        | 95         | 22               | 1          | 0         | 3           | 24            | 38780       | 38759                                        |                              |                                                |                               |                                                            |                                            |                                                 |  |
| 001_1_32                                                                                                  | ACCATAGCAATCATTTGGCCCTTGGATG           | 30            | AF115103                 | <i>Streptococcus thermophilus</i> bacteriophage Sf21, comp   | 44        | 93         | 30               | 2          | 0         | 1           | 30            | 9553        | 9524                                         | 1                            |                                                |                               |                                                            |                                            |                                                 |  |
| 001_2_01                                                                                                  | GCTTTCTAGCTCGCTTAATACCCCTTCCAGAAA      | 36            |                          |                                                              | 32        | 100        | 16               | 0          | 0         | 11          | 26            | 1127525     | 1127540                                      |                              |                                                |                               |                                                            |                                            |                                                 |  |
| 001_2_02                                                                                                  | TCAAAATATGTTTACCTGTATTTTCAATTA         | 40            |                          |                                                              | 33        | 93         | 27               | 1          | 0         | 11          | 33            | 15681       | 15639                                        |                              |                                                |                               |                                                            |                                            |                                                 |  |
| 001_2_03                                                                                                  | CCACTGCTGTGTACGATCTCCAGCACTCCGCTATGATG | 40            | AF085222                 | <i>Streptococcus thermophilus</i> bacteriophage DT1, compl   | 66        | 97         | 37               | 1          | 0         | 1           | 37            | 23672       | 23636                                        | 1                            |                                                |                               |                                                            |                                            |                                                 |  |
| 001_3_01                                                                                                  | AAATTCCTAAACCGTAAAGAGGAGGAGCA          | 30            | AF145054                 | <i>Streptococcus thermophilus</i> bacteriophage 7201, comp   | 60        | 100        | 30               | 0          | 0         | 1           | 30            | 19620       | 19649                                        | 1                            |                                                |                               |                                                            |                                            |                                                 |  |
| 001_3_02                                                                                                  | TACTGCTGTATTAGCTGTGGTTGGTTTGG          | 30            | AF158600                 | <i>Streptococcus thermophilus</i> bacteriophage Sf11, comp   | 44        | 93         | 30               | 2          | 0         | 1           | 30            | 26400       | 26371                                        | 1                            |                                                |                               |                                                            |                                            |                                                 |  |
| 001_3_03                                                                                                  | TTCCCTTGTAAACATTTTAAATAATGT            | 30            | AF410153                 | Swinepox virus isolate 17077-99, complete genome             | 44        | 100        | 22               | 0          | 0         | 9           | 30            | 71691       | 71712                                        |                              |                                                |                               |                                                            |                                            |                                                 |  |
| 001_3_04                                                                                                  | TATCCAGAGAAATGAAGAAACAATATAGA          | 30            |                          |                                                              | 36        | 100        | 18               | 0          | 0         | 10          | 27            | 917945      | 917928                                       |                              |                                                |                               |                                                            |                                            |                                                 |  |
| 001_3_05                                                                                                  | TATGAATGTCAAATTAACGGTTGCGGTAA          | 30            |                          |                                                              | 34        | 95         | 21               | 1          | 0         | 3           | 23            | 966         | 986                                          |                              |                                                |                               |                                                            |                                            |                                                 |  |
| 001_3_06                                                                                                  | CGATGAAATGATGGCTTCCAGGTAAGGA           | 30            |                          |                                                              | 34        | 100        | 17               | 0          | 0         | 9           | 25            | 5597395     | 5597379                                      |                              |                                                |                               |                                                            |                                            |                                                 |  |
| 001_3_07                                                                                                  | AATGGGAAAGTACGTATATATGATCCAGAG         | 30            | AY196178                 | <i>Streptococcus thermophilus</i> bacteriophage kappa3 puta  | 60        | 100        | 30               | 0          | 0         | 1           | 30            | 229         | 258                                          | 1                            |                                                |                               |                                                            |                                            |                                                 |  |
| 001_3_08                                                                                                  | GAAAGCAAGAAAGTGAAGGATGAGCGGC           | 30            | AF115102                 | <i>Streptococcus thermophilus</i> bacteriophage Sf19, comp   | 42        | 93         | 29               | 2          | 0         | 1           | 29            | 10073       | 10101                                        | 1                            |                                                |                               |                                                            |                                            |                                                 |  |
| 001_3_09                                                                                                  | AATTTAAACAGATATAGTGAATCGGTATT          | 30            |                          |                                                              | 34        | 100        | 17               | 0          | 0         | 1           | 17            | 723004      | 723020                                       |                              |                                                |                               |                                                            |                                            |                                                 |  |
| 001_3_10                                                                                                  | CTATTACTATCTCCGAAGGATTTGGACA           | 30            | AF115103                 | <i>Streptococcus thermophilus</i> bacteriophage Sf21, comp   | 44        | 96         | 26               | 1          | 0         | 1           | 26            | 24303       | 24328                                        | 1                            |                                                |                               |                                                            |                                            |                                                 |  |
| 002_1_01                                                                                                  | TTACGTTTGAAGAAATTCACAACTAATGA          | 30            | AY699705                 | <i>Streptococcus thermophilus</i> bacteriophage 2972, comp   | 60        | 100        | 30               | 0          | 0         | 1           | 30            | 17202       | 17231                                        | 1                            |                                                |                               |                                                            |                                            |                                                 |  |
| 003_1_01                                                                                                  | CTCAGCTGTTACTGGTGAACCATGTTCCAA         | 30            | AY196178                 | <i>Streptococcus thermophilus</i> bacteriophage kappa3 puta  | 60        | 100        | 30               | 0          | 0         | 1           | 30            | 885         | 914                                          | 1                            |                                                |                               |                                                            |                                            |                                                 |  |
| 004_1_01                                                                                                  | TCCAAGTATTITGAGGAGTATTAAAGACAT         | 30            | AY699705                 | <i>Streptococcus thermophilus</i> bacteriophage 2972, comp   | 60        | 100        | 30               | 0          | 0         | 1           | 30            | 33968       | 33997                                        | 1                            |                                                |                               |                                                            |                                            |                                                 |  |
| 005_1_01                                                                                                  | ATTGTCTATTAGCAGCACTGGAAGTATGAT         | 30            | AY699705                 | <i>Streptococcus thermophilus</i> bacteriophage 2972, comp   | 60        | 100        | 30               | 0          | 0         | 1           | 30            | 33044       | 33073                                        | 1                            |                                                |                               |                                                            |                                            |                                                 |  |
| 006_1_01                                                                                                  | CTTCAAATGACTGCAAGGCTGCAAAAGTA          | 30            |                          |                                                              | 54        | 95         | 21               | 1          | 0         | 1           | 21            | 377         | 357                                          |                              |                                                |                               |                                                            |                                            |                                                 |  |
| 007_1_01                                                                                                  | AGTTCTTGTCCAGCACTGCAACCCCGC            | 30            | AY699705                 | <i>Streptococcus thermophilus</i> bacteriophage 2972, comp   | 60        | 100        | 30               | 0          | 0         | 1           | 30            | 22075       | 22044                                        | 1                            |                                                |                               |                                                            |                                            |                                                 |  |
| 008_1_01                                                                                                  | CGCCTTCTAATTTGSAATTTACCTTCCGAGS        | 30            | AY699705                 | <i>Streptococcus thermophilus</i> bacteriophage 2972, comp   | 60        | 100        | 30               | 0          | 0         | 1           | 30            | 34521       | 34492                                        | 1                            |                                                |                               |                                                            |                                            |                                                 |  |
| 009_1_01                                                                                                  | TTATATCGAAGAACGACTGAAAAGCGTTGA         | 30            | AY699705                 | <i>Streptococcus thermophilus</i> bacteriophage 2972, comp   | 60        | 100        | 30               | 0          | 0         | 1           | 30            | 1113        | 1142                                         | 1                            |                                                |                               |                                                            |                                            |                                                 |  |
| 010_1_01                                                                                                  | TGAAGTATTAGTCTCAAAGATGATAT             | 31            | AY699705                 | <i>Streptococcus thermophilus</i> bacteriophage 2972, comp   | 62        | 100        | 31               | 0          | 0         | 1           | 31            | 26529       | 26559                                        | 1                            |                                                |                               |                                                            |                                            |                                                 |  |
| 011_1_01                                                                                                  | AGTTGATGGCTAATCAACCATGCCATAA           | 30            | AY699705                 | <i>Streptococcus thermophilus</i> bacteriophage 2972, comp   | 60        | 100        | 30               | 0          | 0         | 1           | 30            | 29923       | 29894                                        | 1                            |                                                |                               |                                                            |                                            |                                                 |  |
| 012_1_01                                                                                                  | AAATCAACGTACATCCGATATGAGCCAGCA         | 30            | AY699705                 | <i>Streptococcus thermophilus</i> bacteriophage 2972, comp   | 60        | 100        | 30               | 0          | 0         | 1           | 30            | 19188       | 19159                                        | 1                            |                                                |                               |                                                            |                                            |                                                 |  |
| 013_1_02                                                                                                  | GACATATCGACGATCGTGATTTCCCAAT           | 30            | AY699705                 | <i>Streptococcus thermophilus</i> bacteriophage 2972, comp   | 60        | 100        | 30               | 0          | 0         | 1           | 30            | 31708       | 31737                                        | 1                            |                                                |                               |                                                            |                                            |                                                 |  |
| 012_1_01                                                                                                  | GCAACACTCAAAGTGCAGCAAGCAAGCTT          | 30            | AY699705                 | <i>Streptococcus thermophilus</i> bacteriophage 2972, comp   | 60        | 100        | 30               | 0          | 0         | 1           | 30            | 441         | 470                                          | 1                            |                                                |                               |                                                            |                                            |                                                 |  |
| 013_1_02                                                                                                  | CTCAGCTGTTACTGGTGAACCATGTTCCAA         | 31            | AY196178                 | <i>Streptococcus thermophilus</i> bacteriophage kappa3 puta  | 50        | 100        | 25               | 0          | 0         | 1           | 25            | 885         | 909                                          | 1                            |                                                |                               |                                                            |                                            |                                                 |  |
| 014_1_01                                                                                                  | TTTTCATCGCAATTTCCATGTTTAAATCT          | 30            | AY699705                 | <i>Streptococcus thermophilus</i> bacteriophage 2972, comp   | 60        | 100        | 30               | 0          | 0         | 1           | 30            | 27032       | 27003                                        | 1                            |                                                |                               |                                                            |                                            |                                                 |  |
| 015_1_01                                                                                                  | GAAATATTAGTCTCTCAACAGATGATTT           | 30            | AY699705                 | <i>Streptococcus thermophilus</i> bacteriophage 2972, comp   | 52        | 97         | 30               | 1          | 0         | 1           | 30            | 26530       | 26559                                        | 1                            |                                                |                               |                                                            |                                            |                                                 |  |
| 016_1_01                                                                                                  | ATTGGCATGATTTCAATTTAATTTGGGAT          | 29            | AY699705                 | <i>Streptococcus thermophilus</i> bacteriophage 2972, comp   | 58        | 100        | 29               | 0          | 0         | 1           | 29            | 32136       | 32164                                        | 1                            |                                                |                               |                                                            |                                            |                                                 |  |
| 018_1_01                                                                                                  | TACGAAAGCACTGGTTGAAAATTTCAAG           | 30            | AY196178                 | <i>Streptococcus thermophilus</i> bacteriophage kappa3 puta  | 60        | 100        | 30               | 0          | 0         | 1           | 30            | 106         | 135                                          | 1                            |                                                |                               |                                                            |                                            |                                                 |  |
| 019_1_01                                                                                                  | AAGCAAGTGTATATTTCTTCTTCTTAT            | 30            | AY699705                 | <i>Streptococcus thermophilus</i> bacteriophage 2972, comp   | 60        | 100        | 30               | 0          |           |             |               |             |                                              |                              |                                                |                               |                                                            |                                            |                                                 |  |

| spacer identification (strain reference in Fig. 5, CRISPR locus, and spacer position from the leader end) | spacer sequence                | spacer length | subject accession number | subject definition                                     | bit score | % identity | alignment length | mismatches | gap opens | query start | query end | subject start | subject end | BLAST hit with S. thermophilus phages | BLAST hit with other viruses | BLAST hit with S. thermophilus plasmids | BLAST hit with other plasmids | BLAST hit with S. thermophilus chromosomal sequence | BLAST hit with other chromosomal sequences | No significant BLAST hit (bit score below 40.1) |
|-----------------------------------------------------------------------------------------------------------|--------------------------------|---------------|--------------------------|--------------------------------------------------------|-----------|------------|------------------|------------|-----------|-------------|-----------|---------------|-------------|---------------------------------------|------------------------------|-----------------------------------------|-------------------------------|-----------------------------------------------------|--------------------------------------------|-------------------------------------------------|
| 033_3_01                                                                                                  | AACACTTGGTCCATTAAGTCTCCTCAGAG  | 30            |                          |                                                        | 34        | 100        | 17               | 0          | 0         | 7           | 23        | 652077        | 652061      |                                       |                              |                                         |                               |                                                     |                                            |                                                 |
| 033_3_02                                                                                                  | AGATACGTCAGTTGTGTTAGTCTTGCTAC  | 30            | AJ242479                 | Streptococcus thermophilus res gene, ORF2 and ORF3     | 60        | 100        | 30               | 0          | 1         | 30          | 4077      | 4106          |             |                                       |                              | 1                                       |                               |                                                     |                                            |                                                 |
| 033_3_03                                                                                                  | ATTCCGGTACCTGAATATACTAGTCTGTA  | 30            |                          |                                                        | 34        | 100        | 17               | 0          | 0         | 1           | 17        | 1700352       | 1700336     |                                       |                              |                                         |                               |                                                     |                                            | 1                                               |
| 033_3_04                                                                                                  | AAACCGTTCGCAATTAACAAGAGTGGCGAA | 30            |                          |                                                        | 34        | 100        | 17               | 0          | 0         | 4           | 20        | 1568391       | 1568375     |                                       |                              |                                         |                               |                                                     |                                            | 1                                               |
| 033_3_05                                                                                                  | TATTAAGGTCGCAAGAGGCTTCAACCTGA  | 30            | AF145054                 | Streptococcus thermophilus bacteriophage 7201, comp    | 44        | 93         | 30               | 2          | 1         | 30          | 1808      | 18537         |             | 1                                     |                              |                                         |                               |                                                     |                                            |                                                 |
| 033_3_06                                                                                                  | TATCTCTGAAGGTAAAGCTGAAGAAATAA  | 30            |                          |                                                        | 38        | 100        | 19               | 0          | 0         | 6           | 24        | 41651         | 41633       |                                       |                              |                                         |                               |                                                     |                                            | 1                                               |
| 033_3_07                                                                                                  | CAACCCAGACATGAATGCTCACTAGATATG | 30            |                          |                                                        | 38        | 100        | 19               | 0          | 0         | 2           | 20        | 21347         | 21363       |                                       |                              |                                         |                               |                                                     |                                            | 1                                               |
| 033_3_08                                                                                                  | ACGGTCTGTATGAAAAGACCACTTGGCT   | 30            | AJ242477                 | Streptococcus thermophilus repA gene for putative sma  | 52        | 97         | 30               | 1          | 0         | 1           | 30        | 2464          | 2493        |                                       |                              |                                         | 1                             |                                                     |                                            |                                                 |
| 033_3_09                                                                                                  | CATGTAACCTTGAATATCAACGACAGATAG | 31            |                          |                                                        | 32        | 100        | 16               | 0          | 0         | 13          | 28        | 101063        | 101048      |                                       |                              |                                         |                               |                                                     |                                            | 1                                               |
| 033_3_10                                                                                                  | GAACCTTTCAGCTTAAACAGCGCTTAGAAC | 31            |                          |                                                        | 34        | 95         | 21               | 1          | 0         | 6           | 28        | 493627        | 493607      |                                       |                              |                                         |                               |                                                     |                                            | 1                                               |
| 033_3_11                                                                                                  | ATGACCTATTCAAGATATGGTCACTAA    | 30            | AF145054                 | Streptococcus thermophilus bacteriophage 7201, comp    | 44        | 93         | 30               | 2          | 0         | 1           | 30        | 34287         | 34316       |                                       |                              |                                         |                               |                                                     |                                            | 1                                               |
| 033_3_12                                                                                                  | TCTTAAAXATTAATTAACGCAAGTACAT   | 30            | AF158601                 | Streptococcus thermophilus bacteriophage Sfi18 lysin   | 46        | 96         | 27               | 1          | 0         | 4           | 30        | 4156          | 4182        |                                       |                              |                                         |                               |                                                     |                                            | 1                                               |
| 033_3_13                                                                                                  | TAAACAGCTGACAGCTGTACTATCAGCC   | 30            |                          |                                                        | 36        | 100        | 18               | 0          | 0         | 4           | 21        | 2021331       | 2021314     |                                       |                              |                                         |                               |                                                     |                                            | 1                                               |
| 033_3_14                                                                                                  | GGGTGCTGATATGCTACTCTGGTGCGAC   | 30            | AF145054                 | Streptococcus thermophilus bacteriophage 7201, comp    | 44        | 93         | 30               | 2          | 0         | 1           | 30        | 34503         | 34532       |                                       |                              |                                         |                               |                                                     |                                            | 1                                               |
| 034_1_01                                                                                                  | AGATACTCGCTCATATGCTCAACCGTGGT  | 29            | AF115103                 | Streptococcus thermophilus bacteriophage Sfi21, comp   | 46        | 100        | 23               | 0          | 0         | 4           | 26        | 38729         | 38707       |                                       |                              |                                         |                               |                                                     |                                            | 1                                               |
| 034_1_02                                                                                                  | ATGTTTAAAGAGCGCTTCAAGTATGTCAC  | 30            | AF145054                 | Streptococcus thermophilus bacteriophage 7201, comp    | 52        | 97         | 30               | 1          | 0         | 1           | 30        | 9172          | 9201        |                                       |                              |                                         |                               |                                                     |                                            | 1                                               |
| 034_1_03                                                                                                  | ATCAGATAAAAAGGTGGATATGCTACCA   | 30            | AF145054                 | Streptococcus thermophilus bacteriophage 7201, comp    | 52        | 100        | 26               | 0          | 0         | 5           | 30        | 18734         | 18759       |                                       |                              |                                         |                               |                                                     |                                            | 1                                               |
| 034_1_04                                                                                                  | GGCAATATTACCCGTTTGGATGATGATAT  | 30            |                          |                                                        | 34        | 95         | 21               | 1          | 0         | 7           | 27        | 502533        | 502553      |                                       |                              |                                         |                               |                                                     |                                            | 1                                               |
| 034_1_05                                                                                                  | GTGGTCTTCTATTCGTAAGATGACACTAGA | 30            | AF085222                 | Streptococcus thermophilus bacteriophage DT1, comple   | 44        | 93         | 30               | 2          | 0         | 1           | 30        | 34403         | 34432       |                                       |                              |                                         |                               |                                                     |                                            | 1                                               |
| 034_1_06                                                                                                  | ATTAGATGCTATTATCACCAGTGCAAAAT  | 30            |                          |                                                        | 34        | 100        | 17               | 0          | 0         | 14          | 30        | 339536        | 339552      |                                       |                              |                                         |                               |                                                     |                                            | 1                                               |
| 034_1_07                                                                                                  | CAAAAACGCTTGGGTGACTCACTAATGGA  | 30            | AF115102                 | Streptococcus thermophilus bacteriophage Sfi19, comp   | 52        | 97         | 30               | 1          | 0         | 1           | 30        | 6849          | 6878        |                                       |                              |                                         |                               |                                                     |                                            | 1                                               |
| 034_1_08                                                                                                  | ATTTTTGACATTTGACTTAAAGATGTGGAG | 31            | CP000421                 | Streptococcus thermophilus LMD-9 plasmid 2, complete   | 54        | 97         | 31               | 0          | 0         | 1           | 31        | 2535          | 2565        |                                       |                              |                                         | 1                             |                                                     |                                            |                                                 |
| 034_1_09                                                                                                  | CGAATCAGTAGTATGATTTGGCCGTTTTA  | 30            | CP000323                 | Psychrobacter cryohalotolerans K5, complete genome     | 40        | 100        | 20               | 0          | 0         | 11          | 30        | 1603941       | 1603922     |                                       |                              |                                         |                               |                                                     |                                            | 1                                               |
| 034_1_10                                                                                                  | CACATACGTTACTATCGGGGCGACAACA   | 30            |                          |                                                        | 32        | 100        | 16               | 0          | 0         | 1           | 16        | 18219         | 18204       |                                       |                              |                                         |                               |                                                     |                                            | 1                                               |
| 034_1_11                                                                                                  | CAAGAATGGGCATAAACGACATGACCCA   | 29            | AF145054                 | Streptococcus thermophilus bacteriophage 7201, comp    | 58        | 100        | 29               | 0          | 0         | 1           | 29        | 20961         | 20989       |                                       |                              |                                         |                               |                                                     |                                            | 1                                               |
| 034_1_12                                                                                                  | CTGTGCTGTTTCGACCCGCAACGTTATCAA | 31            | AF145054                 | Streptococcus thermophilus bacteriophage 7201, comp    | 60        | 100        | 30               | 0          | 0         | 2           | 31        | 1343          | 1372        |                                       |                              |                                         |                               |                                                     |                                            | 1                                               |
| 034_1_13                                                                                                  | CATTAAATGCAACCCGTTGATGCTGTGACA | 30            |                          |                                                        | 34        | 100        | 17               | 0          | 0         | 1           | 17        | 360569        | 360585      |                                       |                              |                                         |                               |                                                     |                                            | 1                                               |
| 034_1_14                                                                                                  | ATTAAATTCGCAAAATAGCCAAATTCGC   | 30            | AF085222                 | Streptococcus thermophilus bacteriophage DT1, comple   | 60        | 100        | 30               | 0          | 0         | 1           | 30        | 3037          | 3068        |                                       |                              |                                         |                               |                                                     |                                            | 1                                               |
| 034_1_15                                                                                                  | TTACAAGACAAAGAAACAAACCAACCCA   | 30            | CP000350                 | Leptospira borgpetersenii serovar Hardjo-bovis JB197 c | 44        | 96         | 26               | 1          | 0         | 5           | 30        | 1010698       | 1010723     |                                       |                              |                                         |                               |                                                     |                                            | 1                                               |
| 034_1_16                                                                                                  | TGGAACATGAAGATGAATAGAGTGGAA    | 30            | AY699705                 | Streptococcus thermophilus bacteriophage 2972, comp    | 44        | 93         | 30               | 2          | 0         | 1           | 30        | 34105         | 34134       |                                       |                              |                                         |                               |                                                     |                                            | 1                                               |
| 034_1_17                                                                                                  | AAATCTCGTAGTATGACAGTGGATTTTCAA | 30            | AF115102                 | Streptococcus thermophilus bacteriophage Sfi19, comp   | 60        | 100        | 30               | 0          | 0         | 1           | 30        | 1746          | 1717        |                                       |                              |                                         |                               |                                                     |                                            | 1                                               |
| 034_1_18                                                                                                  | TCATAGCGGATTCGCAACCCGCTAAGCC   | 29            | AF115103                 | Streptococcus thermophilus bacteriophage Sfi21, comp   | 46        | 96         | 27               | 1          | 0         | 3           | 29        | 39230         | 39204       |                                       |                              |                                         |                               |                                                     |                                            | 1                                               |
| 034_1_22                                                                                                  | AATTGGACGTGTCAAACGCAACAAAGTCA  | 30            | AF145054                 | Streptococcus thermophilus bacteriophage 7201, comp    | 40        | 100        | 20               | 0          | 0         | 3           | 22        | 804           | 823         |                                       |                              |                                         |                               |                                                     |                                            | 1                                               |
| 035_1_01                                                                                                  | CAGCACTAGCCGCAACCGCTTGTATATTA  | 30            | AF115102                 | Streptococcus thermophilus bacteriophage Sfi19, comp   | 40        | 96         | 24               | 1          | 0         | 1           | 24        | 5575          | 5552        |                                       |                              |                                         |                               |                                                     |                                            | 1                                               |
| 035_1_02                                                                                                  | TAGAATCAAGGAATCTGGATGAAGAATGA  | 30            |                          |                                                        | 34        | 100        | 17               | 0          | 0         | 2           | 18        | 348278        | 348294      |                                       |                              |                                         |                               |                                                     |                                            | 1                                               |
| 035_1_03                                                                                                  | ATATGAAGGAAATGATGAAGAATGA      | 30            |                          |                                                        | 38        | 100        | 19               | 0          | 0         | 10          | 28        | 11817         | 11835       |                                       |                              |                                         |                               |                                                     |                                            | 1                                               |
| 035_1_04                                                                                                  | TTTTGGGATCAACACGCACTGCTGACTTG  | 31            |                          |                                                        | 38        | 96         | 23               | 1          | 0         | 9           | 31        | 9890          | 9912        |                                       |                              |                                         |                               |                                                     |                                            | 1                                               |
| 035_1_05                                                                                                  | GTGGAGATGCCAATGTTTTCAATCCCTTG  | 30            | AY699705                 | Streptococcus thermophilus bacteriophage 2972, comp    | 60        | 100        | 30               | 0          | 0         | 1           | 30        | 15761         | 15732       |                                       |                              |                                         |                               |                                                     |                                            | 1                                               |
| 035_1_06                                                                                                  | GTATCAAAAGCGCATCATGAACGCGACT   | 30            |                          |                                                        | 36        | 95         | 22               | 1          | 0         | 8           | 29        | 1793935       | 1793914     |                                       |                              |                                         |                               |                                                     |                                            | 1                                               |
| 035_1_07                                                                                                  | AAAAACAATGAAATTCATATACGCGCTT   | 30            |                          |                                                        | 38        | 100        | 19               | 0          | 0         | 1           | 19        | 3352344       | 3352326     |                                       |                              |                                         |                               |                                                     |                                            | 1                                               |
| 035_1_08                                                                                                  | GCTTTTAACTGTTTTAAGAAATACCCCTC  | 29            | AF158600                 | Streptococcus thermophilus bacteriophage Sfi11, comp   | 42        | 93         | 29               | 2          | 0         | 1           | 29        | 28309         | 28337       |                                       |                              |                                         |                               |                                                     |                                            | 1                                               |
| 035_1_09                                                                                                  | GTGACGCTGCAATGACTTGCATAGTAAT   | 30            | AY196178                 | Streptococcus thermophilus bacteriophage kappa3 puta   | 52        | 97         | 30               | 1          | 0         | 1           | 30        | 652           | 623         |                                       |                              |                                         |                               |                                                     |                                            | 1                                               |
| 035_1_10                                                                                                  | ATACTGGTATATAGTAATCATACTTCATC  | 30            |                          |                                                        | 36        | 100        | 18               | 0          | 0         | 8           | 25        | 300114        | 300131      |                                       |                              |                                         |                               |                                                     |                                            | 1                                               |
| 035_1_11                                                                                                  | TTGGTGTTCATGAGTATGCTGTGCTGCA   | 30            |                          |                                                        | 38        | 100        | 19               | 0          | 0         | 5           | 23        | 1498          | 1479        |                                       |                              |                                         |                               |                                                     |                                            | 1                                               |
| 035_1_12                                                                                                  | CTGATTTGGCTTGTCTTTTGGCTCTTT    | 30            |                          |                                                        | 38        | 93         | 27               | 2          | 0         | 4           | 30        | 2590          | 12564       |                                       |                              |                                         |                               |                                                     |                                            | 1                                               |
| 035_1_13                                                                                                  | GCAGCACTGAGAACTTACGCTCCAGTGG   | 30            |                          |                                                        | 34        | 100        | 17               | 0          | 0         | 5           | 21        | 439582        | 439598      |                                       |                              |                                         |                               |                                                     |                                            | 1                                               |
| 035_1_14                                                                                                  | TGCTACTATGAGGACCGTGTGACTACTT   | 30            |                          |                                                        | 32        | 100        | 16               | 0          | 0         | 9           | 24        | 1956590       | 1956575     |                                       |                              |                                         |                               |                                                     |                                            | 1                                               |
| 035_1_15                                                                                                  | TCTTCTTAACTCTTTTTAAGTCAAGCTT   | 30            |                          |                                                        | 38        | 100        | 19               | 0          | 0         | 2           | 20        | 812942        | 812924      |                                       |                              |                                         |                               |                                                     |                                            | 1                                               |
| 035_1_16                                                                                                  | GTATCCATTAATATAGTACATTTCTATCA  | 30            | AF115103                 | Streptococcus thermophilus bacteriophage Sfi21, comp   | 54        | 100        | 27               | 0          | 0         | 4           | 30        | 22787         | 22761       |                                       |                              |                                         |                               |                                                     |                                            | 1                                               |
| 035_1_17                                                                                                  | AGTAGAGAACCCAGCACACTGACTACTAC  | 30            | AF145054                 | Streptococcus thermophilus bacteriophage 7201, comp    | 60        | 100        | 30               | 0          | 0         | 1           | 30        | 10734         | 10763       |                                       |                              |                                         |                               |                                                     |                                            | 1                                               |
| 035_1_18                                                                                                  | CTTCGACGAAAGTTTATAGCAACCTCGC   | 30            | AF115103                 | Streptococcus thermophilus bacteriophage Sfi21, comp   | 40        | 93         | 28               | 2          | 0         | 1           | 28        | 3575          | 3548        |                                       |                              |                                         |                               |                                                     |                                            | 1                                               |
| 035_1_19                                                                                                  | TGATAGAGCTAGAATGCTTTTACCGA     | 30            |                          |                                                        | 36        | 100        | 18               | 0          | 0         | 10          | 27        | 3827804       | 3827787     |                                       |                              |                                         |                               |                                                     |                                            | 1                                               |
| 035_1_25                                                                                                  | ATTGATTAATATGCAAGGATGCTTGT     | 30            | AF145054                 | Streptococcus thermophilus bacteriophage 7201, comp    | 60        | 100        | 30               | 0          | 0         | 1           | 30        | 1810          | 1781        |                                       |                              |                                         |                               |                                                     |                                            | 1                                               |
| 035_1_26                                                                                                  | GAGAAGTAGCCATTCGCGCCATTCGCGGG  | 30            |                          |                                                        | 38        | 100        | 19               | 0          | 0         | 10          | 28        | 1109646       | 1109664     |                                       |                              |                                         |                               |                                                     |                                            | 1                                               |
| 035_3_01                                                                                                  | CTGACGCTCTAGTCAGCAGCACTGACGACT | 30            | CP000420                 | Streptococcus thermophilus LMD-9 plasmid 1, complete   | 58        | 100        | 29               | 0          | 0         | 2           | 30        | 1008          | 980         |                                       |                              |                                         |                               |                                                     |                                            | 1                                               |
| 035_3_02                                                                                                  | TTGAGTTGGCTTTTTTAAACAACTC      | 30            | U88974                   | Streptococcus thermophilus temperate bacteriophage C   | 42        | 96         | 25               | 1          | 0         | 3           | 27        | 22283         | 22307       |                                       |                              |                                         |                               |                                                     |                                            | 1                                               |
| 035_3_03                                                                                                  | GAATAACGCTAAAGAGCAGTTAAGAAGT   | 30            | AF158600                 | Streptococcus thermophilus bacteriophage Sfi11, comp   | 54        | 100        | 27               | 0          | 0         | 1           | 27        | 27362         | 27388       |                                       |                              |                                         |                               |                                                     |                                            | 1                                               |
| 035_3_04                                                                                                  | TGTCGCGCTGCTCTATGACCGCTGAGTCT  | 30            |                          |                                                        | 36        | 100        | 18               | 0          | 0         | 3           | 20        | 399791        | 399808      |                                       |                              |                                         |                               |                                                     |                                            | 1                                               |
| 035_3_05                                                                                                  | GTTGACAGTTAAATATAGCTTACAGGAAA  | 30            |                          |                                                        | 36        | 100        | 18               | 0          | 0         | 8           | 25        | 993445        | 993462      |                                       |                              |                                         |                               |                                                     |                                            | 1                                               |
| 035_3_06                                                                                                  | GCTTCTGAATACAGAAACGCTTGTGACT   | 30            |                          |                                                        | 38        | 100        | 19               | 0          | 0         | 11          | 29        | 5029419       | 5029437     |                                       |                              |                                         |                               |                                                     |                                            | 1                                               |
| 035_3_07                                                                                                  | CCATATGATCAAGATGATGCTGTGCTGCA  | 30            |                          |                                                        | 34        | 100        | 17               | 0          | 0         | 4           | 20        | 34725         | 34709       |                                       |                              |                                         |                               |                                                     |                                            | 1                                               |
| 035_3_08                                                                                                  | ATGGAAGAACCAATTCAGCCGCAAGGCTC  | 30            |                          |                                                        | 36        | 95         | 22               | 1          | 0         | 5           | 28        | 577404        | 577425      |                                       |                              |                                         |                               |                                                     |                                            | 1                                               |
| 035_3_11                                                                                                  | AGTGTTTTCTGAACACCTTCAAGCTCAG   | 30            |                          |                                                        | 36        | 100        | 18               | 0          | 0         | 5           | 22        | 735           | 718         |                                       |                              |                                         |                               |                                                     |                                            | 1                                               |
| 035_3_12                                                                                                  | TTATATTTTTAAGCGCGCTAGTTTGGCT   | 30            |                          |                                                        | 36        | 100        | 18               | 0          | 0         | 6           | 23        | 3134047       | 3134030     |                                       |                              |                                         |                               |                                                     |                                            | 1                                               |
| 036_1_01                                                                                                  | ACTTACAGAGGATATCAACTAGCTTTAG   | 30            |                          |                                                        | 36        | 100        | 18               | 0          | 0         | 12          | 29        | 4142986       | 4143003     |                                       |                              |                                         |                               |                                                     |                                            | 1                                               |
| 036_1_02                                                                                                  | AAAATAGCACCA                   |               |                          |                                                        |           |            |                  |            |           |             |           |               |             |                                       |                              |                                         |                               |                                                     |                                            |                                                 |

| spacer identification (strain reference in Fig. 5, CRISPR locus, and spacer position from the leader end) | spacer sequence                 | spacer length | subject accession number | subject definition                                             | bit score | % identity | alignment length | mismatches | gaps | query start | query end | subject start | subject end | BLAST hit with S. thermophilus phages | BLAST hit with other viruses | BLAST hit with S. thermophilus plasmids | BLAST hit with other plasmids | BLAST hit with S. thermophilus chromosomal sequence | BLAST hit with other chromosomal sequences | No significant BLAST hit (bit score below 40.1) |
|-----------------------------------------------------------------------------------------------------------|---------------------------------|---------------|--------------------------|----------------------------------------------------------------|-----------|------------|------------------|------------|------|-------------|-----------|---------------|-------------|---------------------------------------|------------------------------|-----------------------------------------|-------------------------------|-----------------------------------------------------|--------------------------------------------|-------------------------------------------------|
| 044_1_01                                                                                                  | CAATAGTACCAGGAGTACCACTTCAATCA   | 30            |                          |                                                                | 36        | 95         | 22               | 1          | 0    | 7           | 28        | 450270        | 450249      |                                       |                              |                                         |                               |                                                     |                                            |                                                 |
| 045_3_01                                                                                                  | CCTTATCCGCAACTCCAGAGGGATCGGTA   | 31            |                          |                                                                | 38        | 100        | 19               | 0          | 5    | 23          | 663       | 681           |             |                                       |                              |                                         |                               |                                                     |                                            | 1                                               |
| 046_3_01                                                                                                  | TGCAATTCCTATTAGTCTTGACGCCCTTT   | 30            | AF085222                 | Streptococcus thermophilus bacteriophage DT1, complete genome  | 60        | 100        | 30               | 0          | 1    | 30          | 1002      | 973           | 1           |                                       |                              |                                         |                               |                                                     |                                            |                                                 |
| 048_1_01                                                                                                  | TTTAACTTTATCTTTTAAAGATGATT      | 30            |                          |                                                                | 38        | 96         | 23               | 1          | 0    | 6           | 28        | 1054784       | 1054806     |                                       |                              |                                         |                               |                                                     |                                            | 1                                               |
| 048_3_01                                                                                                  | GACCCAGAGTACTTATAAAGCAATCAT     | 30            |                          |                                                                | 34        | 100        | 17               | 0          | 4    | 20          | 255039    | 255055        |             |                                       |                              |                                         |                               |                                                     |                                            | 1                                               |
| 048_3_02                                                                                                  | CGGTTATACCGTAAGCGACAACTTGTTA    | 30            | AY250830                 | Streptococcus thermophilus plasmid pND103, complete genome     | 60        | 100        | 30               | 0          | 1    | 30          | 960       | 931           |             |                                       |                              |                                         |                               |                                                     |                                            | 1                                               |
| 048_3_03                                                                                                  | TCTGACGGTTAGATAGTATTTTAACTGGTAA | 30            | AY699705                 | Streptococcus thermophilus bacteriophage 2972, complete genome | 52        | 97         | 30               | 1          | 0    | 1           | 30        | 23182         | 23211       | 1                                     |                              |                                         |                               |                                                     |                                            | 1                                               |
| 049_1_01                                                                                                  | CCTAAATCATTTTCAACGAGTTGGGATA    | 30            | AF348744                 | Streptococcus thermophilus bacteriophage DT1.1 host            | 58        | 100        | 29               | 0          | 2    | 30          | 637       | 609           | 1           |                                       |                              |                                         |                               |                                                     |                                            | 1                                               |
| 049_1_02                                                                                                  | AATAAATGCTATGATACAGGTGACGATA    | 30            | CP000421                 | Streptococcus thermophilus LMD-9 plasmid 2, complete genome    | 60        | 100        | 30               | 0          | 1    | 30          | 1700      | 1671          |             |                                       |                              |                                         |                               |                                                     |                                            | 1                                               |
| 050_1_01                                                                                                  | AACATCTTCCACATCTACAAACAGGAAT    | 30            | AF148566                 | Streptococcus thermophilus bacteriophage J1 putative           | 60        | 100        | 30               | 0          | 1    | 30          | 709       | 680           | 1           |                                       |                              |                                         |                               |                                                     |                                            | 1                                               |
| 050_1_02                                                                                                  | CTTGCAATAGACCCATTAAAGTCAATAT    | 30            |                          |                                                                | 34        | 100        | 17               | 0          | 14   | 30          | 23268     | 22374         |             |                                       |                              |                                         |                               |                                                     |                                            | 1                                               |
| 051_1_01                                                                                                  | CGTGGACGGTGGTGGGGTTTAAAGCCCG    | 30            | AF145054                 | Streptococcus thermophilus bacteriophage 7201, complete genome | 50        | 97         | 29               | 1          | 0    | 2           | 30        | 11149         | 11177       | 1                                     |                              |                                         |                               |                                                     |                                            | 1                                               |
| 051_1_02                                                                                                  | AGCCCAAGTCAGACATCCGTCCGAAGC     | 29            | AJ238049                 | Streptococcus thermophilus partial repA gene, ORF1 to          | 58        | 100        | 29               | 0          | 1    | 29          | 626       | 688           |             |                                       |                              |                                         |                               |                                                     |                                            | 1                                               |
| 051_1_03                                                                                                  | ATTGGGTTCCGTAAGAACAATAACCA      | 30            |                          |                                                                | 34        | 100        | 17               | 0          | 5    | 21          | 830       | 814           |             |                                       |                              |                                         |                               |                                                     |                                            | 1                                               |
| 051_1_04                                                                                                  | CACAAAATATCCGGTAGTTTTACTACT     | 30            | AF348739                 | Streptococcus thermophilus bacteriophage DT2 host sp           | 48        | 96         | 28               | 1          | 1    | 28          | 1223      | 1250          | 1           |                                       |                              |                                         |                               |                                                     |                                            | 1                                               |
| 051_1_05                                                                                                  | TTTGACCGTTTATTAGCGTGGCTAAAGT    | 29            | CP000421                 | Streptococcus thermophilus LMD-9 plasmid 2, complete genome    | 58        | 100        | 29               | 0          | 1    | 29          | 2608      | 2636          |             |                                       |                              |                                         |                               |                                                     |                                            | 1                                               |
| 051_1_06                                                                                                  | AATATCTACAGCTACTGAAAGCTACGCT    | 30            | AF145054                 | Streptococcus thermophilus bacteriophage 7201, complete genome | 60        | 100        | 30               | 0          | 1    | 30          | 24847     | 24876         | 1           |                                       |                              |                                         |                               |                                                     |                                            | 1                                               |
| 051_3_01                                                                                                  | CATATCACCTCATATTCAGTITTTGATGA   | 30            | AY250830                 | Streptococcus thermophilus plasmid pND103, complete genome     | 60        | 100        | 30               | 0          | 1    | 30          | 1219      | 1190          |             |                                       |                              |                                         |                               |                                                     |                                            | 1                                               |
| 051_3_05                                                                                                  | TGATGGACGAGACGGTATCCAGGAAACC    | 30            | AY699705                 | Streptococcus thermophilus bacteriophage 2972, complete genome | 48        | 96         | 28               | 1          | 1    | 28          | 20149     | 20176         | 1           |                                       |                              |                                         |                               |                                                     |                                            | 1                                               |
| 051_3_06                                                                                                  | TTTGGAAAAGGGCTTTTACTAATGATTA    | 30            |                          |                                                                | 38        | 100        | 19               | 0          | 2    | 20          | 183       | 165           |             |                                       |                              |                                         |                               |                                                     |                                            | 1                                               |
| 051_3_07                                                                                                  | ATATCTACGATGGCGAAGATTACAACATAG  | 31            |                          |                                                                | 36        | 95         | 22               | 1          | 0    | 4           | 25        | 18159         | 18180       |                                       |                              |                                         |                               |                                                     |                                            | 1                                               |
| 051_3_10                                                                                                  | TATTGAAACGAGCGTCCCTTTTAAAGCCATC | 30            |                          |                                                                | 34        | 100        | 17               | 0          | 12   | 28          | 2858828   | 2858812       |             |                                       |                              |                                         |                               |                                                     |                                            | 1                                               |
| 051_3_12                                                                                                  | TGAATCTTCAATTTAACTCAGTTGGTAC    | 30            | AF158600                 | Streptococcus thermophilus bacteriophage Sf11, complete genome | 52        | 97         | 30               | 1          | 0    | 1           | 30        | 34634         | 34663       | 1                                     |                              |                                         |                               |                                                     |                                            | 1                                               |
| 051_3_13                                                                                                  | AATAAATAAGTATACAGGCTCAAGGCA     | 30            | AF115102                 | Streptococcus thermophilus bacteriophage Sf19, complete genome | 46        | 96         | 27               | 1          | 0    | 1           | 27        | 1793          | 1819        | 1                                     |                              |                                         |                               |                                                     |                                            | 1                                               |
| 052_1_01                                                                                                  | TTAGATCTCATGAGTGGCGACAGTGAAGT   | 30            | AY196178                 | Streptococcus thermophilus bacteriophage kappa3 putative       | 60        | 100        | 30               | 0          | 1    | 30          | 589       | 618           | 1           |                                       |                              |                                         |                               |                                                     |                                            | 1                                               |
| 053_1_01                                                                                                  | GCATTCATGGTITTTGGTATTTAAAGTAT   | 30            | AF348736                 | Streptococcus thermophilus bacteriophage MD2 putative          | 60        | 100        | 30               | 0          | 1    | 30          | 920       | 891           | 1           |                                       |                              |                                         |                               |                                                     |                                            | 1                                               |
| 054_1_01                                                                                                  | GCTAGTGAAGCTACGAGGTTGGTAACTCT   | 30            | AF348736                 | Streptococcus thermophilus bacteriophage MD2 putative          | 60        | 100        | 30               | 0          | 1    | 30          | 5562      | 5591          | 1           |                                       |                              |                                         |                               |                                                     |                                            | 1                                               |
| 054_1_02                                                                                                  | TAGTGTAAAGCGCTTAAAGCTACGCGATA   | 30            | AF085222                 | Streptococcus thermophilus bacteriophage DT1, complete genome  | 60        | 100        | 30               | 0          | 1    | 30          | 13255     | 13294         | 1           |                                       |                              |                                         |                               |                                                     |                                            | 1                                               |
| 055_1_01                                                                                                  | TATTTTATGATCATCTAGTCCGCTAAGCC   | 30            | AF085222                 | Streptococcus thermophilus bacteriophage DT1, complete genome  | 60        | 100        | 30               | 0          | 1    | 30          | 2603      | 2574          | 1           |                                       |                              |                                         |                               |                                                     |                                            | 1                                               |
| 056_1_01                                                                                                  | TGCTCTTATGCGGATGGACCTGTCTGTA    | 30            | AF158600                 | Streptococcus thermophilus bacteriophage Sf11, complete genome | 40        | 100        | 20               | 0          | 2    | 21          | 9220      | 9239          | 1           |                                       |                              |                                         |                               |                                                     |                                            | 1                                               |
| 056_1_02                                                                                                  | AAGAAGATAAAGAAAAGTAAACACTACT    | 30            |                          |                                                                | 36        | 100        | 18               | 0          | 1    | 18          | 1046249   | 1046232       |             |                                       |                              |                                         |                               |                                                     |                                            | 1                                               |
| 057_1_01                                                                                                  | TAGTAAAGATCTGGGTTGATGTCTCGT     | 30            | AM406671                 | Lactococcus lactis subsp. cremoris MG1363, complete genome     | 48        | 100        | 24               | 0          | 5    | 28          | 653138    | 653161        |             |                                       |                              |                                         |                               |                                                     |                                            | 1                                               |
| 057_1_02                                                                                                  | TTCTTTGGTTTATCCAAATGACACCCCT    | 30            | AY250830                 | Streptococcus thermophilus plasmid pND103, complete genome     | 60        | 100        | 30               | 0          | 1    | 30          | 3451      | 3422          |             |                                       |                              |                                         |                               |                                                     |                                            | 1                                               |
| 057_1_03                                                                                                  | TCACATCTAGCGATAATCTGTTGCTTC     | 29            |                          |                                                                | 34        | 100        | 17               | 0          | 9    | 25          | 549382    | 549366        |             |                                       |                              |                                         |                               |                                                     |                                            | 1                                               |
| 057_1_04                                                                                                  | ATAGCTTCATTCGCGCTTTTAAATTTGACT  | 30            |                          |                                                                | 38        | 100        | 19               | 0          | 4    | 22          | 2727513   | 2727495       |             |                                       |                              |                                         |                               |                                                     |                                            | 1                                               |
| 057_1_05                                                                                                  | AACAAACAAAGCAATACAAACAGTAAACACC | 30            |                          |                                                                | 36        | 92         | 26               | 2          | 3    | 28          | 2570839   | 2570864       |             |                                       |                              |                                         |                               |                                                     |                                            | 1                                               |
| 057_1_06                                                                                                  | CTAAACTCGTTTGAAGGTTCAACTCACTCT  | 30            | U88974                   | Streptococcus thermophilus temperate bacteriophage C           | 40        | 93         | 28               | 2          | 1    | 28          | 28601     | 28574         | 1           |                                       |                              |                                         |                               |                                                     |                                            | 1                                               |
| 057_1_07                                                                                                  | GAGGTTGAATGATGAGTGACACCTATTTGT  | 30            |                          |                                                                | 32        | 100        | 16               | 0          | 2    | 17          | 14804     | 14789         |             |                                       |                              |                                         |                               |                                                     |                                            | 1                                               |
| 058_1_01                                                                                                  | AAAATTTGGTATGGCATGTTTATGCTGCTC  | 30            | DQ665367                 | Turnip ringspot virus RNA1 polymerase gene, partial contig     | 42        | 100        | 21               | 0          | 1    | 21          | 350       | 370           |             |                                       |                              |                                         |                               |                                                     |                                            | 1                                               |
| 058_1_02                                                                                                  | ATGGAGGTGTAAGAAATACAGCCAGGAACT  | 30            | AF177168                 | Streptococcus thermophilus plasmid pER36, complete genome      | 60        | 100        | 30               | 0          | 1    | 30          | 2044      | 2015          |             |                                       |                              |                                         |                               |                                                     |                                            | 1                                               |
| 058_1_03                                                                                                  | ACAGTAAGATACAGTATGATGAAITG      | 29            | U88974                   | Streptococcus thermophilus temperate bacteriophage C           | 50        | 97         | 29               | 1          | 0    | 1           | 29        | 15007         | 15035       | 1                                     |                              |                                         |                               |                                                     |                                            | 1                                               |
| 058_1_04                                                                                                  | AAGACATATCTTTTAAACATCTGAAGAG    | 30            | AY699705                 | Streptococcus thermophilus bacteriophage 2972, complete genome | 60        | 100        | 30               | 0          | 1    | 30          | 16799     | 16828         | 1           |                                       |                              |                                         |                               |                                                     |                                            | 1                                               |
| 058_1_05                                                                                                  | TAAAGCTACTCGACAGCATGTTAATATC    | 30            | AJ239949                 | Streptococcus thermophilus partial repA gene, ORF1 to          | 60        | 100        | 30               | 0          | 1    | 30          | 6243      | 6272          |             |                                       |                              |                                         |                               |                                                     |                                            | 1                                               |
| 058_1_09                                                                                                  | TGATAGATACATGCTGATGATGATAT      | 30            |                          |                                                                | 34        | 100        | 16               | 0          | 5    | 20          | 216       | 231           |             |                                       |                              |                                         |                               |                                                     |                                            | 1                                               |
| 058_1_10                                                                                                  | GAACAAGTAAAGGAGGAGTGAAGAGTCCG   | 31            |                          |                                                                | 34        | 100        | 17               | 0          | 15   | 31          | 1012      | 1028          |             |                                       |                              |                                         |                               |                                                     |                                            | 1                                               |
| 058_1_11                                                                                                  | ACGAGTGGGCTTACAGTACGAGCTGGATA   | 30            | AF158600                 | Streptococcus thermophilus bacteriophage Sf11, complete genome | 60        | 100        | 30               | 0          | 1    | 30          | 38054     | 38083         | 1           |                                       |                              |                                         |                               |                                                     |                                            | 1                                               |
| 058_1_15                                                                                                  | GCCAGCATCGGAAATGGGCTTGTATCCG    | 30            |                          |                                                                | 36        | 100        | 18               | 0          | 12   | 29          | 1211371   | 1211388       |             |                                       |                              |                                         |                               |                                                     |                                            | 1                                               |
| 058_1_16                                                                                                  | TGCAAAAGCGGTTGCTGCTGCTGCTGGC    | 29            | CP000473                 | Soilbacter ustulatus Ellin6076, complete genome                | 44        | 100        | 22               | 0          | 8    | 29          | 5218276   | 5218297       |             |                                       |                              |                                         |                               |                                                     |                                            | 1                                               |
| 058_1_17                                                                                                  | AGACATCCGCTTCTTGTTTAAAGCCAT     | 30            |                          |                                                                | 36        | 100        | 18               | 0          | 2    | 19          | 4041727   | 4041710       |             |                                       |                              |                                         |                               |                                                     |                                            | 1                                               |
| 058_1_18                                                                                                  | CTTGAATCTGCTTGAAGTATGATGCTGAT   | 30            | AF145054                 | Streptococcus thermophilus bacteriophage 7201, complete genome | 60        | 100        | 30               | 0          | 1    | 30          | 24560     | 24531         | 1           |                                       |                              |                                         |                               |                                                     |                                            | 1                                               |
| 058_1_19                                                                                                  | CGAAGTTCGACAACTGGGAAATGGGATC    | 30            |                          |                                                                | 34        | 100        | 17               | 0          | 7    | 23          | 1909647   | 1909663       |             |                                       |                              |                                         |                               |                                                     |                                            | 1                                               |
| 058_1_20                                                                                                  | TAAAGAACTGCGGAGAACTAAAGCTG      | 30            | AF348736                 | Streptococcus thermophilus bacteriophage MD2 putative          | 52        | 100        | 26               | 0          | 1    | 26          | 3621      | 3646          | 1           |                                       |                              |                                         |                               |                                                     |                                            | 1                                               |
| 058_1_21                                                                                                  | CTCACTAGTCCATATAGTGGGTTAGGGAA   | 29            | AF085222                 | Streptococcus thermophilus bacteriophage DT1, complete genome  | 42        | 93         | 29               | 2          | 1    | 29          | 24458     | 24486         | 1           |                                       |                              |                                         |                               |                                                     |                                            | 1                                               |
| 058_1_22                                                                                                  | TGATCTACACCTCAAAACGGTGAATGATC   | 30            | AF145054                 | Streptococcus thermophilus bacteriophage 7201, complete genome | 60        | 100        | 30               | 0          | 1    | 30          | 226       | 255           | 1           |                                       |                              |                                         |                               |                                                     |                                            | 1                                               |
| 058_1_23                                                                                                  | GCACAAGTGTATAATTTCCACACAGCC     | 30            |                          |                                                                | 36        | 100        | 18               | 0          | 12   | 29          | 82603     | 82620         |             |                                       |                              |                                         |                               |                                                     |                                            | 1                                               |
| 058_1_24                                                                                                  | GCATACGGTGTAAACAACACCCACCC      | 29            |                          |                                                                | 36        | 100        | 18               | 0          | 1    | 18          | 2314931   | 2314948       |             |                                       |                              |                                         |                               |                                                     |                                            | 1                                               |
| 059_1_01                                                                                                  | GACGTTCAATGAAATTTCTTATCAGACAT   | 30            | AY250830                 | Streptococcus thermophilus plasmid pND103, complete genome     | 60        | 100        | 30               | 0          | 1    | 30          | 1462      | 1433          |             |                                       |                              |                                         |                               |                                                     |                                            | 1                                               |
| 059_1_02                                                                                                  | TCTGACGTAAGAAATATCTCAAGGGT      | 30            | AF177167                 | Streptococcus thermophilus plasmid pER35, complete genome      | 60        | 100        | 30               | 0          | 1    | 30          | 1175      | 1204          | 1           |                                       |                              |                                         |                               |                                                     |                                            | 1                                               |
| 059_1_03                                                                                                  | GGTGGCATGGAATTCATGACAAAGGAC     | 30            |                          |                                                                | 38        | 96         | 23               | 1          | 0    | 8           | 30        | 2132677       | 2132699     |                                       |                              |                                         |                               |                                                     |                                            | 1                                               |
| 059_1_09                                                                                                  | CAGTTTCAAATGCTCCACACCGATATTA    | 30            | AF115103                 | Streptococcus thermophilus bacteriophage Sf21, complete genome | 46        | 96         | 27               | 1          | 0    | 4           | 30        | 5508          | 5482        | 1                                     |                              |                                         |                               |                                                     |                                            | 1                                               |
| 059_1_10                                                                                                  | GTTCCGTTGACGTTGTTTATCTCAACT     | 30            | AF020798                 | Streptococcus thermophilus bacteriophage lysogeny mix          | 52        | 97         | 30               | 1          | 0    | 1           | 30        | 2045          | 2016        | 1                                     |                              |                                         |                               |                                                     |                                            | 1                                               |
| 059_1_11                                                                                                  | ACATGTCATCATCTGATACGAGTCAAG     | 30            |                          |                                                                | 36        | 90         | 30               | 3          | 1    | 30          | 8004      | 8033          |             |                                       |                              |                                         |                               |                                                     |                                            | 1                                               |
| 059_1_12                                                                                                  | GGATTCACATTTATGCCACGGGTTGGTAG   | 30            |                          |                                                                | 38        | 100        | 19               | 0          | 4    | 22          | 3198      | 3180          |             |                                       |                              |                                         |                               |                                                     |                                            | 1                                               |
| 059_3_02                                                                                                  | CTAAGTGTGATGATGCTGACAGTCTACT    | 30            | AF115103                 | Streptococcus thermophilus bacteriophage Sf21, complete genome | 42        | 96         | 25               | 1          | 0    | 5           | 29        | 14213         | 14237       | 1                                     |                              |                                         |                               |                                                     |                                            | 1                                               |
| 059_3_03                                                                                                  | TATACCGCACTTCCATATCTACAAAGTCC   | 30            |                          |                                                                | 38        | 100        | 19               | 0          | 9    | 27          | 8304      |               |             |                                       |                              |                                         |                               |                                                     |                                            |                                                 |

| spacer identification (strain reference in Fig. 5, CRISPR locus, and spacer position from the leader end) | spacer sequence                    | spacer length | subject accession number | subject definition                                      | bit score | % identity | alignment length | mismatches | gap opens | query start | query end | subject start | subject end | BLAST hit with S. thermophilus phages | BLAST hit with other viruses | BLAST hit with S. thermophilus plasmids | BLAST hit with other plasmids | BLAST hit with S. thermophilus chromosomal sequence | BLAST hit with other chromosomal sequences | No significant BLAST hit (bit score below 40.1) |  |
|-----------------------------------------------------------------------------------------------------------|------------------------------------|---------------|--------------------------|---------------------------------------------------------|-----------|------------|------------------|------------|-----------|-------------|-----------|---------------|-------------|---------------------------------------|------------------------------|-----------------------------------------|-------------------------------|-----------------------------------------------------|--------------------------------------------|-------------------------------------------------|--|
| 064_3_03                                                                                                  | TGGTTATATAGAAAACCGCACTTGGATA       | 30            | AJ239049                 | Streptococcus thermophilus partial repA gene, ORF1 to   | 100       | 30         | 0                | 0          | 1         | 30          | 1757      | 1786          |             |                                       |                              |                                         |                               |                                                     |                                            |                                                 |  |
| 064_3_04                                                                                                  | CTTGACTGACAAATGAGCAACATAGAGTA      | 31            |                          |                                                         | 36        | 95         | 22               | 1          | 0         | 3           | 24        | 104202        | 104181      |                                       |                              |                                         |                               |                                                     |                                            |                                                 |  |
| 064_3_05                                                                                                  | AAGTAATTTGTAATGCAATAATACAT         | 30            |                          |                                                         | 38        | 100        | 19               | 0          | 0         | 12          | 30        | 560595        | 560577      |                                       |                              |                                         |                               |                                                     |                                            |                                                 |  |
| 064_3_06                                                                                                  | AGTCTATGGGTTTAAATTTTGTATAA         | 29            |                          |                                                         | 38        | 100        | 19               | 0          | 0         | 5           | 23        | 4108876       | 4108858     |                                       |                              |                                         |                               |                                                     |                                            |                                                 |  |
| 064_3_07                                                                                                  | CAAAGCAGAGGCGTTTGGACCAATTTGT       | 30            |                          |                                                         | 36        | 100        | 18               | 0          | 0         | 2           | 19        | 61765         | 61782       |                                       |                              |                                         |                               |                                                     |                                            |                                                 |  |
| 064_3_08                                                                                                  | AGCTAGTGCCCTGAGCCTTCCCAATAAGGGA    | 30            |                          |                                                         | 38        | 100        | 19               | 0          | 0         | 5           | 23        | 182717        | 182699      |                                       |                              |                                         |                               |                                                     |                                            |                                                 |  |
| 064_3_09                                                                                                  | GCTAGCACCTTCAATTTCTTGTAAATATGA     | 30            |                          |                                                         | 36        | 100        | 18               | 0          | 0         | 6           | 23        | 3739          | 3722        |                                       |                              |                                         |                               |                                                     |                                            |                                                 |  |
| 064_3_10                                                                                                  | TAGAGGTAATGATGGTATTCGAGGTAAAG      | 30            | AF145054                 | Streptococcus thermophilus bacteriophage 7201, comp     | 42        | 100        | 21               | 0          | 0         | 7           | 27        | 29055         | 29075       |                                       |                              |                                         |                               |                                                     |                                            |                                                 |  |
| 064_3_11                                                                                                  | TTTGGGTTGGTAACTCCTGACGCGCAAT       | 30            |                          |                                                         | 32        | 100        | 16               | 0          | 0         | 1           | 16        | 158156        | 158171      |                                       |                              |                                         |                               |                                                     |                                            |                                                 |  |
| 064_3_12                                                                                                  | TATGGAAGTCCGGGAATGCAACCGCTTGA      | 30            |                          |                                                         | 32        | 100        | 16               | 0          | 0         | 6           | 21        | 3458176       | 3458161     |                                       |                              |                                         |                               |                                                     |                                            |                                                 |  |
| 064_3_13                                                                                                  | ATTTTATGCGGTTTAACTCCCTTTTAAAGT     | 30            |                          |                                                         | 36        | 95         | 22               | 1          | 0         | 7           | 28        | 3746          | 3725        |                                       |                              |                                         |                               |                                                     |                                            |                                                 |  |
| 065_1_01                                                                                                  | AACCCGGTGGTTATGGGCTTGAGGAGTGT      | 30            |                          |                                                         | 34        | 100        | 17               | 0          | 0         | 7           | 23        | 1455213       | 1455197     |                                       |                              |                                         |                               |                                                     |                                            |                                                 |  |
| 065_1_02                                                                                                  | ATATTAATAGCGAATCTACTGCTCAACGCTG    | 30            |                          |                                                         | 34        | 100        | 17               | 0          | 0         | 1           | 17        | 731224        | 731240      |                                       |                              |                                         |                               |                                                     |                                            |                                                 |  |
| 065_1_03                                                                                                  | TCATCTTCAAGTAAATACCACTGTCAGGG      | 30            |                          |                                                         | 34        | 100        | 17               | 0          | 0         | 9           | 25        | 259           | 243         |                                       |                              |                                         |                               |                                                     |                                            |                                                 |  |
| 065_1_04                                                                                                  | TTTTGCCAAAGTAAAGGAACTCTACGCTG      | 29            |                          |                                                         | 36        | 100        | 18               | 0          | 0         | 8           | 25        | 618041        | 618058      |                                       |                              |                                         |                               |                                                     |                                            |                                                 |  |
| 066_2_02                                                                                                  | GGTCAGATATTTATGTCTGCTGAATGTTGATA   | 36            | AF115103                 | Streptococcus thermophilus bacteriophage Sf121, comp    | 64        | 97         | 36               | 1          | 0         | 1           | 36        | 23781         | 23746       |                                       |                              |                                         |                               |                                                     |                                            |                                                 |  |
| 066_2_03                                                                                                  | CTTCTCTCTATGTAATAATCTTTCATTTCAAG   | 35            |                          |                                                         | 38        | 100        | 19               | 0          | 0         | 17          | 35        | 3011259       | 3011241     |                                       |                              |                                         |                               |                                                     |                                            |                                                 |  |
| 066_2_04                                                                                                  | GTGACCTGTTTTAGCATTAAACAGCATGTCCAC  | 37            |                          |                                                         | 38        | 100        | 19               | 0          | 0         | 10          | 28        | 1946566       | 1946548     |                                       |                              |                                         |                               |                                                     |                                            |                                                 |  |
| 066_2_05                                                                                                  | CTTGGTGGTGAGATTTGCGAATTTCCAAAGACT  | 36            |                          |                                                         | 38        | 100        | 19               | 0          | 0         | 14          | 32        | 720156        | 720174      |                                       |                              |                                         |                               |                                                     |                                            |                                                 |  |
| 066_2_06                                                                                                  | ACCCTACTGGTTGTAGGTTATTTCCATAATCCTA | 37            |                          |                                                         | 32        | 100        | 16               | 0          | 0         | 20          | 35        | 607           | 622         |                                       |                              |                                         |                               |                                                     |                                            |                                                 |  |
| 066_3_01                                                                                                  | ATAGATACTGTAAGTCCGGCTAATGGCTCA     | 30            |                          |                                                         | 36        | 100        | 18               | 0          | 0         | 13          | 30        | 2731961       | 2731944     |                                       |                              |                                         |                               |                                                     |                                            |                                                 |  |
| 066_3_02                                                                                                  | CACATAAATCAACGATGTTTTAAGGCAAGCT    | 30            |                          |                                                         | 34        | 100        | 17               | 0          | 0         | 5           | 21        | 2701209       | 2701225     |                                       |                              |                                         |                               |                                                     |                                            |                                                 |  |
| 066_3_03                                                                                                  | AAGTTTTAAGTATCCATCTTCGTCGCAACA     | 30            | AJ242479                 | Streptococcus thermophilus res gene, ORF2 and ORF3      | 60        | 100        | 30               | 0          | 0         | 1           | 30        | 3190          | 3161        |                                       |                              |                                         |                               |                                                     |                                            |                                                 |  |
| 066_3_04                                                                                                  | TTGATATTACCTTTTGAAGTGGTATCTCTG     | 30            |                          |                                                         | 34        | 100        | 17               | 0          | 0         | 12          | 28        | 79            | 63          |                                       |                              |                                         |                               |                                                     |                                            |                                                 |  |
| 066_3_05                                                                                                  | CTAGGCTAGATATATAAGCAAACTATTGT      | 30            | CP000024                 | Streptococcus thermophilus CNR21066, complete genome    | 60        | 100        | 30               | 0          | 0         | 1           | 30        | 731307        | 731336      |                                       |                              |                                         |                               |                                                     |                                            |                                                 |  |
| 066_3_06                                                                                                  | TATGGCATATAATCAGAAATACCCATTACAC    | 30            | DQ512735                 | Clostridium botulinum neurotoxin type E gene, partial c | 40        | 100        | 20               | 0          | 0         | 7           | 26        | 503           | 484         |                                       |                              |                                         |                               |                                                     |                                            |                                                 |  |
| 066_3_07                                                                                                  | GTTGAGTATTCGTTGTAACATGACAAGT       | 31            |                          |                                                         | 32        | 100        | 16               | 0          | 0         | 5           | 20        | 1697816       | 1697801     |                                       |                              |                                         |                               |                                                     |                                            |                                                 |  |
| 066_3_08                                                                                                  | ATGAGGTGAAATAAAGACCGCTTGTATCT      | 30            |                          |                                                         | 36        | 100        | 18               | 0          | 0         | 5           | 22        | 2246714       | 2246731     |                                       |                              |                                         |                               |                                                     |                                            |                                                 |  |
| 066_3_09                                                                                                  | ACACATGCTCTTCTTCAACCAATCGG         | 30            | AF115102                 | Streptococcus thermophilus bacteriophage Sf19, comp     | 60        | 100        | 30               | 0          | 0         | 1           | 30        | 7026          | 7055        |                                       |                              |                                         |                               |                                                     |                                            |                                                 |  |
| 066_3_10                                                                                                  | GGCTAAATCGTTCTACGAGGCTTTTAT        | 30            | AF145054                 | Streptococcus thermophilus bacteriophage 7201, comp     | 42        | 96         | 25               | 1          | 0         | 6           | 30        | 11229         | 11205       |                                       |                              |                                         |                               |                                                     |                                            |                                                 |  |
| 066_3_11                                                                                                  | GCGTAAAGTCAAGCAACTAATAAGAAAT       | 30            | DQ295022                 | Streptococcus thermophilus plasmid pSMO-316, comp       | 60        | 100        | 30               | 0          | 0         | 1           | 30        | 1157          | 1186        |                                       |                              |                                         |                               |                                                     |                                            |                                                 |  |
| 066_3_12                                                                                                  | AGCCTTTAGCCTAGTTTTTACATGACCGCA     | 30            | AF115103                 | Streptococcus thermophilus bacteriophage Sf121, comp    | 56        | 100        | 28               | 0          | 0         | 1           | 28        | 10766         | 10739       |                                       |                              |                                         |                               |                                                     |                                            |                                                 |  |
| 066_3_13                                                                                                  | CTGAAAGCAGTAAAGCAACTCTACTTGGAACT   | 30            |                          |                                                         | 34        | 100        | 17               | 0          | 0         | 2           | 18        | 2316197       | 2316213     |                                       |                              |                                         |                               |                                                     |                                            |                                                 |  |
| 066_3_14                                                                                                  | CATTGATGGGAATTAAGTCAGCTTGGTT       | 30            | U88974                   | Streptococcus thermophilus temperate bacteriophage C    | 60        | 100        | 30               | 0          | 0         | 1           | 30        | 23299         | 23328       |                                       |                              |                                         |                               |                                                     |                                            |                                                 |  |
| 066_3_15                                                                                                  | TTGAGAGTAACTGACATGCAATCTCAT        | 30            | AF145054                 | Streptococcus thermophilus bacteriophage 7201, comp     | 62        | 100        | 26               | 0          | 0         | 1           | 26        | 25529         | 25554       |                                       |                              |                                         |                               |                                                     |                                            |                                                 |  |
| 066_3_16                                                                                                  | CCTAATGCCAATGATTTTGAAGATTA         | 30            | AF085222                 | Streptococcus thermophilus bacteriophage DT1, comp      | 62        | 100        | 26               | 0          | 0         | 5           | 30        | 3791          | 3816        |                                       |                              |                                         |                               |                                                     |                                            |                                                 |  |
| 066_3_17                                                                                                  | AATTACAAAGTCAAGTTGGCTGAAGAAAT      | 30            | AF158600                 | Streptococcus thermophilus bacteriophage Sf11, comp     | 52        | 97         | 30               | 1          | 0         | 1           | 30        | 37869         | 37898       |                                       |                              |                                         |                               |                                                     |                                            |                                                 |  |
| 068_1_01                                                                                                  | AAGAAGCGTTAAATGCTTCAACTGAATAG      | 30            | AF145054                 | Streptococcus thermophilus bacteriophage 7201, comp     | 44        | 93         | 30               | 2          | 0         | 1           | 30        | 12103         | 12074       |                                       |                              |                                         |                               |                                                     |                                            |                                                 |  |
| 068_1_02                                                                                                  | AATTGCTAAACATCAAAAGACTTAACGGG      | 30            |                          |                                                         | 34        | 100        | 17               | 0          | 0         | 7           | 23        | 1464939       | 1464955     |                                       |                              |                                         |                               |                                                     |                                            |                                                 |  |
| 068_1_03                                                                                                  | GATGAGATTTGACTGATGATAAAGAGAAA      | 30            | U88974                   | Streptococcus thermophilus temperate bacteriophage C    | 52        | 97         | 30               | 1          | 0         | 1           | 30        | 38326         | 38355       |                                       |                              |                                         |                               |                                                     |                                            |                                                 |  |
| 068_1_04                                                                                                  | GACATCGAAAGCACTTATAAATATTTTA       | 30            | AJ242479                 | Streptococcus thermophilus res gene, ORF2 and ORF3      | 60        | 100        | 30               | 0          | 0         | 1           | 30        | 3196          | 3225        |                                       |                              |                                         |                               |                                                     |                                            |                                                 |  |
| 068_1_05                                                                                                  | TTTGAATTAACAACCTGATTTGATATC        | 30            | AF145054                 | Streptococcus thermophilus bacteriophage 7201, comp     | 60        | 100        | 30               | 0          | 0         | 1           | 30        | 18677         | 18706       |                                       |                              |                                         |                               |                                                     |                                            |                                                 |  |
| 068_1_06                                                                                                  | TGATAGCGTCAAAGTTTTTCCACTAATAGCG    | 31            |                          |                                                         | 38        | 100        | 19               | 0          | 0         | 13          | 31        | 1624415       | 1624397     |                                       |                              |                                         |                               |                                                     |                                            |                                                 |  |
| 068_1_07                                                                                                  | ATGAGTTTATGCAAAATGATAGATAGCT       | 30            |                          |                                                         | 42        | 100        | 21               | 0          | 0         | 1           | 21        | 193973        | 193975      |                                       |                              |                                         |                               |                                                     |                                            |                                                 |  |
| 068_1_08                                                                                                  | AGGTTATGAAAAAGCGCAACATGACTAGT      | 30            | CP000514                 | Marinobacter aquaeolei V78, complete genome             | 38        | 93         | 27               | 2          | 0         | 4           | 30        | 40719         | 40745       |                                       |                              |                                         |                               |                                                     |                                            |                                                 |  |
| 068_1_09                                                                                                  | ATATAAGTCCCTTAAATATCCCACTA         | 30            | U88974                   | Streptococcus thermophilus temperate bacteriophage C    | 64        | 100        | 27               | 0          | 0         | 1           | 27        | 41413         | 41387       |                                       |                              |                                         |                               |                                                     |                                            |                                                 |  |
| 068_1_10                                                                                                  | TTGCTCAAGAGATCTCTGTTGCCAAG         | 30            | AF145054                 | Streptococcus thermophilus bacteriophage 7201, comp     | 40        | 93         | 28               | 2          | 0         | 3           | 30        | 13171         | 13144       |                                       |                              |                                         |                               |                                                     |                                            |                                                 |  |
| 068_1_11                                                                                                  | TOCCATAGTTTAAATGAGTCGGTTAACTTA     | 30            |                          |                                                         | 34        | 100        | 17               | 0          | 0         | 1           | 17        | 4432369       | 4432353     |                                       |                              |                                         |                               |                                                     |                                            |                                                 |  |
| 068_1_12                                                                                                  | GTGACTAAAAGTGGCTAAGTTCAATAAGG      | 30            |                          |                                                         | 34        | 100        | 17               | 0          | 0         | 13          | 29        | 2596399       | 2596415     |                                       |                              |                                         |                               |                                                     |                                            |                                                 |  |
| 068_1_13                                                                                                  | ATATAGTGAATGATTCAGCTGCGGCGTAG      | 30            |                          |                                                         | 36        | 92         | 26               | 2          | 0         | 1           | 26        | 17531         | 17506       |                                       |                              |                                         |                               |                                                     |                                            |                                                 |  |
| 068_1_14                                                                                                  | AAAAGCAAACTCGGCAATATAAAGGATATA     | 29            |                          |                                                         | 34        | 100        | 17               | 0          | 0         | 12          | 28        | 1056898       | 1056914     |                                       |                              |                                         |                               |                                                     |                                            |                                                 |  |
| 068_1_15                                                                                                  | TTGCTAATAAATTAATCAATAGGACT         | 30            | AY954970                 | Staphylococcus phage Twtot, complete genome             | 40        | 96         | 24               | 1          | 0         | 6           | 29        | 74620         | 74597       |                                       |                              |                                         |                               |                                                     |                                            |                                                 |  |
| 068_1_16                                                                                                  | TTATGATGAATGACATGGTTGATATAAGTA     | 30            |                          |                                                         | 36        | 92         | 26               | 2          | 0         | 1           | 26        | 18771         | 18746       |                                       |                              |                                         |                               |                                                     |                                            |                                                 |  |
| 068_1_17                                                                                                  | GAAAATTTCTGTTGTTCTTAATATTAGC       | 30            |                          |                                                         | 34        | 100        | 17               | 0          | 0         | 5           | 21        | 3926          | 3910        |                                       |                              |                                         |                               |                                                     |                                            |                                                 |  |
| 068_1_18                                                                                                  | TTTCTTAGGAATACCAGGAGTTCAGCTT       | 30            | DQ437519                 | Streptococcus thermophilus plasmid p291 chaperone       | 60        | 100        | 30               | 0          | 0         | 1           | 30        | 200           | 171         |                                       |                              |                                         |                               |                                                     |                                            |                                                 |  |
| 068_1_19                                                                                                  | TGGCAGAGATTACACAGCAACGGAACAGC      | 30            | AM279674                 | Streptococcus pneumoniae pSpnP1 plasmid                 | 52        | 97         | 30               | 1          | 0         | 1           | 30        | 483           | 512         |                                       |                              |                                         |                               |                                                     |                                            |                                                 |  |
| 068_1_20                                                                                                  | GGGTATCATGATCTAGTGTAGGACCTGA       | 30            |                          |                                                         | 34        | 100        | 17               | 0          | 0         | 9           | 25        | 2938153       | 2938137     |                                       |                              |                                         |                               |                                                     |                                            |                                                 |  |
| 068_1_21                                                                                                  | TTTTGAAAATGCAACACGCGTTTGTATAG      | 30            |                          |                                                         | 38        | 93         | 27               | 2          | 0         | 1           | 27        | 22328         | 22354       |                                       |                              |                                         |                               |                                                     |                                            |                                                 |  |
| 069_1_01                                                                                                  | AGAAGCTTCCCAAACTCTTTAGCATTA        | 30            | AY196178                 | Streptococcus thermophilus bacteriophage kappa3 puts    | 42        | 93         | 29               | 2          | 0         | 1           | 29        | 1124          | 1096        |                                       |                              |                                         |                               |                                                     |                                            |                                                 |  |
| 069_1_02                                                                                                  | TTAAGCTTTATCAAAATGATAGATAGCT       | 30            |                          |                                                         | 38        | 100        | 19               | 0          | 0         | 1           | 19        | 717024        | 717006      |                                       |                              |                                         |                               |                                                     |                                            |                                                 |  |
| 069_1_03                                                                                                  | CGTGTATGTTTATGAAATTAATAGTA         | 30            | U88974                   | Streptococcus thermophilus temperate bacteriophage C    | 52        | 97         | 30               | 1          | 0         | 1           | 30        | 41197         | 41226       |                                       |                              |                                         |                               |                                                     |                                            |                                                 |  |
| 069_1_04                                                                                                  | GTTCTTCAAGCGTACGACAACTAATACAC      | 30            |                          |                                                         | 32        | 100        | 16               | 0          | 0         | 1           | 17        | 208623        | 208638      |                                       |                              |                                         |                               |                                                     |                                            |                                                 |  |
| 069_1_05                                                                                                  | CGCCGTAAGTCAAGCAACTTTATGAACCG      | 30            | AF158600                 | Streptococcus thermophilus bacteriophage Sf11, comp     | 60        | 100        | 30               | 0          | 0         | 1           | 30        | 24121         | 24150       |                                       |                              |                                         |                               |                                                     |                                            |                                                 |  |
| 069_1_06                                                                                                  | TTTATTCCTTGGCAATACGTTCCACCTTT      | 30            | AF158600                 | Streptococcus thermophilus bacteriophage Sf11, comp     | 52        | 97         | 30               | 1          | 0         | 1           | 30        | 19866         | 19837       |                                       |                              |                                         |                               |                                                     |                                            |                                                 |  |
| 069_1_07                                                                                                  | AGATTATAAGGAACACCACTCAATATAG       | 30            |                          |                                                         | 36        | 100        | 18               | 0          | 0         |             |           |               |             |                                       |                              |                                         |                               |                                                     |                                            |                                                 |  |

| spacer identification (strain reference in Fig. 5, CRISPR locus, and spacer position from the leader end) | spacer length | subject accession number | subject definition                                      | bit score | % identity | alignment length | mismatches | gap opens | query start | query end | subject start | subject end | BLAST hit with S. thermophilus phages | BLAST hit with other viruses | BLAST hit with S. thermophilus plasmids | BLAST hit with other plasmids | BLAST hit with S. thermophilus chromosomal sequence | BLAST hit with other chromosomal sequences | No significant BLAST hit (bit score below 40.1) |
|-----------------------------------------------------------------------------------------------------------|---------------|--------------------------|---------------------------------------------------------|-----------|------------|------------------|------------|-----------|-------------|-----------|---------------|-------------|---------------------------------------|------------------------------|-----------------------------------------|-------------------------------|-----------------------------------------------------|--------------------------------------------|-------------------------------------------------|
| 075_1_06                                                                                                  | 30            | AF153414                 | Lactococcus lactis plasmid pCIS3, complete sequence     | 60        | 100        | 30               | 0          | 1         | 30          | 3058      | 3087          |             |                                       |                              |                                         |                               |                                                     |                                            |                                                 |
| 075_1_07                                                                                                  | 30            | AF158600                 | Streptococcus thermophilus bacteriophage Sf11, comp     | 48        | 100        | 24               | 0          | 5         | 28          | 29051     | 29074         | 1           |                                       |                              |                                         |                               |                                                     |                                            |                                                 |
| 075_1_08                                                                                                  | 30            |                          |                                                         | 34        | 95         | 21               | 1          | 0         | 3           | 23        | 387399        | 387379      |                                       |                              |                                         |                               |                                                     |                                            | 1                                               |
| 075_1_09                                                                                                  | 29            |                          |                                                         | 36        | 100        | 18               | 0          | 12        | 29          | 1058742   | 1058725       |             |                                       |                              |                                         |                               |                                                     |                                            | 1                                               |
| 075_1_10                                                                                                  | 30            | X64346                   | Saimirine herpesvirus 2 complete genome                 | 42        | 100        | 21               | 0          | 3         | 23          | 91557     | 91537         |             | 1                                     |                              |                                         |                               |                                                     |                                            | 1                                               |
| 075_1_11                                                                                                  | 30            |                          |                                                         | 36        | 100        | 18               | 0          | 12        | 29          | 125816    | 125799        |             |                                       |                              |                                         |                               |                                                     |                                            | 1                                               |
| 075_1_12                                                                                                  | 30            |                          |                                                         | 36        | 100        | 18               | 0          | 8         | 25          | 391103    | 391120        |             |                                       |                              |                                         |                               |                                                     |                                            | 1                                               |
| 075_1_13                                                                                                  | 30            | AF145054                 | Streptococcus thermophilus bacteriophage 7201, comp     | 56        | 100        | 28               | 0          | 3         | 30          | 35035     | 35062         | 1           |                                       |                              |                                         |                               |                                                     |                                            |                                                 |
| 075_1_14                                                                                                  | 30            |                          |                                                         | 36        | 100        | 18               | 0          | 12        | 29          | 389470    | 389453        |             |                                       |                              |                                         |                               |                                                     |                                            | 1                                               |
| 075_1_15                                                                                                  | 30            |                          |                                                         | 60        | 100        | 30               | 0          | 1         | 30          | 2356      | 2385          |             |                                       |                              |                                         |                               |                                                     |                                            | 1                                               |
| 075_1_16                                                                                                  | 30            | AJ242479                 | Streptococcus thermophilus res. gene, ORF2 and ORF3     | 34        | 92         | 25               | 2          | 0         | 2           | 28        | 4085          | 4061        |                                       |                              | 1                                       |                               |                                                     |                                            |                                                 |
| 075_1_17                                                                                                  | 30            |                          |                                                         | 34        | 100        | 17               | 0          | 7         | 23          | 4219426   | 4219442       |             |                                       |                              |                                         |                               |                                                     |                                            | 1                                               |
| 075_1_18                                                                                                  | 30            |                          |                                                         | 36        | 100        | 18               | 0          | 6         | 23          | 2203700   | 2203683       |             |                                       |                              |                                         |                               |                                                     |                                            | 1                                               |
| 075_1_19                                                                                                  | 30            | AF115102                 | Streptococcus thermophilus bacteriophage Sf19, comp     | 54        | 100        | 27               | 0          | 1         | 27          | 9300      | 9326          | 1           |                                       |                              |                                         |                               |                                                     |                                            |                                                 |
| 075_1_20                                                                                                  | 29            |                          |                                                         | 34        | 100        | 17               | 0          | 4         | 20          | 198050    | 198034        |             |                                       |                              |                                         |                               |                                                     |                                            | 1                                               |
| 075_1_21                                                                                                  | 31            | CP000439                 | Francisella tularensis subsp. novicida U112, complete g | 40        | 100        | 20               | 0          | 4         | 23          | 496930    | 496911        |             |                                       |                              |                                         |                               |                                                     |                                            | 1                                               |
| 075_1_22                                                                                                  | 30            | AF145054                 | Streptococcus thermophilus bacteriophage 7201, comp     | 44        | 93         | 30               | 2          | 1         | 30          | 27485     | 27514         | 1           |                                       |                              |                                         |                               |                                                     |                                            |                                                 |
| 075_1_23                                                                                                  | 30            | AF000425                 | Lactococcus lactis subsp. cremoris SK11, complete gen   | 44        | 96         | 26               | 1          | 0         | 3           | 28        | 1669005       | 1669030     |                                       |                              |                                         |                               |                                                     |                                            | 1                                               |
| 075_1_24                                                                                                  | 30            | AF158600                 | Streptococcus thermophilus bacteriophage Sf11, comp     | 52        | 100        | 26               | 0          | 1         | 26          | 20678     | 20653         | 1           |                                       |                              |                                         |                               |                                                     |                                            |                                                 |
| 076_1_05                                                                                                  | 30            |                          |                                                         | 34        | 100        | 17               | 0          | 2         | 18          | 238763    | 238779        |             |                                       |                              |                                         |                               |                                                     |                                            | 1                                               |
| 076_1_07                                                                                                  | 30            |                          |                                                         | 36        | 100        | 18               | 0          | 6         | 23          | 1634933   | 1634950       |             |                                       |                              |                                         |                               |                                                     |                                            | 1                                               |
| 076_1_08                                                                                                  | 30            | AF115103                 | Streptococcus thermophilus bacteriophage Sf21, comp     | 52        | 97         | 30               | 1          | 0         | 1           | 30        | 5763          | 5792        | 1                                     |                              |                                         |                               |                                                     |                                            |                                                 |
| 076_1_09                                                                                                  | 30            | AF085222                 | Streptococcus thermophilus bacteriophage DT1, comp      | 44        | 93         | 30               | 2          | 1         | 30          | 32610     | 32639         | 1           |                                       |                              |                                         |                               |                                                     |                                            |                                                 |
| 076_1_16                                                                                                  | 31            |                          |                                                         | 36        | 100        | 18               | 0          | 9         | 26          | 89581     | 89598         |             |                                       |                              |                                         |                               |                                                     |                                            | 1                                               |
| 076_1_17                                                                                                  | 30            | AF115103                 | Streptococcus thermophilus bacteriophage Sf21, comp     | 56        | 100        | 28               | 0          | 1         | 28          | 18834     | 18861         | 1           |                                       |                              |                                         |                               |                                                     |                                            |                                                 |
| 077_1_01                                                                                                  | 30            | AF145054                 | Streptococcus thermophilus bacteriophage 7201, comp     | 52        | 97         | 30               | 1          | 0         | 1           | 30        | 4984          | 5013        | 1                                     |                              |                                         |                               |                                                     |                                            |                                                 |
| 077_1_02                                                                                                  | 30            |                          |                                                         | 38        | 100        | 19               | 0          | 3         | 21          | 1385117   | 1385135       |             |                                       |                              |                                         |                               |                                                     |                                            | 1                                               |
| 077_1_03                                                                                                  | 30            |                          |                                                         | 38        | 100        | 19               | 0          | 1         | 19          | 922       | 904           |             |                                       |                              |                                         |                               |                                                     |                                            | 1                                               |
| 077_1_04                                                                                                  | 30            |                          |                                                         | 36        | 100        | 18               | 0          | 10        | 27          | 1943380   | 1943397       |             |                                       |                              |                                         |                               |                                                     |                                            | 1                                               |
| 077_1_05                                                                                                  | 30            |                          |                                                         | 34        | 95         | 21               | 1          | 0         | 7           | 1175      | 1155          |             |                                       |                              |                                         |                               |                                                     |                                            | 1                                               |
| 077_1_06                                                                                                  | 30            |                          |                                                         | 34        | 100        | 17               | 0          | 13        | 29          | 314810    | 314826        |             |                                       |                              |                                         |                               |                                                     |                                            | 1                                               |
| 077_1_07                                                                                                  | 30            |                          |                                                         | 34        | 95         | 21               | 1          | 0         | 6           | 26        | 176369        | 176349      |                                       |                              |                                         |                               |                                                     |                                            | 1                                               |
| 077_1_08                                                                                                  | 30            |                          |                                                         | 36        | 92         | 26               | 2          | 0         | 3           | 28        | 4008          | 3983        |                                       |                              |                                         |                               |                                                     |                                            | 1                                               |
| 077_1_09                                                                                                  | 30            |                          |                                                         | 34        | 100        | 17               | 0          | 14        | 30          | 13201     | 13217         |             |                                       |                              |                                         |                               |                                                     |                                            | 1                                               |
| 077_1_10                                                                                                  | 31            |                          |                                                         | 38        | 100        | 19               | 0          | 13        | 31          | 1330501   | 1330483       |             |                                       |                              |                                         |                               |                                                     |                                            | 1                                               |
| 077_1_11                                                                                                  | 30            |                          |                                                         | 34        | 100        | 17               | 0          | 7         | 23          | 929       | 913           |             |                                       |                              |                                         |                               |                                                     |                                            | 1                                               |
| 077_1_12                                                                                                  | 30            | AF145054                 | Streptococcus thermophilus bacteriophage 7201, comp     | 52        | 97         | 30               | 1          | 0         | 1           | 30        | 34226         | 34255       | 1                                     |                              |                                         |                               |                                                     |                                            |                                                 |
| 077_1_13                                                                                                  | 30            | AF158600                 | Streptococcus thermophilus bacteriophage Sf11, comp     | 60        | 100        | 30               | 0          | 1         | 30          | 25511     | 25482         | 1           |                                       |                              |                                         |                               |                                                     |                                            |                                                 |
| 077_1_14                                                                                                  | 30            | AF158600                 | Streptococcus thermophilus bacteriophage Sf11, comp     | 44        | 93         | 30               | 2          | 1         | 30          | 39014     | 38985         | 1           |                                       |                              |                                         |                               |                                                     |                                            |                                                 |
| 077_1_15                                                                                                  | 30            | AF145054                 | Streptococcus thermophilus bacteriophage 7201, comp     | 52        | 100        | 26               | 0          | 1         | 26          | 4120      | 4095          | 1           |                                       |                              |                                         |                               |                                                     |                                            |                                                 |
| 077_1_16                                                                                                  | 29            |                          |                                                         | 36        | 100        | 18               | 0          | 4         | 21          | 329       | 346           |             |                                       |                              |                                         |                               |                                                     |                                            | 1                                               |
| 077_1_17                                                                                                  | 30            | AY699705                 | Streptococcus thermophilus bacteriophage 2972, comp     | 44        | 93         | 30               | 2          | 1         | 30          | 27106     | 27135         | 1           |                                       |                              |                                         |                               |                                                     |                                            |                                                 |
| 077_1_26                                                                                                  | 29            |                          |                                                         | 34        | 100        | 17               | 0          | 9         | 25          | 1387176   | 1387160       |             |                                       |                              |                                         |                               |                                                     |                                            | 1                                               |
| 077_2_02                                                                                                  | 35            |                          |                                                         | 36        | 100        | 18               | 0          | 6         | 23          | 768026    | 768008        |             |                                       |                              |                                         |                               |                                                     |                                            | 1                                               |
| 077_2_03                                                                                                  | 38            |                          |                                                         | 36        | 95         | 22               | 1          | 0         | 22          | 1351817   | 1351838       |             |                                       |                              |                                         |                               |                                                     |                                            | 1                                               |
| 078_1_01                                                                                                  | 30            | AF020798                 | Streptococcus thermophilus bacteriophage lysogeny mc    | 60        | 100        | 30               | 0          | 1         | 30          | 5606      | 5577          | 1           |                                       |                              |                                         |                               |                                                     |                                            |                                                 |
| 078_1_02                                                                                                  | 30            | AF085222                 | Streptococcus thermophilus bacteriophage DT1, comp      | 46        | 100        | 23               | 0          | 8         | 30          | 20830     | 20852         | 1           |                                       |                              |                                         |                               |                                                     |                                            |                                                 |
| 078_1_03                                                                                                  | 30            | AF115102                 | Streptococcus thermophilus bacteriophage Sf19, comp     | 60        | 100        | 30               | 0          | 1         | 30          | 8318      | 8347          | 1           |                                       |                              |                                         |                               |                                                     |                                            |                                                 |
| 078_1_04                                                                                                  | 30            |                          |                                                         | 32        | 100        | 16               | 0          | 13        | 28          | 656       | 671           |             |                                       |                              |                                         |                               |                                                     |                                            | 1                                               |
| 080_1_01                                                                                                  | 30            | AJ242475                 | Streptococcus thermophilus repA gene for replication p  | 60        | 100        | 30               | 0          | 1         | 30          | 2257      | 2228          |             |                                       |                              | 1                                       |                               |                                                     |                                            |                                                 |
| 080_1_02                                                                                                  | 30            |                          |                                                         | 34        | 100        | 17               | 0          | 8         | 24          | 1737565   | 1737549       |             |                                       |                              |                                         |                               |                                                     |                                            | 1                                               |
| 080_1_03                                                                                                  | 31            |                          |                                                         | 36        | 100        | 18               | 0          | 2         | 19          | 20227     | 20210         |             |                                       |                              |                                         |                               |                                                     |                                            | 1                                               |
| 080_1_04                                                                                                  | 30            | AF115103                 | Streptococcus thermophilus bacteriophage Sf21, comp     | 50        | 100        | 25               | 0          | 1         | 25          | 18834     | 18858         | 1           |                                       |                              |                                         |                               |                                                     |                                            |                                                 |
| 080_1_05                                                                                                  | 30            |                          |                                                         | 36        | 90         | 30               | 3          | 0         | 1           | 30        | 1546          | 1575        |                                       |                              |                                         |                               |                                                     |                                            | 1                                               |
| 080_1_06                                                                                                  | 30            | AF115103                 | Streptococcus thermophilus bacteriophage Sf21, comp     | 52        | 97         | 30               | 1          | 0         | 1           | 30        | 2966          | 2937        | 1                                     |                              |                                         |                               |                                                     |                                            |                                                 |
| 080_1_07                                                                                                  | 30            | CP000728                 | Clostridium botulinum F str. Langeland, complete gene   | 42        | 100        | 21               | 0          | 8         | 28          | 1525168   | 1525188       |             |                                       |                              |                                         |                               |                                                     |                                            | 1                                               |
| 080_1_08                                                                                                  | 30            | AF145054                 | Streptococcus thermophilus bacteriophage 7201, comp     | 54        | 100        | 27               | 0          | 1         | 27          | 13430     | 13456         | 1           |                                       |                              |                                         |                               |                                                     |                                            |                                                 |
| 080_1_09                                                                                                  | 29            |                          |                                                         | 38        | 100        | 19               | 0          | 3         | 21          | 360185    | 360203        |             |                                       |                              |                                         |                               |                                                     |                                            | 1                                               |
| 080_1_10                                                                                                  | 30            | AJ242479                 | Streptococcus thermophilus res. gene, ORF2 and ORF3     | 60        | 100        | 30               | 0          | 1         | 30          | 3324      | 3295          |             |                                       |                              | 1                                       |                               |                                                     |                                            |                                                 |
| 080_1_11                                                                                                  | 31            | AF085222                 | Streptococcus thermophilus bacteriophage DT1, comp      | 62        | 100        | 31               | 0          | 1         | 31          | 6588      | 6558          | 1           |                                       |                              |                                         |                               |                                                     |                                            |                                                 |
| 080_1_12                                                                                                  | 30            |                          |                                                         | 36        | 100        | 18               | 0          | 13        | 30          | 2504008   | 2504025       |             |                                       |                              |                                         |                               |                                                     |                                            | 1                                               |
| 080_1_13                                                                                                  | 30            |                          |                                                         | 38        | 96         | 23               | 1          | 0         | 1           | 23        | 2014          | 1992        |                                       |                              |                                         |                               |                                                     |                                            | 1                                               |
| 080_1_14                                                                                                  | 29            | AF115103                 | Streptococcus thermophilus bacteriophage Sf21, comp     | 42        | 100        | 21               | 0          | 1         | 21          | 18613     | 18593         | 1           |                                       |                              |                                         |                               |                                                     |                                            |                                                 |
| 080_1_15                                                                                                  | 30            |                          |                                                         | 32        | 95         | 20               | 1          | 0         | 5           | 24        | 2090186       | 2090167     |                                       |                              |                                         |                               |                                                     |                                            | 1                                               |
| 080_1_16                                                                                                  | 30            |                          |                                                         | 36        | 100        | 18               | 0          | 11        | 28          | 735733    | 735716        |             |                                       |                              |                                         |                               |                                                     |                                            | 1                                               |
| 081_1_01                                                                                                  | 29            | AF145054                 | Streptococcus thermophilus bacteriophage 7201, comp     | 54        | 100        | 27               | 0          | 1         | 27          | 31160     | 31134         | 1           |                                       |                              |                                         |                               |                                                     |                                            |                                                 |
| 081_1_02                                                                                                  | 30            |                          |                                                         | 34        | 100        | 17               | 0          | 1         | 17          | 815377    | 815393        |             |                                       |                              |                                         |                               |                                                     |                                            | 1                                               |
| 081_1_03                                                                                                  | 30            | AF115103                 | Streptococcus thermophilus bacteriophage Sf21, comp     | 44        | 93         | 30               | 2          | 1         | 30          | 36562     | 36591         | 1           |                                       |                              |                                         |                               |                                                     |                                            |                                                 |
| 081_1_04                                                                                                  | 30            |                          |                                                         | 38        | 93         | 27               | 2          | 1         | 27          | 12216     | 12190         |             |                                       |                              |                                         |                               |                                                     |                                            | 1                                               |
| 081_1_06                                                                                                  | 30            | AF145054                 | Streptococcus thermophilus bacteriophage 7201, comp     | 48        | 96         | 28               | 1          | 0         | 1           | 28        | 34234         | 34207       | 1                                     |                              |                                         |                               |                                                     |                                            |                                                 |
| 081_1_07                                                                                                  | 30            | AY699705                 | Streptococcus thermophilus bacteriophage 2972, comp     | 48        | 96         | 28               | 1          | 0         | 3           | 25862     | 25835         | 1           |                                       |                              |                                         |                               |                                                     |                                            |                                                 |
| 081_1_08                                                                                                  | 30            |                          |                                                         | 34        | 100        | 17               | 0          | 13        | 29          | 249615    | 249599        |             |                                       |                              |                                         |                               |                                                     |                                            | 1                                               |
| 081_1_09                                                                                                  | 30            | AF348738                 | Streptococcus thermophilus bacteriophage DT4 host sp    | 52        | 100        | 26               | 0          | 5         | 30          | 2119      | 2144          | 1           |                                       |                              |                                         |                               |                                                     |                                            |                                                 |
| 081_1_10                                                                                                  | 30            |                          |                                                         | 36        | 100        | 18               | 0          | 13        | 30          | 738202    | 738219        |             |                                       |                              |                                         |                               |                                                     |                                            | 1                                               |
| 081_1_11                                                                                                  | 30            |                          |                                                         | 34        | 100        | 17               | 0          | 8         | 24          | 1306      |               |             |                                       |                              |                                         |                               |                                                     |                                            |                                                 |

| spacer identification (strain reference in Fig. 5, CRISPR locus, and spacer position from the leader end) | spacer sequence                 | spacer length | subject accession number | subject definition                                              | bit score | % identity | alignment length | mismatches | gap opens | query start | query end | subject start | subject end | BLAST hit with S. thermophilus phages | BLAST hit with other viruses | BLAST hit with S. thermophilus plasmids | BLAST hit with other plasmids | BLAST hit with S. thermophilus chromosomal sequence | BLAST hit with other chromosomal sequences | No significant BLAST hit (bit score below 40.1) |   |
|-----------------------------------------------------------------------------------------------------------|---------------------------------|---------------|--------------------------|-----------------------------------------------------------------|-----------|------------|------------------|------------|-----------|-------------|-----------|---------------|-------------|---------------------------------------|------------------------------|-----------------------------------------|-------------------------------|-----------------------------------------------------|--------------------------------------------|-------------------------------------------------|---|
| 088_1_06                                                                                                  | TCTCATCTTTGGATTGCTCTCCAAAGT     | 30            |                          |                                                                 | 34        | 100        | 17               | 0          | 0         | 5           | 21        | 701871        | 701887      |                                       |                              |                                         |                               |                                                     |                                            |                                                 |   |
| 088_1_07                                                                                                  | CAGCTTACATTAAGTACAGCTCGACGATCG  | 30            | AF085222                 | Streptococcus thermophilus bacteriophage DT1, complete genome   | 60        | 100        | 30               | 0          | 1         | 30          | 6293      | 6322          | 1           |                                       |                              |                                         |                               |                                                     |                                            |                                                 |   |
| 088_1_08                                                                                                  | TCCTACCACACTATTGAAACATGATATCAT  | 30            |                          |                                                                 | 34        | 100        | 17               | 0          | 0         | 6           | 22        | 583409        | 583425      |                                       |                              |                                         |                               |                                                     |                                            | 1                                               |   |
| 088_1_09                                                                                                  | CTTTCCTTATTAAAGCCCTATATCACCTTTA | 30            | AF145054                 | Streptococcus thermophilus bacteriophage 7201, complete genome  | 60        | 100        | 30               | 0          | 1         | 30          | 9670      | 9641          | 1           |                                       |                              |                                         |                               |                                                     |                                            |                                                 |   |
| 088_1_10                                                                                                  | CGAATCTTAAATCAAGTGGCAAGCGGTATTG | 30            | AF115102                 | Streptococcus thermophilus bacteriophage SF19, complete genome  | 52        | 97         | 30               | 1          | 0         | 1           | 30        | 5513          | 5542        | 1                                     |                              |                                         |                               |                                                     |                                            |                                                 |   |
| 088_1_11                                                                                                  | AGTAAATAGCCCTCAGATATATAGACCC    | 30            | DQ295022                 | Streptococcus thermophilus plasmid pSMO-316, complete genome    | 60        | 100        | 30               | 0          | 1         | 30          | 1592      | 1563          |             |                                       | 1                            |                                         |                               |                                                     |                                            |                                                 |   |
| 088_1_23                                                                                                  | GAAAGTGTCTTTTGAAGCATGTCAATGATA  | 30            | AF085222                 | Streptococcus thermophilus bacteriophage DT1, complete genome   | 60        | 100        | 30               | 0          | 1         | 30          | 23603     | 23574         | 1           |                                       |                              |                                         |                               |                                                     |                                            |                                                 |   |
| 088_1_24                                                                                                  | CAGCGAACCTAGCTAAATCAACAAGTGTCTG | 30            |                          |                                                                 | 36        | 100        | 18               | 0          | 13        | 30          | 151741    | 151724        |             |                                       |                              |                                         |                               |                                                     |                                            | 1                                               |   |
| 088_1_25                                                                                                  | AGCTTTGAATATTTACAGCTGTATACCAA   | 30            |                          |                                                                 | 34        | 100        | 17               | 0          | 0         | 7           | 23        | 225801        | 225785      |                                       |                              |                                         |                               |                                                     |                                            | 1                                               |   |
| 088_1_26                                                                                                  | TCGTCCTATGATTTTACCGATGAAGTACG   | 30            | AJ239049                 | Streptococcus thermophilus partial repA gene, ORF1 to ORF10     | 52        | 100        | 26               | 0          | 1         | 26          | 4573      | 4596          |             |                                       |                              | 1                                       |                               |                                                     |                                            |                                                 |   |
| 088_1_27                                                                                                  | CAACCATACGCAACCACTGCGATGTCTCAT  | 30            |                          |                                                                 | 36        | 100        | 17               | 0          | 3         | 19          | 304844    | 304860        |             |                                       |                              |                                         |                               |                                                     |                                            | 1                                               |   |
| 088_1_28                                                                                                  | ATTGACTAAACAGCTGTATAGTCTCGG     | 30            |                          |                                                                 | 36        | 90         | 30               | 3          | 0         | 1           | 30        | 37751         | 37722       |                                       |                              |                                         |                               |                                                     |                                            | 1                                               |   |
| 088_1_29                                                                                                  | ACGTTAGAGTTTATGTAAGCAACTTAT     | 30            |                          |                                                                 | 34        | 100        | 17               | 0          | 14        | 30          | 1197113   | 1197129       |             |                                       |                              |                                         |                               |                                                     |                                            | 1                                               |   |
| 088_1_30                                                                                                  | TTTTCAATATAGATAAACATAACTGACT    | 30            |                          |                                                                 | 36        | 100        | 18               | 0          | 1         | 18          | 776559    | 776576        |             |                                       |                              |                                         |                               |                                                     |                                            | 1                                               |   |
| 088_1_31                                                                                                  | TAATTCGACATAAGCACTACTATTATAT    | 30            | AF115103                 | Streptococcus thermophilus bacteriophage Sf121, complete genome | 52        | 97         | 30               | 1          | 0         | 1           | 30        | 18614         | 18585       | 1                                     |                              |                                         |                               |                                                     |                                            |                                                 |   |
| 088_1_33                                                                                                  | TGGTAACTCTTAGGTAAATCTCAGCTATTG  | 30            | AF145054                 | Streptococcus thermophilus bacteriophage 7201, complete genome  | 44        | 96         | 26               | 1          | 0         | 5           | 30        | 15024         | 14999       | 1                                     |                              |                                         |                               |                                                     |                                            |                                                 |   |
| 088_1_34                                                                                                  | ATGATTAGTTAGTTCCTGGGAAATCT      | 30            | CP000393                 | Trichodesmium erythraeum IMS101, complete genome                | 42        | 100        | 21               | 0          | 1         | 21          | 3503898   | 3503878       |             |                                       |                              |                                         |                               |                                                     |                                            | 1                                               |   |
| 088_1_35                                                                                                  | TCAAGATAAACTACTTAAAGGCTGTGTA    | 30            |                          |                                                                 | 38        | 100        | 19               | 0          | 4         | 22          | 3736      | 3718          |             |                                       |                              |                                         |                               |                                                     |                                            | 1                                               |   |
| 088_1_36                                                                                                  | AAATGAAGATATTTCCAAACCTCTGCTC    | 30            | AJ242479                 | Streptococcus thermophilus res gene, ORF2 and ORF3              | 60        | 100        | 30               | 0          | 1         | 30          | 2260      | 2231          |             |                                       |                              | 1                                       |                               |                                                     |                                            |                                                 |   |
| 088_1_37                                                                                                  | AGTGAACGAAAGGTTTTCGTATAGATAG    | 30            |                          |                                                                 | 36        | 100        | 18               | 0          | 2         | 19          | 711770    | 711753        |             |                                       |                              |                                         |                               |                                                     |                                            | 1                                               |   |
| 088_1_38                                                                                                  | AAATTTGATGGTATTAACCTTAAACAGTT   | 30            | AJ239049                 | Streptococcus thermophilus partial repA gene, ORF1 to ORF10     | 60        | 100        | 30               | 0          | 1         | 30          | 2066      | 2037          |             |                                       |                              |                                         | 1                             |                                                     |                                            |                                                 |   |
| 088_1_39                                                                                                  | TTGAATAGTTTAAATGAACCAAGCTATAC   | 30            | U88974                   | Streptococcus thermophilus temperate bacteriophage C            | 60        | 100        | 30               | 0          | 1         | 30          | 42508     | 42537         |             |                                       | 1                            |                                         |                               |                                                     |                                            |                                                 |   |
| 088_1_40                                                                                                  | AAGTAGTACCGCTGGATGGATTAAGAAGC   | 30            |                          |                                                                 | 36        | 100        | 18               | 0          | 1         | 18          | 2616976   | 2616993       |             |                                       |                              |                                         |                               |                                                     |                                            | 1                                               |   |
| 088_1_41                                                                                                  | GGTATCTCCCAAGTGTTCCTGGGAT       | 30            |                          |                                                                 | 38        | 100        | 19               | 0          | 2         | 20          | 1045      | 1063          |             |                                       |                              |                                         |                               |                                                     |                                            | 1                                               |   |
| 088_1_42                                                                                                  | AATGTGCTTAACTTCTGATTCGGCGTTC    | 30            | AF145054                 | Streptococcus thermophilus bacteriophage 7201, complete genome  | 46        | 100        | 23               | 0          | 1         | 23          | 7437      | 7415          | 1           |                                       |                              |                                         |                               |                                                     |                                            |                                                 |   |
| 088_1_43                                                                                                  | TGCTTCGCTTAAAGTGTGATTCGCAATGC   | 30            | AY699705                 | Streptococcus thermophilus bacteriophage 2972, complete genome  | 52        | 97         | 30               | 1          | 0         | 1           | 30        | 10092         | 10063       | 1                                     |                              |                                         |                               |                                                     |                                            |                                                 |   |
| 088_3_01                                                                                                  | TGTAAAGCAGCTACACCGTGAACCTTACGA  | 30            | AF348736                 | Streptococcus thermophilus bacteriophage MD2 putative           | 60        | 100        | 30               | 0          | 1         | 30          | 3966      | 3995          |             |                                       |                              |                                         |                               |                                                     |                                            |                                                 | 1 |
| 088_3_02                                                                                                  | ACGAGCTTTGCTTGAAGCTTTCGCAATA    | 30            |                          |                                                                 | 32        | 100        | 16               | 0          | 1         | 16          | 1090      | 1073          |             |                                       |                              |                                         |                               |                                                     |                                            | 1                                               |   |
| 088_3_03                                                                                                  | ATTAAAGATAAGAGGAGCAAGCATAAA     | 30            | BA000016                 | Clostridium perfringens str. 13 DNA, complete genome            | 40        | 100        | 20               | 0          | 4         | 23          | 1312861   | 1312680       |             |                                       |                              |                                         |                               |                                                     |                                            | 1                                               |   |
| 088_3_04                                                                                                  | ATAGTACTGTAAGGCTCTTAATGGCTCA    | 30            |                          |                                                                 | 36        | 95         | 22               | 1          | 0         | 22          | 1735036   | 1735015       |             |                                       |                              |                                         |                               |                                                     |                                            | 1                                               |   |
| 088_3_05                                                                                                  | TGTAATTAAGAAGAAACAGAAACAAAAT    | 30            | AP009179                 | Sulfurovum sp. NBC37-1 genomic DNA, complete genome             | 40        | 100        | 20               | 0          | 8         | 27          | 457898    | 457879        |             |                                       |                              |                                         |                               |                                                     |                                            | 1                                               |   |
| 088_3_06                                                                                                  | AGATACATATAGCAGACATACACATAATGAT | 31            |                          |                                                                 | 36        | 95         | 22               | 1          | 0         | 22          | 111805    | 111784        |             |                                       |                              |                                         |                               |                                                     |                                            | 1                                               |   |
| 088_3_07                                                                                                  | TTGATCCGGTACTACCTTTCCTGCGT      | 30            |                          |                                                                 | 38        | 90         | 19               | 0          | 2         | 20          | 2279284   | 2279266       |             |                                       |                              |                                         |                               |                                                     |                                            | 1                                               |   |
| 088_3_08                                                                                                  | TAGAGGTAATGATGGAATTCGAGTAAGGA   | 30            |                          |                                                                 | 38        | 96         | 23               | 1          | 0         | 5           | 27        | 29776         | 29798       |                                       |                              |                                         |                               |                                                     |                                            | 1                                               |   |
| 088_3_09                                                                                                  | TGAATCTTCAACTTTACTCAGCTGATAC    | 30            |                          |                                                                 | 36        | 90         | 30               | 3          | 0         | 1           | 30        | 867           | 896         |                                       |                              |                                         |                               |                                                     |                                            | 1                                               |   |
| 088_3_10                                                                                                  | CGAAGCTGTGATGAATGCTACTGACTGTT   | 30            | AF442520                 | Streptococcus thermophilus bacteriophage k3 putative            | 54        | 100        | 27               | 0          | 4         | 30          | 1103      | 1129          | 1           |                                       |                              |                                         |                               |                                                     |                                            |                                                 |   |
| 088_3_11                                                                                                  | GAGCAAAAGGGGGTATTCGGTAAAGT      | 30            | AJ242475                 | Streptococcus thermophilus repA gene for replication p          | 48        | 100        | 24               | 0          | 5         | 28          | 2634      | 2611          |             |                                       |                              | 1                                       |                               |                                                     |                                            |                                                 |   |
| 088_3_12                                                                                                  | CGAATTTCTGCTTATTTTCTGATATCA     | 30            |                          |                                                                 | 36        | 100        | 18               | 0          | 11        | 28          | 217       | 200           |             |                                       |                              |                                         |                               |                                                     |                                            | 1                                               |   |
| 088_3_13                                                                                                  | TTACACATTTTCAAGTATTTTAAAAATTC   | 30            | AF323669                 | Bacteriophage bil286, complete genome                           | 50        | 100        | 25               | 0          | 1         | 25          | 35984     | 36008         |             |                                       | 1                            |                                         |                               |                                                     |                                            |                                                 |   |
| 088_3_14                                                                                                  | GAAACAGAACTTATGAAGTCGAAAACCGA   | 30            |                          |                                                                 | 36        | 100        | 18               | 0          | 2         | 19          | 1583354   | 1583337       |             |                                       |                              |                                         |                               |                                                     |                                            | 1                                               |   |
| 088_3_15                                                                                                  | CAACCCAGACATGAATGCTATTAGATATG   | 30            | AY699705                 | Streptococcus thermophilus bacteriophage 2972, complete genome  | 42        | 100        | 21               | 0          | 2         | 22          | 21347     | 21367         | 1           |                                       |                              |                                         |                               |                                                     |                                            |                                                 |   |
| 089_1_01                                                                                                  | TTTTTAAATCCGCTGATGCTATATAT      | 30            | DQ417610                 | Streptococcus thermophilus plasmid p139 crRNA region            | 60        | 100        | 30               | 0          | 1         | 30          | 257       | 222           |             |                                       |                              |                                         |                               |                                                     |                                            | 1                                               |   |
| 089_1_02                                                                                                  | AATCCAACTTTTCAATAAATCCCTCCA     | 30            |                          |                                                                 | 36        | 100        | 18               | 0          | 8         | 25          | 2417782   | 2417799       |             |                                       |                              |                                         |                               |                                                     |                                            | 1                                               |   |
| 089_1_03                                                                                                  | CATGCTTCACTGCTGCTGACATGAT       | 30            |                          |                                                                 | 36        | 90         | 30               | 0          | 1         | 30          | 25019     | 2499          |             |                                       |                              |                                         |                               |                                                     |                                            | 1                                               |   |
| 089_1_04                                                                                                  | TGGAAGGGGTGTCTAGTGAAGAAATGTCG   | 30            | AJ239049                 | Streptococcus thermophilus partial repA gene, ORF1 to ORF10     | 60        | 100        | 30               | 0          | 1         | 30          | 4847      | 4876          |             |                                       |                              |                                         |                               |                                                     |                                            | 1                                               |   |
| 089_1_05                                                                                                  | CTCGAAGCGCTTCAATGCCCTATCTTCTTC  | 30            | AF145054                 | Streptococcus thermophilus bacteriophage 7201, complete genome  | 46        | 100        | 23               | 0          | 8         | 30          | 9013      | 8991          | 1           |                                       |                              |                                         |                               |                                                     |                                            |                                                 |   |
| 089_1_06                                                                                                  | ATGCTTAAGTATCCACTCGTGAATACAT    | 29            |                          |                                                                 | 36        | 100        | 18               | 0          | 9         | 26          | 1855869   | 1855852       |             |                                       |                              |                                         |                               |                                                     |                                            | 1                                               |   |
| 089_1_07                                                                                                  | ATTTAATGAATAATTCATCAACCGCAGT    | 30            | AF145054                 | Streptococcus thermophilus bacteriophage 7201, complete genome  | 60        | 100        | 30               | 0          | 1         | 30          | 31597     | 31626         | 1           |                                       |                              |                                         |                               |                                                     |                                            |                                                 |   |
| 089_1_08                                                                                                  | TAGAGGTTATATCTGATGGAATCGATG     | 30            |                          |                                                                 | 36        | 100        | 18               | 0          | 13        | 30          | 1684364   | 1684381       |             |                                       |                              |                                         |                               |                                                     |                                            | 1                                               |   |
| 089_1_09                                                                                                  | TGGCGAATAGAGAGCCAAATGGCAAGCAAG  | 30            |                          |                                                                 | 32        | 100        | 16               | 0          | 15        | 30          | 1248870   | 1248855       |             |                                       |                              |                                         |                               |                                                     |                                            | 1                                               |   |
| 089_1_10                                                                                                  | AGAGACCAATAAATCTGAGAAAAGCAAG    | 30            |                          |                                                                 | 36        | 95         | 22               | 1          | 0         | 9           | 891884    | 891863        |             |                                       |                              |                                         |                               |                                                     |                                            | 1                                               |   |
| 089_1_11                                                                                                  | AAATGGCTGTTAATGTTAATGTCGAAAGC   | 30            | AF115103                 | Streptococcus thermophilus bacteriophage Sf121, complete genome | 60        | 100        | 30               | 0          | 1         | 30          | 23786     | 23815         | 1           |                                       |                              |                                         |                               |                                                     |                                            |                                                 |   |
| 089_1_12                                                                                                  | CAATTTGATCTAAAATCTGTTGACACGTTA  | 30            | AF115103                 | Streptococcus thermophilus bacteriophage Sf121, complete genome | 60        | 100        | 30               | 0          | 1         | 30          | 7239      | 7268          | 1           |                                       |                              |                                         |                               |                                                     |                                            |                                                 |   |
| 089_1_13                                                                                                  | TCTTCGTTATACACGCTTCTACAGCTTG    | 30            | AF085222                 | Streptococcus thermophilus bacteriophage DT1, complete genome   | 44        | 93         | 30               | 2          | 0         | 1           | 30        | 34590         | 34561       | 1                                     |                              |                                         |                               |                                                     |                                            |                                                 |   |
| 089_1_14                                                                                                  | GAATTCCTCAATGAAACCACTTCAAGCAAC  | 30            | AF348744                 | Streptococcus thermophilus bacteriophage DT1.1 host             | 48        | 100        | 24               | 0          | 3         | 26          | 791       | 768           | 1           |                                       |                              |                                         |                               |                                                     |                                            |                                                 |   |
| 089_1_15                                                                                                  | CAAGGCACTCAACCAACCAAAATGACCC    | 28            | CP0000421                | Streptococcus thermophilus LMD-9 plasmid 2, complete genome     | 48        | 96         | 28               | 1          | 0         | 1           | 28        | 1280          | 1253        |                                       |                              |                                         |                               |                                                     |                                            | 1                                               |   |
| 089_1_16                                                                                                  | CTAAATCGTAAATGGTAAAGTTCGACGACT  | 30            | AF115103                 | Streptococcus thermophilus bacteriophage Sf121, complete genome | 52        | 97         | 30               | 1          | 0         | 1           | 30        | 14752         | 14781       | 1                                     |                              |                                         |                               |                                                     |                                            |                                                 |   |
| 091_1_15                                                                                                  | TGCTTGGATGTTGATGCACTGCATATGATA  | 30            |                          |                                                                 | 38        | 93         | 27               | 2          | 4         | 30          | 15642     | 15616         |             |                                       |                              |                                         |                               |                                                     |                                            | 1                                               |   |
| 091_1_16                                                                                                  | AATGACCGGAATGGCTGATCTGCACAT     | 30            | AF442521                 | Streptococcus thermophilus bacteriophage k3 putative            | 60        | 100        | 30               | 0          | 1         | 30          | 634       | 605           | 1           |                                       |                              |                                         |                               |                                                     |                                            |                                                 |   |
| 091_1_17                                                                                                  | TTTCAATATCTCACTTTTCTGCTGCTATTC  | 30            | AF115103                 | Streptococcus thermophilus bacteriophage Sf121, complete genome | 60        | 100        | 30               | 0          | 1         | 30          | 26836     | 26865         | 1           |                                       |                              |                                         |                               |                                                     |                                            |                                                 |   |
| 091_1_18                                                                                                  | TGTGCAAAATTTCACTGCTGACAGAC      | 30            | AY699705                 | Streptococcus thermophilus bacteriophage 2972, complete genome  | 52        | 97         | 30               | 1          | 0         | 1           | 30        | 140           | 111         |                                       |                              |                                         |                               |                                                     |                                            | 1                                               |   |
| 091_1_19                                                                                                  | CACAAATTAATGATGCAATAGCAATGCT    | 30            | U88974                   | Streptococcus thermophilus temperate bacteriophage C            | 42        | 96         | 25               | 1          | 0         | 6           | 30        | 34315         | 34339       |                                       |                              |                                         |                               |                                                     |                                            | 1                                               |   |
| 091_1_20                                                                                                  | AATTCGTGAATAAATCAAAAGCAAAATA    | 30            | EF507512                 | Borrelia lonestari clone pBLS1108 putative NhaC gene            | 44        | 100        | 22               | 0          | 9         | 30          | 536       | 515           |             |                                       |                              |                                         |                               |                                                     |                                            | 1                                               |   |
| 091_1_21                                                                                                  | TAACATTTCTGCACTTTCTTCTTGATGC    | 30            |                          |                                                                 | 36        | 100        | 18               | 0          | 10        | 27          | 34444     | 34461         |             |                                       |                              |                                         |                               |                                                     |                                            | 1                                               |   |
| 091_1_01                                                                                                  | CGAATGCTACCTGAGGATTTTACCTATGGA  | 30            | AF145054                 | Streptococcus thermophilus bacteriophage 7201, complete genome  | 52        | 100        | 26               | 0          | 5         | 30          | 29394     | 29419         | 1           |                                       |                              |                                         |                               |                                                     |                                            |                                                 |   |

| spacer identification (strain reference in Fig. 5, CRISPR locus, and spacer position from the leader end) | spacer sequence                      | spacer length | subject accession number | subject definition                                     | bit score | % identity | alignment length | mismatches | gap opens | query start | subject start | subject end | BLAST hit with S. thermophilus phages | BLAST hit with other viruses | BLAST hit with S. thermophilus plasmids | BLAST hit with other plasmids | BLAST hit with S. thermophilus chromosomal sequence | BLAST hit with other chromosomal sequences | No significant BLAST hit (bit score below 40.1) |   |   |
|-----------------------------------------------------------------------------------------------------------|--------------------------------------|---------------|--------------------------|--------------------------------------------------------|-----------|------------|------------------|------------|-----------|-------------|---------------|-------------|---------------------------------------|------------------------------|-----------------------------------------|-------------------------------|-----------------------------------------------------|--------------------------------------------|-------------------------------------------------|---|---|
| 101_2_03                                                                                                  | TCTTTGTGCCAAAACTCAACAAATTTTCCATTTAA  | 37            | U88974                   | Streptococcus thermophilus temperate bacteriophage C   | 74        | 100        | 37               | 0          | 1         | 37          | 2698          | 2662        |                                       |                              |                                         |                               |                                                     |                                            |                                                 |   |   |
| 101_2_05                                                                                                  | ACCAAAATATCTCACATAAATTCATTAATTTACCTC | 37            |                          |                                                        | 36        | 100        | 18               | 0          | 19        | 36          | 5289          | 5272        |                                       |                              |                                         |                               |                                                     |                                            |                                                 | 1 |   |
| 104_1_01                                                                                                  | ACGTCGTCTAACTGGAAAGTACCTGCTAAT       | 31            |                          |                                                        | 34        | 100        | 17               | 0          | 10        | 26          | 2116044       | 2116028     |                                       |                              |                                         |                               |                                                     |                                            |                                                 | 1 |   |
| 104_1_02                                                                                                  | CTGTTCTCTAATCGAAGGCGCGTGAITGA        | 30            |                          |                                                        | 32        | 95         | 20               | 1          | 7         | 26          | 21008         | 20989       |                                       |                              |                                         |                               |                                                     |                                            |                                                 | 1 |   |
| 104_1_03                                                                                                  | AAACCTCACTAGTCACTTAGTGGGGTAGG        | 30            | AF085222                 | Streptococcus thermophilus bacteriophage DT1, comple   | 60        | 100        | 30               | 0          | 1         | 30          | 24454         | 24483       | 1                                     |                              |                                         |                               |                                                     |                                            |                                                 |   |   |
| 104_1_04                                                                                                  | TATTAAGTTTAGTCCCGATGCTTCTGCTG        | 30            | AJ239049                 | Streptococcus thermophilus partial repA gene, ORF1 to  | 60        | 100        | 30               | 0          | 1         | 30          | 4393          | 4422        |                                       |                              |                                         |                               |                                                     |                                            |                                                 | 1 |   |
| 104_1_05                                                                                                  | AAACCAATAAACATACCGATTTGCTGCCAAT      | 30            | CP000419                 | Streptococcus thermophilus LMD-9, complete genome      | 60        | 100        | 30               | 0          | 1         | 30          | 907457        | 907486      |                                       |                              |                                         |                               |                                                     |                                            |                                                 | 1 |   |
| 104_1_06                                                                                                  | GCAACGTGTAGCCAGGAAAGCATCAAGAA        | 30            | AF158600                 | Streptococcus thermophilus bacteriophage Sf11, comp    | 60        | 100        | 30               | 0          | 1         | 30          | 4914          | 4943        | 1                                     |                              |                                         |                               |                                                     |                                            |                                                 | 1 |   |
| 104_1_07                                                                                                  | AAGAGCAAAAAATAACTCTAGCTCTGCTCG       | 30            |                          |                                                        | 36        | 100        | 18               | 0          | 4         | 21          | 138684        | 138701      |                                       |                              |                                         |                               |                                                     |                                            |                                                 | 1 |   |
| 104_1_08                                                                                                  | AAGAACCCTCTAAGTGGACATTTAATGAT        | 30            | CP000713                 | Psychrobacter sp. PRwf-1, complete genome              | 40        | 96         | 24               | 1          | 5         | 28          | 2322596       | 2322573     |                                       |                              |                                         |                               |                                                     |                                            |                                                 | 1 |   |
| 104_1_09                                                                                                  | ATAATGTTTAAACCTCTTGAACCTCTG          | 29            |                          |                                                        | 38        | 95         | 23               | 1          | 1         | 22          | 1069482       | 1069503     |                                       |                              |                                         |                               |                                                     |                                            |                                                 | 1 |   |
| 104_1_10                                                                                                  | ACGTTGATGAATATTTGTTAAACCTTTA         | 29            | AF115103                 | Streptococcus thermophilus bacteriophage Sf21, comp    | 42        | 93         | 29               | 2          | 0         | 1           | 29            | 20745       | 20773                                 | 1                            |                                         |                               |                                                     |                                            |                                                 |   |   |
| 104_1_11                                                                                                  | CAAGAGTGAACAAAGTACACCGCTGGAAT        | 30            |                          |                                                        | 34        | 100        | 17               | 0          | 14        | 30          | 4670947       | 4670931     |                                       |                              |                                         |                               |                                                     |                                            |                                                 | 1 |   |
| 104_1_12                                                                                                  | GACAGCAAGTACACAGTGTGATGAATG          | 30            | U88974                   | Streptococcus thermophilus temperate bacteriophage C   | 60        | 100        | 30               | 0          | 1         | 30          | 15006         | 15035       |                                       |                              |                                         |                               |                                                     |                                            |                                                 | 1 |   |
| 104_1_13                                                                                                  | TAAAGAACTCAACGAGATTTTAGCGCAACA       | 30            | AF145054                 | Streptococcus thermophilus bacteriophage 7201, comp    | 60        | 100        | 30               | 0          | 1         | 30          | 2988          | 3017        | 1                                     |                              |                                         |                               |                                                     |                                            |                                                 | 1 |   |
| 104_1_14                                                                                                  | TAAACCAATAAATACAGTGAAGCAACAAT        | 30            | AY699705                 | Streptococcus thermophilus bacteriophage 2972, comp    | 60        | 100        | 26               | 0          | 5         | 30          | 15555         | 15580       | 1                                     |                              |                                         |                               |                                                     |                                            |                                                 | 1 |   |
| 104_1_15                                                                                                  | CAGGCGTAAGGTATGCTAATATATAACGAT       | 29            | AY312234                 | Streptococcus thermophilus plasmid pSMQ308, comple     | 50        | 97         | 29               | 1          | 0         | 1           | 29            | 2813        | 2841                                  |                              |                                         |                               |                                                     |                                            |                                                 |   | 1 |
| 104_1_16                                                                                                  | GCTATCGAATAAAGCTTACAGCAACTCA         | 30            |                          |                                                        | 36        | 100        | 18               | 0          | 11        | 28          | 26000         | 25983       |                                       |                              |                                         |                               |                                                     |                                            |                                                 | 1 |   |
| 104_1_17                                                                                                  | GTGGAATATTAAGCCCAAGATTTGTGACGCA      | 30            |                          |                                                        | 34        | 100        | 17               | 0          | 5         | 21          | 10094         | 10078       |                                       |                              |                                         |                               |                                                     |                                            |                                                 | 1 |   |
| 104_1_18                                                                                                  | TATTGCAATATTGCGTTGGGAAACCTTC         | 30            |                          |                                                        | 34        | 100        | 17               | 0          | 7         | 23          | 501           | 485         |                                       |                              |                                         |                               |                                                     |                                            |                                                 | 1 |   |
| 104_1_19                                                                                                  | CGTCTGTCTAATCGAAAGTACCGGCTAAT        | 30            |                          |                                                        | 32        | 100        | 16               | 0          | 11        | 26          | 1040221       | 1040236     |                                       |                              |                                         |                               |                                                     |                                            |                                                 | 1 |   |
| 104_1_20                                                                                                  | AAAGAGATGACCCATCCATTAACAGCT          | 30            |                          |                                                        | 34        | 92         | 25               | 2          | 5         | 29          | 1990486       | 1990462     |                                       |                              |                                         |                               |                                                     |                                            |                                                 | 1 |   |
| 104_1_21                                                                                                  | GGGAGTGTATTCTTACATCAAAACAATG         | 30            |                          |                                                        | 34        | 100        | 17               | 0          | 7         | 23          | 18807         | 18823       |                                       |                              |                                         |                               |                                                     |                                            |                                                 | 1 |   |
| 104_1_22                                                                                                  | CATCAAGTTGAAAAGGACTACAAAGCGCC        | 30            |                          |                                                        | 36        | 100        | 18               | 0          | 8         | 25          | 2521302       | 2521319     |                                       |                              |                                         |                               |                                                     |                                            |                                                 | 1 |   |
| 104_1_23                                                                                                  | CTTAATTTAGAGCGTGGGATCTTGAATAT        | 30            | AY682165                 | Lactobacillus plantarum bacteriophage LP65, complete   | 40        | 100        | 20               | 0          | 2         | 21          | 7721          | 7702        |                                       |                              |                                         |                               |                                                     |                                            |                                                 | 1 |   |
| 104_1_24                                                                                                  | ATATCCGATGGCAGCATCTGAAACTGGCTG       | 30            |                          |                                                        | 34        | 100        | 17               | 0          | 9         | 25          | 300033        | 300049      |                                       |                              |                                         |                               |                                                     |                                            |                                                 | 1 |   |
| 105_1_01                                                                                                  | ACGTCGTCTAAGTGGAAAGTACCTGTTAAT       | 31            |                          |                                                        | 34        | 100        | 17               | 0          | 10        | 28          | 2116044       | 2116028     |                                       |                              |                                         |                               |                                                     |                                            |                                                 | 1 |   |
| 106_1_01                                                                                                  | TAAAGCAAGCTCTGCTGCTGCTCTCTA          | 30            | AY312234                 | Streptococcus thermophilus plasmid pSMQ308, comple     | 60        | 100        | 30               | 0          | 1         | 30          | 5924          | 5985        |                                       |                              |                                         |                               |                                                     |                                            |                                                 | 1 |   |
| 106_1_02                                                                                                  | AATAGAAGGCTAAGTATGATGAAGGATA         | 30            |                          |                                                        | 62        | 100        | 16               | 0          | 10        | 25          | 4773          | 4788        |                                       |                              |                                         |                               |                                                     |                                            |                                                 | 1 |   |
| 106_1_03                                                                                                  | CTATCTACAGTCCACCATGACCTTATCT         | 30            | AY699705                 | Streptococcus thermophilus bacteriophage 2972, comp    | 60        | 100        | 30               | 0          | 1         | 30          | 6494          | 6465        | 1                                     |                              |                                         |                               |                                                     |                                            |                                                 | 1 |   |
| 106_1_04                                                                                                  | ATAAATGGCTGAGGATGCCCTAAAGGGA         | 30            |                          |                                                        | 60        | 100        | 16               | 0          | 4         | 19          | 1198112       | 1198127     |                                       |                              |                                         |                               |                                                     |                                            |                                                 | 1 |   |
| 106_1_05                                                                                                  | ATAGCTTCCAAACCTTATCTGGCTCATCT        | 30            |                          |                                                        | 38        | 100        | 19               | 0          | 1         | 19          | 5290          | 5272        |                                       |                              |                                         |                               |                                                     |                                            |                                                 | 1 |   |
| 106_1_06                                                                                                  | CAGATGTGCTCAAAAATACCAAGATGAT         | 29            | AF115103                 | Streptococcus thermophilus bacteriophage Sf21, comp    | 50        | 97         | 29               | 1          | 0         | 1           | 29            | 610         | 638                                   | 1                            |                                         |                               |                                                     |                                            |                                                 | 1 |   |
| 106_1_07                                                                                                  | CTTAGATGAGGTTTCCCAACGGAAACATG        | 30            |                          |                                                        | 36        | 90         | 30               | 3          | 0         | 1           | 30            | 2027        | 2056                                  |                              |                                         |                               |                                                     |                                            |                                                 | 1 |   |
| 106_1_08                                                                                                  | TATCCTCTGTTGATAAATGCTTAATCT          | 30            |                          |                                                        | 36        | 100        | 18               | 0          | 7         | 24          | 199910        | 199927      |                                       |                              |                                         |                               |                                                     |                                            |                                                 | 1 |   |
| 106_1_09                                                                                                  | TTGATAGCAAAACACTTCTGTGAGCAGC         | 30            |                          |                                                        | 36        | 100        | 18               | 0          | 2         | 19          | 5358          | 5375        |                                       |                              |                                         |                               |                                                     |                                            |                                                 | 1 |   |
| 106_1_10                                                                                                  | TGCTTCTCAAAAGAGCTATGCTTGTTA          | 30            | U88974                   | Streptococcus thermophilus temperate bacteriophage C   | 44        | 93         | 30               | 2          | 0         | 1           | 30            | 19359       | 19388                                 | 1                            |                                         |                               |                                                     |                                            |                                                 | 1 |   |
| 106_1_11                                                                                                  | TGATACTAAAAAGAGCCCTTTGGGTAA          | 30            | AY699705                 | Streptococcus thermophilus bacteriophage 2972, comp    | 52        | 97         | 30               | 1          | 0         | 1           | 30            | 9192        | 9221                                  | 1                            |                                         |                               |                                                     |                                            |                                                 | 1 |   |
| 106_1_12                                                                                                  | GGGCAATGATCGGTAAAGTTTGGCTGATG        | 30            |                          |                                                        | 34        | 95         | 21               | 1          | 6         | 26          | 14226         | 14246       |                                       |                              |                                         |                               |                                                     |                                            |                                                 | 1 |   |
| 107_1_01                                                                                                  | GAAATGTGCGGCTAACAAGGCTCTCCTT         | 30            | AJ239049                 | Streptococcus thermophilus partial repA gene, ORF1 to  | 60        | 100        | 30               | 0          | 1         | 30          | 4867          | 4896        |                                       |                              |                                         |                               |                                                     |                                            |                                                 | 1 |   |
| 107_1_02                                                                                                  | TAGAAGGAAATCATCAATGAGTAAAGA          | 30            |                          |                                                        | 38        | 100        | 19               | 0          | 3         | 21          | 4745          | 4727        |                                       |                              |                                         |                               |                                                     |                                            |                                                 | 1 |   |
| 107_1_03                                                                                                  | ATTTAAGTATATAGTCTGCTGCTGGTT          | 30            |                          |                                                        | 36        | 100        | 18               | 0          | 2         | 19          | 747880        | 747863      |                                       |                              |                                         |                               |                                                     |                                            |                                                 | 1 |   |
| 107_1_04                                                                                                  | TGCTTATCAGAAAAATTCGCCAAGCTG          | 30            |                          |                                                        | 36        | 100        | 18               | 0          | 2         | 19          | 1197806       | 1197789     |                                       |                              |                                         |                               |                                                     |                                            |                                                 | 1 |   |
| 107_1_05                                                                                                  | ATGACAAATTTGTAATATGAACTCAAG          | 30            |                          |                                                        | 36        | 100        | 18               | 0          | 3         | 28          | 173222        | 173209      |                                       |                              |                                         |                               |                                                     |                                            |                                                 | 1 |   |
| 107_1_06                                                                                                  | CCTATATGGTTGTACAGACACTCAATG          | 30            | AY699705                 | Streptococcus thermophilus bacteriophage 2972, comp    | 62        | 97         | 30               | 1          | 0         | 30          | 20067         | 20095       | 1                                     |                              |                                         |                               |                                                     |                                            |                                                 | 1 |   |
| 107_1_07                                                                                                  | TAAACAGTATATAAGAAATACCAAGG           | 31            | CP000003                 | Streptococcus pyogenes MGAS10394, complete genom       | 40        | 100        | 20               | 0          | 2         | 21          | 1113501       | 1113520     |                                       |                              |                                         |                               |                                                     |                                            |                                                 | 1 |   |
| 107_1_08                                                                                                  | TTATGAAGGAAATATAAATGATTAAGG          | 31            |                          |                                                        | 36        | 95         | 22               | 1          | 0         | 2           | 1029483       | 1029504     |                                       |                              |                                         |                               |                                                     |                                            |                                                 | 1 |   |
| 107_1_09                                                                                                  | CAAGAGTCTATTGAGCATTACAGAGCTGATA      | 31            |                          |                                                        | 34        | 100        | 17               | 0          | 11        | 27          | 899           | 905         |                                       |                              |                                         |                               |                                                     |                                            |                                                 | 1 |   |
| 107_1_10                                                                                                  | CATAGCTCTTATTTTGAATAAAGGGTGA         | 30            | CP000487                 | Campylobacter fetus subsp. fetus 82-40, complete genom | 42        | 100        | 21               | 0          | 6         | 26          | 1589617       | 1589597     |                                       |                              |                                         |                               |                                                     |                                            |                                                 | 1 |   |
| 107_1_11                                                                                                  | GATTAATTCGCTGATGATCGGCTGAGCT         | 30            | AY699705                 | Streptococcus thermophilus bacteriophage 2972, comp    | 52        | 97         | 30               | 1          | 0         | 1           | 30            | 10166       | 10137                                 | 1                            |                                         |                               |                                                     |                                            |                                                 | 1 |   |
| 107_1_12                                                                                                  | GACAATTTAGTACAGTATTTGGCTGCT          | 30            |                          |                                                        | 36        | 92         | 26               | 2          | 0         | 1           | 26            | 6412        | 6387                                  |                              |                                         |                               |                                                     |                                            |                                                 | 1 |   |
| 107_1_13                                                                                                  | AGAAATCATGATAAGTGGCTGAAACTGT         | 30            |                          |                                                        | 38        | 100        | 19               | 0          | 2         | 20          | 2484247       | 2484229     |                                       |                              |                                         |                               |                                                     |                                            |                                                 | 1 |   |
| 107_1_14                                                                                                  | AGTCACTACTATGTTAAATTAAGACGCA         | 30            |                          |                                                        | 34        | 100        | 17               | 0          | 7         | 23          | 3666882       | 3666866     |                                       |                              |                                         |                               |                                                     |                                            |                                                 | 1 |   |
| 107_1_15                                                                                                  | GACTTGAACCTGAATTAATCAAGGTAGCCA       | 30            | AF145054                 | Streptococcus thermophilus bacteriophage 7201, comp    | 64        | 100        | 27               | 0          | 4         | 30          | 6633          | 6607        | 1                                     |                              |                                         |                               |                                                     |                                            |                                                 | 1 |   |
| 107_1_16                                                                                                  | TGACTCTATTGATGCTTCATCTTTATTA         | 31            |                          |                                                        | 36        | 100        | 18               | 0          | 5         | 22          | 1632806       | 1632789     |                                       |                              |                                         |                               |                                                     |                                            |                                                 | 1 |   |
| 107_1_17                                                                                                  | CTTTCAAGATACTCAACCATGATGATGCA        | 30            |                          |                                                        | 34        | 100        | 17               | 0          | 12        | 28          | 1106361       | 1106377     |                                       |                              |                                         |                               |                                                     |                                            |                                                 | 1 |   |
| 107_1_18                                                                                                  | AAAGGTGCGTATGAACTCATCCAGCGGG         | 30            |                          |                                                        | 34        | 100        | 17               | 0          | 12        | 28          | 808           | 792         |                                       |                              |                                         |                               |                                                     |                                            |                                                 | 1 |   |
| 107_1_19                                                                                                  | CTATGCTTACTGTTCTTCCAAACCCACC         | 30            | AY699705                 | Streptococcus thermophilus bacteriophage 2972, comp    | 60        | 100        | 30               | 0          | 1         | 30          | 25325         | 25296       | 1                                     |                              |                                         |                               |                                                     |                                            |                                                 | 1 |   |
| 107_1_20                                                                                                  | TTTGTTCGCTTCACTTAGTTTACTAGG          | 30            | AF348736                 | Streptococcus thermophilus bacteriophage MD2 putativ   | 52        | 100        | 26               | 0          | 1         | 26          | 6041          | 6016        |                                       |                              |                                         |                               |                                                     |                                            |                                                 | 1 |   |
| 107_1_21                                                                                                  | AATACGGAACCTCCCTTCCGCTCACTAGC        | 30            |                          |                                                        | 36        | 100        | 18               | 0          | 1         | 23          | 1643259       | 1643276     |                                       |                              |                                         |                               |                                                     |                                            |                                                 | 1 |   |
| 107_1_22                                                                                                  | CAAGATTTATTAATTAAGATGCTTCTG          | 30            | AF348738                 | Streptococcus thermophilus bacteriophage DT4 host sp   | 40        | 93         | 28               | 2          | 0         | 1           | 28            | 2435        | 2462                                  | 1                            |                                         |                               |                                                     |                                            |                                                 | 1 |   |
| 108_1_01                                                                                                  | AATCTGTGTGGAAGTAAAGATTGAAGAT         | 30            | AF158600                 | Streptococcus thermophilus bacteriophage Sf11, comp    | 60        | 100        | 30               | 0          | 1         | 30          | 14782         | 14753       | 1                                     |                              |                                         |                               |                                                     |                                            |                                                 | 1 |   |
| 108_1_02                                                                                                  | ATATGTTTGAAGTATACCCATTAATTTG         | 30            |                          |                                                        | 38        | 96         | 23               | 1          | 0         | 8           | 807           | 889         |                                       |                              |                                         |                               |                                                     |                                            |                                                 | 1 |   |
| 108_1_03                                                                                                  | TCCACATGATAAAGGCAAGCCAGCAAGCT        | 29            |                          |                                                        | 34        | 100        | 17               | 0          | 8         | 24          | 1696143       | 1696159     |                                       |                              |                                         |                               |                                                     |                                            |                                                 | 1 |   |
| 108_1_04                                                                                                  | GAAGCAAAAATTTGCAACTGAGCTTCTTC        | 30            |                          |                                                        | 36        | 100        | 18               | 0          | 5         | 22          | 2662653       | 2662670     |                                       |                              |                                         |                               |                                                     |                                            |                                                 | 1 |   |
| 108_1_05                                                                                                  | ATTAATTTAAGTTGAAATGTTGCTTTTC         | 30            |                          |                                                        | 36        | 100        | 18               | 0          | 5         | 22          | 3270685       | 3270702     |                                       |                              |                                         |                               |                                                     |                                            |                                                 | 1 |   |
| 108_1_06                                                                                                  | GCAGACATTTGGCTCAAAAGTATGATGAA        | 30            | AF115102                 | Streptococcus therm                                    |           |            |                  |            |           |             |               |             |                                       |                              |                                         |                               |                                                     |                                            |                                                 |   |   |

| spacer identification (strain reference in Fig. 5, CRISPR locus, and spacer position from the leader end) | spacer sequence                 | spacer length | subject accession number | subject definition                                             | bit score | % identity | alignment length | mismatches | gaps | query start | query end | subject start | subject end | BLAST hit with S. thermophilus phages | BLAST hit with other viruses | BLAST hit with S. thermophilus plasmids | BLAST hit with other plasmids | BLAST hit with S. thermophilus chromosomal sequence | BLAST hit with other chromosomal sequences | No significant BLAST hit (bit score below 40.1) |
|-----------------------------------------------------------------------------------------------------------|---------------------------------|---------------|--------------------------|----------------------------------------------------------------|-----------|------------|------------------|------------|------|-------------|-----------|---------------|-------------|---------------------------------------|------------------------------|-----------------------------------------|-------------------------------|-----------------------------------------------------|--------------------------------------------|-------------------------------------------------|
| 112_1_02                                                                                                  | ACGACATTCCAGATGGAGCTGACCAAGATT  | 30            | AF085222                 | Streptococcus thermophilus bacteriophage DT1, complete genome  | 56        | 100        | 28               | 0          | 1    | 28          | 22557     | 22584         |             |                                       |                              |                                         |                               |                                                     |                                            |                                                 |
| 112_1_03                                                                                                  | TTCTCAGCCAGTATGCTAATTTGGTATGT   | 30            |                          |                                                                | 34        | 100        | 17               | 0          | 12   | 28          | 1466830   | 1466814       |             |                                       |                              |                                         |                               |                                                     |                                            |                                                 |
| 112_1_04                                                                                                  | GAGAAATCACGAAATATAAAAGACTTTT    | 30            |                          |                                                                | 34        | 100        | 17               | 0          | 9    | 25          | 450532    | 450516        |             |                                       |                              |                                         |                               |                                                     |                                            |                                                 |
| 112_1_05                                                                                                  | AGATAGCCACCAAGCGTTTCAGTATGCTA   | 30            | AF115102                 | Streptococcus thermophilus bacteriophage Sf19, complete genome | 60        | 100        | 30               | 0          | 1    | 30          | 15099     | 15070         |             |                                       |                              |                                         |                               |                                                     |                                            |                                                 |
| 112_1_06                                                                                                  | TACTTGAACACCCCTCAATCCCTTTGATGA  | 30            |                          |                                                                | 38        | 93         | 27               | 2          | 0    | 4           | 30        | 15272         | 15246       |                                       |                              |                                         |                               |                                                     |                                            |                                                 |
| 112_1_07                                                                                                  | TTTTAGCTTCAGTCTGTTTCAATGTATAT   | 30            |                          |                                                                | 32        | 100        | 16               | 0          | 7    | 22          | 1977      | 1962          |             |                                       |                              |                                         |                               |                                                     |                                            |                                                 |
| 112_1_08                                                                                                  | AAGTCTATACCCATAATATAGCTGAACCCG  | 30            | DQ295022                 | Streptococcus thermophilus plasmid pSMQ-316, complete genome   | 50        | 100        | 25               | 0          | 6    | 30          | 3483      | 3507          |             |                                       |                              |                                         |                               |                                                     |                                            |                                                 |
| 112_1_09                                                                                                  | ACATGCTGTATGTTTGGTATTTAGTAAACA  | 30            |                          |                                                                | 38        | 100        | 19               | 0          | 12   | 30          | 132341    | 132323        |             |                                       |                              |                                         |                               |                                                     |                                            |                                                 |
| 112_1_10                                                                                                  | GAGTTGGTGACCATTGACCCACTTATTT    | 30            |                          |                                                                | 34        | 100        | 17               | 0          | 1    | 17          | 3453040   | 3453056       |             |                                       |                              |                                         |                               |                                                     |                                            |                                                 |
| 113_1_01                                                                                                  | TTGAAAATGAAAAATACCCCTGGAACCGA   | 30            |                          |                                                                | 38        | 100        | 19               | 0          | 1    | 19          | 61231     | 61249         |             |                                       |                              |                                         |                               |                                                     |                                            |                                                 |
| 113_1_02                                                                                                  | GTGTCACCGCTTTGCTATTTATTCGGGA    | 30            | AF145054                 | Streptococcus thermophilus bacteriophage 7201, complete genome | 44        | 100        | 22               | 0          | 1    | 22          | 11958     | 11937         |             |                                       |                              |                                         |                               |                                                     |                                            |                                                 |
| 113_1_03                                                                                                  | CITTTTTCGGCTTTGACCACTCGGAAC     | 30            |                          |                                                                | 34        | 100        | 17               | 0          | 9    | 25          | 376629    | 376613        |             |                                       |                              |                                         |                               |                                                     |                                            |                                                 |
| 114_1_01                                                                                                  | ACGTAAGGATTTTTTTTATTTCTTGTTA    | 30            | CP000421                 | Streptococcus thermophilus LMD-9 plasmid 2, complete genome    | 46        | 97         | 31               | 0          | 1    | 30          | 2147      | 2177          |             |                                       |                              |                                         |                               |                                                     |                                            |                                                 |
| 114_1_02                                                                                                  | GTGAAAATTTTCAACCCCTACATATACAA   | 30            | CP000421                 | Streptococcus thermophilus LMD-9 plasmid 2, complete genome    | 52        | 97         | 30               | 1          | 0    | 1           | 915       | 886           |             |                                       |                              |                                         |                               |                                                     |                                            |                                                 |
| 114_1_03                                                                                                  | CCTCTGTAATGACTTAAACGGCTCGTTTT   | 30            | AF145054                 | Streptococcus thermophilus bacteriophage 7201, complete genome | 40        | 93         | 28               | 2          | 1    | 28          | 12444     | 12417         |             |                                       |                              |                                         |                               |                                                     |                                            |                                                 |
| 114_1_04                                                                                                  | AAATCAAAGTTTGGGTTGTGCTACGCTG    | 30            | CP000675                 | Legionella pneumophila str. Corby, complete genome             | 40        | 100        | 20               | 0          | 1    | 20          | 2666702   | 2666683       |             |                                       |                              |                                         |                               |                                                     |                                            |                                                 |
| 114_1_05                                                                                                  | ATATGTACATACCTAAGAAACACCGGGCA   | 30            |                          |                                                                | 34        | 100        | 17               | 0          | 12   | 28          | 345180    | 345164        |             |                                       |                              |                                         |                               |                                                     |                                            |                                                 |
| 114_1_06                                                                                                  | CGTTGTCAAATATGTGATTCATTTGATTT   | 30            | AF085222                 | Streptococcus thermophilus bacteriophage DT1, complete genome  | 42        | 93         | 29               | 2          | 0    | 2           | 31294     | 31266         |             |                                       |                              |                                         |                               |                                                     |                                            |                                                 |
| 114_1_07                                                                                                  | CCATAGCTGAATGTGTTTGTGACTGCTT    | 30            | AJ239049                 | Streptococcus thermophilus partial repA gene, ORF1 to ORF10    | 60        | 100        | 30               | 0          | 1    | 30          | 5473      | 5444          |             |                                       |                              |                                         |                               |                                                     |                                            |                                                 |
| 114_1_08                                                                                                  | CCTAGGTTTGGCTTTAAGTATAACAAGCT   | 30            |                          |                                                                | 36        | 95         | 22               | 1          | 0    | 5           | 26        | 1483900       | 1483921     |                                       |                              |                                         |                               |                                                     |                                            |                                                 |
| 114_1_09                                                                                                  | AAATGACGCTCAAGGACGCTTGAAGCAT    | 30            |                          |                                                                | 36        | 92         | 26               | 2          | 0    | 5           | 30        | 3220          | 3245        |                                       |                              |                                         |                               |                                                     |                                            |                                                 |
| 114_1_10                                                                                                  | TTTTTAAAGCTGTAGCGCTTTAGCTTTG    | 30            |                          |                                                                | 34        | 100        | 17               | 0          | 12   | 28          | 1710922   | 1710938       |             |                                       |                              |                                         |                               |                                                     |                                            |                                                 |
| 114_1_11                                                                                                  | TTGGCTTCGTAATAATTTTAAACGCGAT    | 30            | AF158600                 | Streptococcus thermophilus bacteriophage Sf11, complete genome | 52        | 97         | 30               | 1          | 0    | 1           | 30        | 28172         | 28143       |                                       |                              |                                         |                               |                                                     |                                            |                                                 |
| 114_1_12                                                                                                  | GTGTGAATCAATACGCTGAACACACTCC    | 30            |                          |                                                                | 32        | 95         | 20               | 1          | 0    | 6           | 25        | 5060524       | 5060543     |                                       |                              |                                         |                               |                                                     |                                            |                                                 |
| 114_1_13                                                                                                  | CGTATCAGTTGAAAGTTTCAACGTGTAAG   | 30            | U88974                   | Streptococcus thermophilus temperate bacteriophage C           | 60        | 100        | 30               | 0          | 1    | 30          | 31597     | 31568         |             |                                       |                              |                                         |                               |                                                     |                                            |                                                 |
| 114_1_14                                                                                                  | TAAACTATGTTGGCTATCTGCTCGAGGAA   | 30            |                          |                                                                | 38        | 100        | 19               | 0          | 1    | 19          | 1434      | 1452          |             |                                       |                              |                                         |                               |                                                     |                                            |                                                 |
| 114_1_15                                                                                                  | TAGACCACTAGCGAGTTTGTCTTTTGG     | 30            | CP000421                 | Streptococcus thermophilus LMD-9 plasmid 2, complete genome    | 60        | 100        | 30               | 0          | 1    | 30          | 2994      | 2985          |             |                                       |                              |                                         |                               |                                                     |                                            |                                                 |
| 114_1_16                                                                                                  | ACATCGCACTTCTGGGTTTTCACCGCTG    | 30            | AF085222                 | Streptococcus thermophilus bacteriophage DT1, complete genome  | 52        | 100        | 26               | 0          | 5    | 30          | 2966      | 2941          |             |                                       |                              |                                         |                               |                                                     |                                            |                                                 |
| 114_1_17                                                                                                  | AGTATGGCTATTGGCTGATACCTACCCAC   | 30            | CP000419                 | Streptococcus thermophilus LMD-9, complete genome              | 60        | 100        | 30               | 0          | 1    | 30          | 1570034   | 1570063       |             |                                       |                              |                                         |                               |                                                     |                                            |                                                 |
| 114_1_18                                                                                                  | CGCTTTCAGCTGGCTGGTACATCTACGC    | 30            | AY699705                 | Streptococcus thermophilus bacteriophage 2972, complete genome | 60        | 100        | 30               | 0          | 1    | 30          | 22759     | 22788         |             |                                       |                              |                                         |                               |                                                     |                                            |                                                 |
| 114_1_19                                                                                                  | GAGTACATGGAGTTTCTGCTAGATACATA   | 30            |                          |                                                                | 34        | 100        | 17               | 0          | 7    | 23          | 79        | 63            |             |                                       |                              |                                         |                               |                                                     |                                            |                                                 |
| 114_1_20                                                                                                  | TAAATGTAATATAAAGTTATGTCTA       | 29            | AY699705                 | Streptococcus thermophilus bacteriophage 2972, complete genome | 54        | 100        | 27               | 0          | 3    | 29          | 33025     | 33051         |             |                                       |                              |                                         |                               |                                                     |                                            |                                                 |
| 114_1_21                                                                                                  | AACGTTATGACATTTAGGAGCTTCCAAAT   | 30            | CP000421                 | Streptococcus thermophilus LMD-9 plasmid 2, complete genome    | 44        | 93         | 30               | 2          | 1    | 0           | 810       | 781           |             |                                       |                              |                                         |                               |                                                     |                                            |                                                 |
| 114_1_22                                                                                                  | ACACAGCAAGCAAAAGGATGACACTTT     | 29            |                          |                                                                | 32        | 100        | 16               | 0          | 6    | 21          | 5215550   | 5215535       |             |                                       |                              |                                         |                               |                                                     |                                            |                                                 |
| 114_1_23                                                                                                  | CAACCAAACTTACGCTACAGTACATCTG    | 30            |                          |                                                                | 36        | 100        | 18               | 0          | 10   | 27          | 2462817   | 2462834       |             |                                       |                              |                                         |                               |                                                     |                                            |                                                 |
| 114_1_24                                                                                                  | ACACGCGCTTACCTCGTATATCAAAATCA   | 29            |                          |                                                                | 32        | 100        | 16               | 0          | 2    | 17          | 33096     | 33111         |             |                                       |                              |                                         |                               |                                                     |                                            |                                                 |
| 114_1_25                                                                                                  | TGCCCGAACTAGGATACACACAGCAT      | 30            | AY312334                 | Streptococcus thermophilus plasmid pSMQ308, complete genome    | 52        | 97         | 30               | 1          | 0    | 1           | 30        | 7613          | 7642        |                                       |                              |                                         |                               |                                                     |                                            |                                                 |
| 114_1_26                                                                                                  | CTCAAGCTTCTCATCTGTGATAGTGGTTT   | 31            |                          |                                                                | 36        | 100        | 18               | 0          | 10   | 27          | 1153187   | 1153204       |             |                                       |                              |                                         |                               |                                                     |                                            |                                                 |
| 114_1_27                                                                                                  | ATCACTTTTATAGTATCTCAAACGCTGG    | 30            |                          |                                                                | 34        | 100        | 17               | 0          | 9    | 25          | 1159329   | 1159345       |             |                                       |                              |                                         |                               |                                                     |                                            |                                                 |
| 114_1_28                                                                                                  | GAACAGCTCAGACAGCTAATTCGCCAAT    | 30            |                          |                                                                | 34        | 100        | 17               | 0          | 13   | 29          | 3909      | 3925          |             |                                       |                              |                                         |                               |                                                     |                                            |                                                 |
| 114_1_29                                                                                                  | ATATTTGAAAGATACAAGGACACTTACAC   | 30            |                          |                                                                | 36        | 100        | 18               | 0          | 2    | 19          | 130428    | 130411        |             |                                       |                              |                                         |                               |                                                     |                                            |                                                 |
| 114_1_30                                                                                                  | CGCGATGAAACACAACCTCAATTTGATTC   | 30            |                          |                                                                | 36        | 100        | 18               | 0          | 11   | 28          | 504213    | 504196        |             |                                       |                              |                                         |                               |                                                     |                                            |                                                 |
| 115_1_01                                                                                                  | TACTGAGTTAGCTGTGGAAGCTCATTTTC   | 30            |                          |                                                                | 34        | 100        | 17               | 0          | 3    | 19          | 26820     | 26804         |             |                                       |                              |                                         |                               |                                                     |                                            |                                                 |
| 115_1_02                                                                                                  | CTTTCGCTGAAAGCTTCTGCTGCTGCTG    | 30            | AF085222                 | Streptococcus thermophilus bacteriophage DT1, complete genome  | 52        | 100        | 17               | 0          | 4    | 26          | 1128298   | 1128304       |             |                                       |                              |                                         |                               |                                                     |                                            |                                                 |
| 115_1_03                                                                                                  | CTGCAATTTGTAACGACTTCTTGGCTGT    | 30            |                          |                                                                | 34        | 100        | 17               | 0          | 5    | 25          | 15627     | 15603         |             |                                       |                              |                                         |                               |                                                     |                                            |                                                 |
| 115_1_04                                                                                                  | ATAACTCGAATGCTAAGCTTCAACGAAGCT  | 30            | AF145054                 | Streptococcus thermophilus bacteriophage 7201, complete genome | 60        | 100        | 30               | 0          | 1    | 30          | 20206     | 20235         |             |                                       |                              |                                         |                               |                                                     |                                            |                                                 |
| 115_1_05                                                                                                  | AATTTGCTCAGCACTTCAACCAACCGCCAG  | 30            | AF145054                 | Streptococcus thermophilus bacteriophage 7201, complete genome | 50        | 100        | 25               | 0          | 6    | 30          | 28491     | 28515         |             |                                       |                              |                                         |                               |                                                     |                                            |                                                 |
| 115_1_06                                                                                                  | ATAAAATTTGCGCAGCTTTGGGCACTAGAT  | 30            |                          |                                                                | 34        | 100        | 17               | 0          | 4    | 20          | 1753534   | 1753550       |             |                                       |                              |                                         |                               |                                                     |                                            |                                                 |
| 115_1_07                                                                                                  | ATGCTCTGAGGCTGTAGTAATTAAGTTGT   | 30            |                          |                                                                | 34        | 100        | 17               | 0          | 2    | 18          | 174298    | 174282        |             |                                       |                              |                                         |                               |                                                     |                                            |                                                 |
| 115_1_08                                                                                                  | CITTTAAGAGTTGATTAAGTGGCTTACTGT  | 30            |                          |                                                                | 36        | 100        | 18               | 0          | 4    | 21          | 137362    | 137379        |             |                                       |                              |                                         |                               |                                                     |                                            |                                                 |
| 115_1_09                                                                                                  | AAATGGGTTATGCTGTTCAAATGCGTCCC   | 30            |                          |                                                                | 38        | 100        | 19               | 0          | 12   | 30          | 1467704   | 1467686       |             |                                       |                              |                                         |                               |                                                     |                                            |                                                 |
| 115_1_10                                                                                                  | AAACTGAAACAAACACAGCAATCAACAA    | 30            |                          |                                                                | 38        | 96         | 23               | 1          | 0    | 1           | 23        | 7114          | 7136        |                                       |                              |                                         |                               |                                                     |                                            |                                                 |
| 115_1_11                                                                                                  | GCCCAAAATGCTAGACGTTTGAATGACGGC  | 30            | AF145054                 | Streptococcus thermophilus bacteriophage 7201, complete genome | 60        | 100        | 30               | 0          | 1    | 30          | 17895     | 17924         |             |                                       |                              |                                         |                               |                                                     |                                            |                                                 |
| 115_1_12                                                                                                  | ATGAAAGACGTTGACTTCACTACCGTATGCT | 30            |                          |                                                                | 34        | 100        | 17               | 0          | 6    | 22          | 1277449   | 1277465       |             |                                       |                              |                                         |                               |                                                     |                                            |                                                 |
| 115_1_13                                                                                                  | GCTTTGCGAATGCTCTCAGTGGCGAATTT   | 31            | AF145054                 | Streptococcus thermophilus bacteriophage 7201, complete genome | 40        | 93         | 28               | 2          | 4    | 31          | 3974      | 4001          |             |                                       |                              |                                         |                               |                                                     |                                            |                                                 |
| 115_1_14                                                                                                  | TATTTATGCAAAATGGTATCCATATTTTA   | 30            |                          |                                                                | 38        | 100        | 19               | 0          | 11   | 29          | 2342469   | 2342451       |             |                                       |                              |                                         |                               |                                                     |                                            |                                                 |
| 115_1_15                                                                                                  | CCTCAAAGCTTAAAATGGGCTGAAGTAGA   | 30            | AF085222                 | Streptococcus thermophilus bacteriophage DT1, complete genome  | 48        | 96         | 28               | 1          | 0    | 3           | 19256     | 19229         |             |                                       |                              |                                         |                               |                                                     |                                            |                                                 |
| 115_1_16                                                                                                  | TATTTAGCACTACGGTATCAGGTTATCTC   | 30            | AY699705                 | Streptococcus thermophilus bacteriophage 2972, complete genome | 60        | 100        | 30               | 0          | 1    | 30          | 8162      | 8133          |             |                                       |                              |                                         |                               |                                                     |                                            |                                                 |
| 115_1_17                                                                                                  | AAGGGTTAAGCTCTCATAGAGTGGAAAA    | 30            |                          |                                                                | 34        | 100        | 17               | 0          | 6    | 22          | 21439     | 21455         |             |                                       |                              |                                         |                               |                                                     |                                            |                                                 |
| 115_1_18                                                                                                  | GCAATTTATCGCTTGAAGTACTACAGTTT   | 30            |                          |                                                                | 34        | 100        | 17               | 0          | 3    | 19          | 5567      | 5551          |             |                                       |                              |                                         |                               |                                                     |                                            |                                                 |
| 115_1_19                                                                                                  | TGCTACGCTCTGGAAGCTTCTGCTATGAC   | 30            | AF085222                 | Streptococcus thermophilus bacteriophage DT1, complete genome  | 38        | 100        | 19               | 0          | 1    | 19          | 1749958   | 1749941       |             |                                       |                              |                                         |                               |                                                     |                                            |                                                 |
| 115_1_20                                                                                                  | CTTAGCTTTGAAATGGCAGCTAGTGAACGA  | 31            |                          |                                                                | 34        | 100        | 17               | 0          | 5    | 21          | 1294441   | 1294457       |             |                                       |                              |                                         |                               |                                                     |                                            |                                                 |
| 115_1_21                                                                                                  | GGTGGGTGACGCTCAACAGCACTGAA      | 30            |                          |                                                                | 34        | 100        | 17               | 0          | 14   | 30          | 1317267   | 1317283       |             |                                       |                              |                                         |                               |                                                     |                                            |                                                 |
| 115_1_22                                                                                                  | GATGGCGCTACACATACACTACGCTACGCT  | 30            | AF145054                 | Streptococcus thermophilus bacteriophage 7201, complete genome | 56        | 100        | 28               | 0          | 3    | 30          | 31442     | 31469         |             |                                       |                              |                                         |                               |                                                     |                                            |                                                 |
| 115_1_23                                                                                                  | TATTCGAGAAGTGAAGAACCAATCATCGA   | 30            |                          |                                                                | 34        | 100        | 17               | 0          | 4    | 20          | 476566    | 476582        |             |                                       |                              |                                         |                               |                                                     |                                            |                                                 |
| 115_1_24                                                                                                  | TACTTTCGAGCGTGAAGAAGCTACTACTA   | 30            | AF145054                 | Streptococcus thermophilus bacteriophage 7201, complete genome | 40        | 93         | 28               | 2          | 3    | 30          | 12870     | 12897         |             |                                       |                              |                                         |                               |                                                     |                                            |                                                 |
| 116_1_01                                                                                                  | GTGTTTCATGAGCTTTTATATCAACGCTG   | 30            | AF145054                 | Streptococcus thermophilus bacteriophage 7201, complete genome | 34        | 100        | 17               |            |      |             |           |               |             |                                       |                              |                                         |                               |                                                     |                                            |                                                 |



| spacer identification<br>(strain reference in Fig. 5, CRISPR<br>focus, and spacer position from the<br>leader etc) | spacer sequence                  | spacer length | subject accession number | subject definition                                    | bit score | % identity | alignment length | mismatches | gap opens | query start | query end | subject start | subject end | BLAST hit with S. thermophilus<br>phages | BLAST hit with other viruses | BLAST hit with S. thermophilus<br>plasmids | BLAST hit with other plasmids | BLAST hit with S. thermophilus<br>chromosomal sequence | BLAST hit with other chromosomal<br>sequences | No significant BLAST hit<br>(bit score below 40.1) |
|--------------------------------------------------------------------------------------------------------------------|----------------------------------|---------------|--------------------------|-------------------------------------------------------|-----------|------------|------------------|------------|-----------|-------------|-----------|---------------|-------------|------------------------------------------|------------------------------|--------------------------------------------|-------------------------------|--------------------------------------------------------|-----------------------------------------------|----------------------------------------------------|
| 118_1_10                                                                                                           | TAAGGGAGACAGGACAAAGCAAAACAC      | 30            |                          |                                                       | 36        | 100        | 18               | 0          | 0         | 6           | 23        | 1162          | 1145        |                                          |                              |                                            |                               |                                                        |                                               | 1                                                  |
| 118_1_11                                                                                                           | TTTTGAAACTAAAGCCAAACAGTACTGAC    | 30            | AF158600                 | Streptococcus thermophilus bacteriophage Sf11, comp   | 60        | 100        | 30               | 0          | 0         | 1           | 30        | 4455          | 4484        | 1                                        |                              |                                            |                               |                                                        |                                               |                                                    |
| 118_1_12                                                                                                           | TATTTTCAATCGTCCGGTATCTGCTAGA     | 30            | AF158600                 | Streptococcus thermophilus bacteriophage Sf11, comp   | 60        | 100        | 30               | 0          | 0         | 1           | 30        | 28478         | 28449       | 1                                        |                              |                                            |                               |                                                        |                                               |                                                    |
| 118_1_13                                                                                                           | GGGAGAAAATTTGGCAAAATGATGGAACAT   | 30            |                          |                                                       | 36        | 100        | 18               | 0          | 0         | 11          | 28        | 3766588       | 3766571     |                                          |                              |                                            |                               |                                                        |                                               | 1                                                  |
| 118_1_14                                                                                                           | TCATTCCGAGGTAAACGATGGTAAACAAGGAC | 30            | AY699705                 | Streptococcus thermophilus bacteriophage 2972, comp   | 60        | 100        | 30               | 0          | 0         | 1           | 30        | 19908         | 19937       | 1                                        |                              |                                            |                               |                                                        |                                               |                                                    |
| 118_1_15                                                                                                           | CAACACCGTAGAACATTAACAAGTACGTG    | 30            | AF145054                 | Streptococcus thermophilus bacteriophage 7201, comp   | 48        | 100        | 24               | 0          | 0         | 7           | 30        | 9090          | 9113        | 1                                        |                              |                                            |                               |                                                        |                                               |                                                    |
| 119_1_01                                                                                                           | TAAATTTAATATATCCCATCGACTG        | 30            |                          |                                                       | 38        | 100        | 19               | 0          | 0         | 1           | 19        | 4818930       | 4818948     |                                          |                              |                                            |                               |                                                        |                                               | 1                                                  |
| 119_1_02                                                                                                           | GGATAAGGGCAGACAAAGCAACTTAAGCA    | 30            | AF145054                 | Streptococcus thermophilus bacteriophage 7201, comp   | 44        | 96         | 26               | 1          | 0         | 5           | 30        | 20175         | 20200       | 1                                        |                              |                                            |                               |                                                        |                                               |                                                    |
| 119_1_03                                                                                                           | GGGACCATGTAAACCCGGTAAAGATAGCG    | 29            |                          |                                                       | 34        | 100        | 17               | 0          | 0         | 10          | 26        | 37            | 53          |                                          |                              |                                            |                               |                                                        |                                               | 1                                                  |
| 119_1_05                                                                                                           | CGCTATGAATGCTGATTAAGACCTTTTAA    | 30            | AF158600                 | Streptococcus thermophilus bacteriophage Sf11, comp   | 48        | 96         | 28               | 1          | 0         | 3           | 30        | 7338          | 7365        | 1                                        |                              |                                            |                               |                                                        |                                               |                                                    |
| 119_1_06                                                                                                           | GACTTAGGCCCTACCCCTTAAATAAGCA     | 30            |                          |                                                       | 38        | 100        | 19               | 0          | 0         | 6           | 24        | 1834897       | 1834879     |                                          |                              |                                            |                               |                                                        |                                               | 1                                                  |
| 119_1_07                                                                                                           | ATCATATAAGGAAAGACAGAAATATTCTA    | 30            |                          |                                                       | 38        | 100        | 19               | 0          | 0         | 9           | 27        | 1698087       | 1698105     |                                          |                              |                                            |                               |                                                        |                                               | 1                                                  |
| 119_1_08                                                                                                           | AACTATGGTAGAATATTGACGCCCTCACCG   | 30            | AF145054                 | Streptococcus thermophilus bacteriophage 7201, comp   | 42        | 93         | 29               | 2          | 0         | 2           | 30        | 22950         | 22978       | 1                                        |                              |                                            |                               |                                                        |                                               |                                                    |
| 119_1_09                                                                                                           | ACGTGCTTATATGCTAGAAATCGAAACCG    | 31            |                          |                                                       | 38        | 100        | 19               | 0          | 0         | 13          | 31        | 25491         | 25473       |                                          |                              |                                            |                               |                                                        |                                               | 1                                                  |
| 119_1_10                                                                                                           | CCCTACGAAATTTTAAACGACCCCGCCG     | 31            |                          |                                                       | 34        | 100        | 17               | 0          | 0         | 5           | 21        | 90329         | 90313       |                                          |                              |                                            |                               |                                                        |                                               | 1                                                  |
| 119_1_11                                                                                                           | TACTTACCATGGAAACGATTAATGACGAC    | 30            | AY699705                 | Streptococcus thermophilus bacteriophage 2972, comp   | 44        | 96         | 26               | 1          | 0         | 1           | 26        | 25069         | 25094       | 1                                        |                              |                                            |                               |                                                        |                                               |                                                    |
| 119_1_12                                                                                                           | GGGAGTATAAATACGAAAAGGTAGATAT     | 30            |                          |                                                       | 34        | 100        | 17               | 0          | 0         | 4           | 20        | 97088         | 97072       |                                          |                              |                                            |                               |                                                        |                                               | 1                                                  |
| 119_1_13                                                                                                           | TATGTCACCACGTTGCAACCATACCCACT    | 30            |                          |                                                       | 34        | 100        | 17               | 0          | 0         | 13          | 29        | 206508        | 206492      |                                          |                              |                                            |                               |                                                        |                                               | 1                                                  |
| 120_1_01                                                                                                           | GAATAGCGAAGCAGCTCAACATCTTGGGA    | 30            |                          |                                                       | 32        | 100        | 16               | 0          | 0         | 13          | 28        | 43368         | 43353       |                                          |                              |                                            |                               |                                                        |                                               | 1                                                  |
| 120_1_02                                                                                                           | TCATATTGCTTATGCTAACCTCTCGGATG    | 30            | AF348739                 | Streptococcus thermophilus bacteriophage DT2 host sp  | 46        | 100        | 23               | 0          | 0         | 8           | 30        | 1669          | 1691        | 1                                        |                              |                                            |                               |                                                        |                                               |                                                    |
| 120_1_03                                                                                                           | ATGCTACTAACAATACAGATCAATTTAAA    | 30            |                          |                                                       | 34        | 100        | 17               | 0          | 0         | 14          | 30        | 3789820       | 3789836     |                                          |                              |                                            |                               |                                                        |                                               | 1                                                  |
| 120_1_04                                                                                                           | TGCCCACTCGTTAATCTTGGCAACTAGTGC   | 30            | AF085222                 | Streptococcus thermophilus bacteriophage DT1, comple  | 58        | 100        | 29               | 0          | 0         | 2           | 30        | 32161         | 32133       | 1                                        |                              |                                            |                               |                                                        |                                               |                                                    |
| 120_1_05                                                                                                           | TACCATCTAGGATAGGTACTGGTCACTGCC   | 30            | AF085222                 | Streptococcus thermophilus bacteriophage DT1, comple  | 54        | 100        | 27               | 0          | 0         | 1           | 27        | 4427          | 4401        | 1                                        |                              |                                            |                               |                                                        |                                               |                                                    |
| 120_1_06                                                                                                           | CTAAGTAAATAGCAGTAGCGGAAGGAATG    | 30            |                          |                                                       | 36        | 100        | 18               | 0          | 0         | 11          | 28        | 8128          | 8145        |                                          |                              |                                            |                               |                                                        |                                               | 1                                                  |
| 120_1_07                                                                                                           | CTTAGAATAGAGTAGAGTTTGAAGCGCGT    | 30            |                          |                                                       | 36        | 100        | 18               | 0          | 0         | 7           | 24        | 3984511       | 3984528     |                                          |                              |                                            |                               |                                                        |                                               | 1                                                  |
| 120_1_08                                                                                                           | TATATGCAAACTTACCTAAAGAGCTG       | 29            | AF085222                 | Streptococcus thermophilus bacteriophage DT1, comple  | 58        | 100        | 29               | 0          | 0         | 1           | 29        | 7385          | 7413        | 1                                        |                              |                                            |                               |                                                        |                                               |                                                    |
| 120_1_09                                                                                                           | AGTCACCTCAAAGCTTAAATGGCGTAA      | 30            | AF085222                 | Streptococcus thermophilus bacteriophage DT1, comple  | 40        | 93         | 28               | 2          | 0         | 3           | 30        | 19261         | 19234       | 1                                        |                              |                                            |                               |                                                        |                                               |                                                    |
| 120_1_10                                                                                                           | GSTACTACACCTCAAAGCTTAAAGGATGG    | 30            | AF145054                 | Streptococcus thermophilus bacteriophage 7201, comp   | 60        | 100        | 30               | 0          | 0         | 1           | 30        | 227           | 256         | 1                                        |                              |                                            |                               |                                                        |                                               |                                                    |
| 120_1_12                                                                                                           | GGCTTAACCTGGTTACCAATGATCAITGT    | 30            | AF158600                 | Streptococcus thermophilus bacteriophage Sf11, comp   | 40        | 93         | 28               | 2          | 0         | 3           | 30        | 1663          | 1636        | 1                                        |                              |                                            |                               |                                                        |                                               |                                                    |
| 121_1_01                                                                                                           | CATTTGAACAGCGAACAAGACCAATA       | 29            |                          |                                                       | 36        | 95         | 22               | 1          | 0         | 2           | 23        | 564151        | 564130      |                                          |                              |                                            |                               |                                                        |                                               | 1                                                  |
| 121_1_02                                                                                                           | CGTTCCTGGGCTTATAAGATTAGCTATGT    | 30            |                          |                                                       | 34        | 100        | 17               | 0          | 0         | 12          | 28        | 1197556       | 1197540     |                                          |                              |                                            |                               |                                                        |                                               | 1                                                  |
| 121_1_03                                                                                                           | ACCTATTGAGACTGTAATAATCCATAAGCG   | 30            |                          |                                                       | 34        | 100        | 17               | 0          | 0         | 10          | 26        | 118           | 134         |                                          |                              |                                            |                               |                                                        |                                               | 1                                                  |
| 121_1_04                                                                                                           | ATCAACGTTTGGCAGGTCAATTCCTCAGT    | 30            | AY699705                 | Streptococcus thermophilus bacteriophage 2972, comp   | 52        | 97         | 30               | 1          | 0         | 1           | 30        | 28948         | 28919       | 1                                        |                              |                                            |                               |                                                        |                                               |                                                    |
| 121_1_05                                                                                                           | ATGTTGCGATAACCTACAGTTACTAAGTAA   | 30            | AF158601                 | Streptococcus thermophilus bacteriophage SFI18 lysin, | 60        | 100        | 30               | 0          | 0         | 1           | 30        | 12102         | 12073       | 1                                        |                              |                                            |                               |                                                        |                                               |                                                    |
| 121_1_06                                                                                                           | AGACAATCAGCTTATGATGGTTTCTTTGG    | 30            | AF085222                 | Streptococcus thermophilus bacteriophage DT1, comple  | 46        | 96         | 27               | 1          | 0         | 1           | 27        | 2546          | 2572        | 1                                        |                              |                                            |                               |                                                        |                                               |                                                    |
| 121_1_07                                                                                                           | AGACGACTTGAACGTTGGATATCCACT      | 30            | AF158600                 | Streptococcus thermophilus bacteriophage Sf11, comp   | 60        | 100        | 30               | 0          | 0         | 1           | 30        | 11792         | 11763       | 1                                        |                              |                                            |                               |                                                        |                                               |                                                    |
| 121_1_09                                                                                                           | TTAGATACCAATTAATCAATACGAGAGGAT   | 30            |                          |                                                       | 34        | 100        | 17               | 0          | 0         | 14          | 30        | 91393         | 91409       |                                          |                              |                                            |                               |                                                        |                                               | 1                                                  |
| 121_1_10                                                                                                           | TTGCCATAATACCTCAAGCCCTCAACTA     | 30            |                          |                                                       | 36        | 100        | 18               | 0          | 0         | 1           | 18        | 677111        | 677128      |                                          |                              |                                            |                               |                                                        |                                               | 1                                                  |
| 122_1_01                                                                                                           | AAGTCTAGAGTATGTTTGAAGAAAGCA      | 29            |                          |                                                       | 34        | 100        | 17               | 0          | 0         | 13          | 29        | 762420        | 762436      |                                          |                              |                                            |                               |                                                        |                                               | 1                                                  |
| 122_1_02                                                                                                           | TCCAGTCTACAGTGTATGTTTCATCACC     | 30            | AF158600                 | Streptococcus thermophilus bacteriophage Sf11, comp   | 40        | 93         | 28               | 2          | 0         | 2           | 29        | 26642         | 26615       | 1                                        |                              |                                            |                               |                                                        |                                               |                                                    |
| 122_1_03                                                                                                           | GCCTTGTITTTGGCTGAATACGACCGGCTT   | 30            |                          |                                                       | 36        | 100        | 18               | 0          | 0         | 5           | 22        | 1490556       | 1490539     |                                          |                              |                                            |                               |                                                        |                                               | 1                                                  |
| 122_1_04                                                                                                           | CAGCTTGAATCTGACAGAAAGTCAAAAT     | 30            |                          |                                                       | 36        | 100        | 18               | 0          | 0         | 7           | 24        | 5462          | 5445        |                                          |                              |                                            |                               |                                                        |                                               | 1                                                  |
| 122_1_05                                                                                                           | TATCGTAAATGATCAATGAAGATTGSAAC    | 30            | AF145054                 | Streptococcus thermophilus bacteriophage 7201, comp   | 48        | 96         | 27               | 1          | 0         | 1           | 27        | 34441         | 34467       | 1                                        |                              |                                            |                               |                                                        |                                               |                                                    |
| 122_1_06                                                                                                           | TAAAGAACTAACCAAGCTTTAAGCCAAAG    | 30            |                          |                                                       | 34        | 90         | 29               | 3          | 0         | 1           | 29        | 2988          | 3016        |                                          |                              |                                            |                               |                                                        |                                               | 1                                                  |
| 122_1_07                                                                                                           | TACCGAGAGATGCTGCTTATGCCATGCTC    | 30            | AF115103                 | Streptococcus thermophilus bacteriophage Sf121, comp  | 52        | 97         | 30               | 1          | 0         | 1           | 30        | 21079         | 21050       | 1                                        |                              |                                            |                               |                                                        |                                               |                                                    |
| 123_1_01                                                                                                           | AGATGCTTGTGCGCTTGAACAACAGC       | 29            |                          |                                                       | 34        | 100        | 17               | 0          | 0         | 9           | 25        | 4781959       | 4781975     |                                          |                              |                                            |                               |                                                        |                                               | 1                                                  |
| 123_1_02                                                                                                           | TTTGATGCGCTTGTGAGGAACTGATAT      | 30            |                          |                                                       | 36        | 100        | 18               | 0          | 0         | 1           | 18        | 3148          | 3165        |                                          |                              |                                            |                               |                                                        |                                               | 1                                                  |
| 123_1_04                                                                                                           | AAAGACAGGCCCAAGGATTAAGTACGAA     | 30            | AJ242479                 | Streptococcus thermophilus res gene, ORF2 and ORF3    | 48        | 96         | 28               | 1          | 0         | 1           | 28        | 1240          | 1267        |                                          |                              | 1                                          |                               |                                                        |                                               |                                                    |
| 123_1_05                                                                                                           | CTACATTTGATCATGTTTTCTCCTGT       | 30            |                          |                                                       | 36        | 100        | 18               | 0          | 0         | 13          | 30        | 1881394       | 1881411     |                                          |                              |                                            |                               |                                                        |                                               | 1                                                  |
| 123_1_06                                                                                                           | TAGAAGCTCTGGAATACAAAGCAATCT      | 30            | DQ437519                 | Streptococcus thermophilus plasmid p2991 chaperone    | 60        | 100        | 30               | 0          | 0         | 1           | 30        | 613           | 584         |                                          |                              | 1                                          |                               |                                                        |                                               |                                                    |
| 123_1_07                                                                                                           | CGAAGCTTGGCAGAAATCCGCTGGCGT      | 30            |                          |                                                       | 34        | 95         | 21               | 1          | 0         | 10          | 30        | 3298899       | 3298919     |                                          |                              |                                            |                               |                                                        |                                               | 1                                                  |
| 124_1_01                                                                                                           | TGATTAGCAAAATTAACAAGGATATTGG     | 30            | AY699705                 | Streptococcus thermophilus bacteriophage 2972, comp   | 48        | 96         | 28               | 1          | 0         | 1           | 28        | 3286          | 3313        | 1                                        |                              |                                            |                               |                                                        |                                               |                                                    |
| 124_1_02                                                                                                           | AAATAAGAGTCTTACGACCAACCCGACAT    | 30            | AY699705                 | Streptococcus thermophilus bacteriophage 2972, comp   | 52        | 97         | 30               | 1          | 0         | 1           | 30        | 4828          | 4799        | 1                                        |                              |                                            |                               |                                                        |                                               |                                                    |
| 124_1_03                                                                                                           | AAATGATGATTAATGCTTGAAGATAGCAGT   | 30            | AY699705                 | Streptococcus thermophilus bacteriophage 2972, comp   | 60        | 100        | 30               | 0          | 0         | 1           | 30        | 13593         | 13564       | 1                                        |                              |                                            |                               |                                                        |                                               |                                                    |
| 124_1_04                                                                                                           | TCGTAACGTCGATACAGAAACAGCTGCTT    | 30            | AY699705                 | Streptococcus thermophilus bacteriophage 2972, comp   | 50        | 97         | 29               | 1          | 0         | 1           | 29        | 1658          | 1686        | 1                                        |                              |                                            |                               |                                                        |                                               |                                                    |
| 124_1_05                                                                                                           | CGAAGTGGCAGAGCAGGCTTACACCAAA     | 30            |                          |                                                       | 34        | 100        | 17               | 0          | 0         | 14          | 30        | 15019         | 15035       |                                          |                              |                                            |                               |                                                        |                                               | 1                                                  |
| 124_1_06                                                                                                           | GACTTGATTAAGCTCTATACCAAGCGACATG  | 31            | AF158600                 | Streptococcus thermophilus bacteriophage Sf11, comp   | 58        | 100        | 29               | 0          | 0         | 1           | 29        | 1521          | 1549        | 1                                        |                              |                                            |                               |                                                        |                                               |                                                    |
| 124_1_07                                                                                                           | AAGAAGTCAAGAACCTATCCGCTGGTCGG    | 31            | AF085222                 | Streptococcus thermophilus bacteriophage DT1, comple  | 42        | 96         | 25               | 1          | 0         | 6           | 30        | 23774         | 23798       | 1                                        |                              |                                            |                               |                                                        |                                               |                                                    |
| 124_1_08                                                                                                           | AGGGCTAATCGTTGATATCACCGGAAC      | 31            |                          |                                                       | 36        | 100        | 18               | 0          | 0         | 14          | 31        | 2502269       | 2502252     |                                          |                              |                                            |                               |                                                        |                                               | 1                                                  |
